# Supplementary material for: HSBP7 Rescue of a Titin Cardiomyopathy Identified by Morphological Profiling
Source: Research Square preprint supplement (doi:10.21203/rs.3.rs-4558927/v1), 2024-07-08
Supplement: Supplementary file 1 [file 52af6f3cbe1f18a2fc6ecfd8.xlsx]

## Sheet: Annotation
MyList	Gene ID	Type	Tax ID	Homologene Gene ID	Homologene Gene Tax ID	GO:0044057 regulation of system process	R-HSA-909733 Interferon alpha/beta signalin	GO:0042391 regulation of membrane potenti	GO:0001568 blood vessel development	GO:0030029 actin filament-based process	GO:0030308 negative regulation of cell gr	GO:0005509 calcium ion binding	GO:0071363 cellular response to growth fa	GO:0034330 cell junction organization	GO:0005178 integrin binding	GO:0015800 acidic amino acid transport	GO:0008015 blood circulation	GO:0045664 regulation of neuron different	GO:0004864 protein phosphatase inhibitor	R-HSA-1474244 Extracellular matrix organizat	GO:0032872 regulation of stress-activated	GO:0071214 cellular response to abiotic s	GO:0032652 regulation of interleukin-1 pr	hsa04020 Calcium signaling pathway	GO:0045995 regulation of embryonic develo
APELA	100506013	symbol	H. sapiens	100506013	H. sapiens	1	0	0	1	0	1	0	0	0	0	0	0	0	0	0	0	0	0	0	0
ASB15	142685	symbol	H. sapiens	142685	H. sapiens	0	0	0	0	0	0	0	0	0	0	0	0	0	0	0	0	0	0	0	0
LOC101927179	101927179	Gene_ID	H. sapiens	101927179	H. sapiens	0	0	0	0	0	0	0	0	0	0	0	0	0	0	0	0	0	0	0	0
SLC2A5	6518	symbol	H. sapiens	6518	H. sapiens	0	0	0	0	0	0	0	0	0	0	0	1	0	0	0	0	0	0	0	0
GRM1	2911	symbol	H. sapiens	2911	H. sapiens	1	0	1	1	0	0	0	0	0	0	1	0	0	0	0	0	1	0	1	0
UNC13C	440279	symbol	H. sapiens	440279	H. sapiens	0	0	0	0	0	0	1	0	1	0	1	0	0	0	0	0	0	0	0	0
DIRAS3	9077	symbol	H. sapiens	9077	H. sapiens	0	0	0	0	0	0	0	0	0	0	0	0	0	0	0	0	0	0	0	0
KCNIP2	30819	symbol	H. sapiens	30819	H. sapiens	1	0	1	0	0	0	1	0	0	0	1	0	0	0	0	0	0	0	0	0
HSPB7	27129	symbol	H. sapiens	27129	H. sapiens	1	0	0	0	0	0	0	0	0	0	0	0	0	0	0	0	0	0	0	0
SCIN	85477	symbol	H. sapiens	85477	H. sapiens	0	0	0	0	1	1	1	0	0	0	1	1	0	0	0	0	0	0	0	0
GJA5	2702	symbol	H. sapiens	2702	H. sapiens	1	0	1	1	0	1	0	0	1	0	0	1	0	0	0	0	0	0	0	0
MTCO2P22	100289404	symbol	H. sapiens	100289404	H. sapiens	0	0	0	0	0	0	0	0	0	0	0	0	0	0	0	0	0	0	0	0
MTND4P24	100873254	symbol	H. sapiens	100873254	H. sapiens	0	0	0	0	0	0	0	0	0	0	0	0	0	0	0	0	0	0	0	0
KIAA0319	9856	symbol	H. sapiens	9856	H. sapiens	0	0	0	1	0	1	0	0	0	0	0	0	0	0	0	1	0	0	0	0
GPR160	26996	symbol	H. sapiens	26996	H. sapiens	0	0	0	0	0	0	0	0	0	0	0	0	0	0	0	0	0	0	0	0
SFRP2	6423	symbol	H. sapiens	6423	H. sapiens	1	0	0	1	0	1	0	0	0	1	0	0	1	0	0	1	1	0	0	1
NT5C1B	93034	symbol	H. sapiens	93034	H. sapiens	0	0	0	0	0	0	0	0	0	0	0	0	0	0	0	0	0	0	0	0
ACTN3	89	symbol	H. sapiens	89	H. sapiens	1	0	1	0	1	1	1	0	1	1	0	0	0	0	1	1	0	0	0	0
LINC01088	100505875	symbol	H. sapiens	100505875	H. sapiens	0	0	0	0	0	0	0	0	0	0	0	0	0	0	0	0	0	0	0	0
SOX3	6658	symbol	H. sapiens	6658	H. sapiens	0	0	0	0	0	1	0	0	1	0	0	0	1	0	0	0	0	0	0	0
B3GNT7	93010	symbol	H. sapiens	93010	H. sapiens	0	0	0	0	0	0	0	0	0	0	0	0	0	0	0	0	0	0	0	0
PNPLA1	285848	symbol	H. sapiens	285848	H. sapiens	0	0	0	0	0	0	0	0	0	0	0	0	0	0	1	0	0	0	0	0
EPHB1	2047	symbol	H. sapiens	2047	H. sapiens	0	0	0	1	0	1	0	1	1	0	1	0	0	0	0	1	0	0	0	0
MTND5P11	100506169	symbol	H. sapiens	100506169	H. sapiens	0	0	0	0	0	0	0	0	0	0	0	0	0	0	0	0	0	0	0	0
PEG10	23089	symbol	H. sapiens	23089	H. sapiens	0	0	0	1	0	1	0	0	0	0	0	0	0	0	0	0	0	0	0	0
MTND4P12	100293090	symbol	H. sapiens	100293090	H. sapiens	0	0	0	0	0	0	0	0	0	0	0	0	0	0	0	0	0	0	0	0
IFITM3	10410	symbol	H. sapiens	10410	H. sapiens	0	1	0	0	0	0	0	0	0	0	0	0	0	0	0	0	0	0	0	0
HTR4	3360	symbol	H. sapiens	3360	H. sapiens	0	0	0	0	0	0	0	0	0	0	1	0	0	0	0	0	0	0	1	0
ACP3	55	symbol	H. sapiens	55	H. sapiens	1	0	0	0	0	0	0	0	0	0	1	0	0	0	0	0	0	0	0	0
CMPK2	129607	symbol	H. sapiens	129607	H. sapiens	0	1	0	0	0	0	0	0	0	0	0	0	0	0	0	0	0	0	0	0
CNTN3	5067	symbol	H. sapiens	5067	H. sapiens	0	0	0	0	0	0	0	0	0	0	0	0	0	0	0	0	0	0	0	0
PODN	127435	symbol	H. sapiens	127435	H. sapiens	0	0	0	0	0	1	0	0	0	0	0	0	0	0	1	0	0	0	0	0
BST2	684	symbol	H. sapiens	684	H. sapiens	0	1	0	0	0	1	0	0	0	0	0	0	0	1	0	0	1	0	0	0
CPNE8	144402	symbol	H. sapiens	144402	H. sapiens	0	0	0	0	0	0	0	0	0	0	0	0	0	0	0	0	0	0	0	0
MATN3	4148	symbol	H. sapiens	4148	H. sapiens	0	0	0	0	0	1	1	1	0	0	0	0	0	0	1	0	0	0	0	0
SGO1-AS1	100874028	symbol	H. sapiens	100874028	H. sapiens	0	0	0	0	0	0	0	0	0	0	0	0	0	0	0	0	0	0	0	0
WNT5A	7474	symbol	H. sapiens	7474	H. sapiens	1	1	0	1	0	1	0	1	1	0	0	0	0	0	0	1	0	1	0	0
IFI6	2537	symbol	H. sapiens	2537	H. sapiens	1	1	1	0	0	0	0	0	0	0	0	0	0	0	0	0	1	0	0	0
DTX3L	151636	symbol	H. sapiens	151636	H. sapiens	0	1	0	0	0	0	0	0	0	0	0	0	0	1	0	1	1	1	0	0
SH3RF2	153769	symbol	H. sapiens	153769	H. sapiens	0	0	0	1	0	0	0	0	0	0	0	0	0	1	0	1	1	0	0	0
VEGFC	7424	symbol	H. sapiens	7424	H. sapiens	0	1	0	1	0	1	0	1	1	0	0	1	0	0	0	0	0	0	1	0
PANX2	56666	symbol	H. sapiens	56666	H. sapiens	1	0	1	0	0	0	0	0	0	0	0	0	0	0	1	0	0	1	0	0
ART3	419	symbol	H. sapiens	419	H. sapiens	0	0	0	0	0	0	0	0	0	0	0	0	0	0	0	0	0	0	0	0
CUBN	8029	symbol	H. sapiens	8029	H. sapiens	0	0	0	0	0	0	1	0	0	0	0	0	0	0	0	0	0	0	0	0
FGF18	8817	symbol	H. sapiens	8817	H. sapiens	0	0	0	1	0	1	0	1	0	0	0	0	0	0	0	0	0	0	1	0
RPS8P1	192133	symbol	H. sapiens	192133	H. sapiens	0	0	0	0	0	0	0	0	0	0	0	0	0	0	0	0	0	0	0	0
EPB41L4B	54566	symbol	H. sapiens	54566	H. sapiens	0	0	0	1	1	0	0	0	0	0	0	0	0	0	1	0	0	0	0	0
TENM4	26011	symbol	H. sapiens	26011	H. sapiens	1	0	0	0	0	1	0	0	0	1	1	0	0	0	0	0	0	0	0	1
ADAMTS19	171019	symbol	H. sapiens	171019	H. sapiens	0	0	0	1	0	0	0	0	0	0	0	0	0	0	0	0	0	0	0	0
ATP8	4509	symbol	H. sapiens	4509	H. sapiens	0	0	1	0	0	0	0	0	0	0	0	0	0	0	0	0	0	0	0	0
GFRA1	2674	symbol	H. sapiens	2674	H. sapiens	0	0	0	0	0	1	0	1	1	1	0	0	0	0	0	0	0	0	0	0
SCN2A	6326	symbol	H. sapiens	6326	H. sapiens	1	0	1	0	0	0	0	0	0	0	0	0	0	0	0	0	1	0	0	0
IFIT1	3434	symbol	H. sapiens	3434	H. sapiens	0	1	0	0	0	0	0	0	0	0	0	0	0	0	0	0	1	1	0	0
KCNJ3	3760	symbol	H. sapiens	3760	H. sapiens	1	0	1	0	1	0	0	0	0	0	0	1	0	0	0	0	0	0	0	0
PPP1R1C	151242	symbol	H. sapiens	151242	H. sapiens	0	0	0	0	0	0	0	0	0	0	0	0	0	1	0	0	1	0	0	0
PLPPR1	54886	symbol	H. sapiens	54886	H. sapiens	0	0	0	0	0	0	0	0	0	0	0	0	0	0	0	0	0	0	0	0
ASIC1	41	symbol	H. sapiens	41	H. sapiens	0	0	1	0	0	0	0	0	0	0	1	1	0	0	0	0	1	0	0	0
GAREM1	64762	symbol	H. sapiens	64762	H. sapiens	0	0	0	1	0	0	0	1	0	0	0	0	0	0	0	0	0	0	0	0
LOC374443	374443	Gene_ID	H. sapiens	374443	H. sapiens	0	0	0	0	0	0	0	0	0	0	0	0	0	0	0	0	0	0	0	0
KY	339855	symbol	H. sapiens	339855	H. sapiens	0	0	0	1	0	0	0	0	0	0	0	0	0	0	0	0	0	0	0	0
LOC100505501	100505501	Gene_ID	H. sapiens	100505501	H. sapiens	0	0	0	0	0	0	0	0	0	0	0	0	0	0	0	0	0	0	0	0
SMIM43	132332	symbol	H. sapiens	132332	H. sapiens	0	0	0	0	0	0	0	0	0	0	0	0	0	0	0	0	0	0	0	0
THSD7A	221981	symbol	H. sapiens	221981	H. sapiens	0	0	0	1	1	0	0	0	0	0	0	0	0	0	0	0	0	0	0	0
NECTIN1	5818	symbol	H. sapiens	5818	H. sapiens	0	0	1	0	0	1	0	0	1	1	0	0	0	0	0	0	0	0	0	0
RPS8P8	728553	symbol	H. sapiens	728553	H. sapiens	0	0	0	0	0	0	0	0	0	0	0	0	0	0	0	0	0	0	0	0
IFI16	3428	symbol	H. sapiens	3428	H. sapiens	0	1	0	0	0	0	0	0	0	0	0	0	0	0	0	0	1	1	0	0
FUT8	2530	symbol	H. sapiens	2530	H. sapiens	0	0	0	0	0	0	0	1	0	0	0	0	0	0	0	1	0	0	0	0
FNDC5	252995	symbol	H. sapiens	252995	H. sapiens	0	0	0	1	0	1	0	0	0	0	0	0	0	0	0	0	0	0	0	0
HERC6	55008	symbol	H. sapiens	55008	H. sapiens	0	1	0	0	0	0	0	0	0	0	0	0	0	0	0	0	0	0	0	0
COL14A1	7373	symbol	H. sapiens	7373	H. sapiens	0	0	0	0	0	0	0	0	0	0	0	0	0	0	1	0	0	0	0	0
SUSD4	55061	symbol	H. sapiens	55061	H. sapiens	0	1	0	0	0	0	0	0	0	0	0	0	0	0	0	0	0	1	0	0
FOXO1	2308	symbol	H. sapiens	2308	H. sapiens	1	1	0	1	0	1	0	1	0	0	0	0	0	0	0	1	1	0	0	0
NRXN1	9378	symbol	H. sapiens	9378	H. sapiens	1	0	1	0	0	1	1	0	1	1	1	0	0	0	1	0	0	0	0	0
NREP	9315	symbol	H. sapiens	9315	H. sapiens	0	0	0	1	0	0	0	0	1	0	0	0	1	0	0	0	0	0	0	0
MYO5B	4645	symbol	H. sapiens	4645	H. sapiens	1	0	0	0	1	0	0	0	0	0	0	0	0	0	0	0	0	0	0	0
LINC02517	105374374	symbol	H. sapiens	105374374	H. sapiens	0	0	0	0	0	0	0	0	0	0	0	0	0	0	0	0	0	0	0	0
STAMBPL1	57559	symbol	H. sapiens	57559	H. sapiens	0	0	0	0	0	0	0	0	0	0	0	0	0	0	0	0	0	0	0	0
PPP1R1A	5502	symbol	H. sapiens	5502	H. sapiens	0	0	0	0	0	0	0	0	0	0	0	0	0	1	0	0	1	0	0	0
BRINP3	339479	symbol	H. sapiens	339479	H. sapiens	0	0	0	1	0	0	0	0	0	0	0	0	1	0	0	0	0	0	0	0
CALN1	83698	symbol	H. sapiens	83698	H. sapiens	0	0	0	0	0	0	1	0	0	0	0	0	0	0	0	0	0	0	0	0
HEY2	23493	symbol	H. sapiens	23493	H. sapiens	1	0	0	1	0	1	0	0	1	1	0	0	1	0	0	0	0	1	0	0
IFI35	3430	symbol	H. sapiens	3430	H. sapiens	0	1	0	0	0	0	0	0	0	0	0	0	0	0	0	1	0	1	0	0
DNALI1	7802	symbol	H. sapiens	7802	H. sapiens	0	0	0	0	0	0	0	0	0	0	0	0	0	0	0	0	0	0	0	0
LRRN4	164312	symbol	H. sapiens	164312	H. sapiens	0	0	1	0	0	0	0	0	0	0	0	0	0	0	0	0	0	0	0	0
SUSD2	56241	symbol	H. sapiens	56241	H. sapiens	0	0	0	0	0	0	0	0	0	0	0	0	0	0	0	0	0	0	0	0
FABP2	2169	symbol	H. sapiens	2169	H. sapiens	0	0	0	0	0	0	0	0	0	0	0	0	0	0	0	0	0	0	0	0
SCUBE3	222663	symbol	H. sapiens	222663	H. sapiens	0	0	0	1	0	1	1	0	0	0	0	0	0	0	1	0	0	0	0	0
SNAP91	9892	symbol	H. sapiens	9892	H. sapiens	0	0	0	0	0	1	0	0	0	0	0	0	0	0	0	0	0	0	0	0
VCAM1	7412	symbol	H. sapiens	7412	H. sapiens	1	1	0	0	0	0	0	1	1	1	0	0	0	0	1	0	1	0	0	0
NIPAL1	152519	symbol	H. sapiens	152519	H. sapiens	0	0	1	0	0	0	0	0	0	0	0	0	0	0	0	0	0	0	0	0
TUBBP1	92755	symbol	H. sapiens	92755	H. sapiens	0	0	0	0	0	0	0	0	0	0	0	0	0	0	0	0	0	0	0	0
GJA1	2697	symbol	H. sapiens	2697	H. sapiens	1	0	1	1	1	1	0	1	1	0	1	1	0	0	0	0	1	0	0	0
RN7SKP80	106479130	symbol	H. sapiens	106479130	H. sapiens	0	0	0	0	0	0	0	0	0	0	0	0	0	0	0	0	0	0	0	0
S1PR3	1903	symbol	H. sapiens	1903	H. sapiens	0	0	0	0	0	1	0	0	0	1	0	0	0	0	0	0	0	1	1	0
SNORA22	677807	symbol	H. sapiens	677807	H. sapiens	0	0	0	0	0	0	0	0	0	0	0	0	0	0	0	0	0	0	0	0
COL25A1	84570	symbol	H. sapiens	84570	H. sapiens	0	0	0	0	0	0	0	0	0	0	0	0	0	0	1	0	0	0	0	0
ZBED3	84327	symbol	H. sapiens	84327	H. sapiens	0	0	0	0	1	0	0	0	0	0	0	0	0	0	0	0	0	0	0	1
SEMA6A	57556	symbol	H. sapiens	57556	H. sapiens	0	0	0	1	0	1	0	1	1	0	0	0	0	0	0	1	0	0	0	0
CACNA1G	8913	symbol	H. sapiens	8913	H. sapiens	1	0	1	0	1	0	0	0	0	0	1	1	0	0	0	0	0	0	1	0
EHD2	30846	symbol	H. sapiens	30846	H. sapiens	0	0	0	0	1	0	1	0	0	0	0	0	0	0	0	0	0	0	0	0
APBA1	320	symbol	H. sapiens	320	H. sapiens	0	0	0	0	0	1	0	0	0	0	1	1	0	0	0	0	0	0	0	0
CORIN	10699	symbol	H. sapiens	10699	H. sapiens	1	0	1	0	0	0	0	0	0	0	0	1	0	0	0	0	0	0	0	0
IFITM2	10581	symbol	H. sapiens	10581	H. sapiens	0	1	0	0	0	0	0	0	0	0	0	0	0	0	0	0	0	0	0	0

## Sheet: Enrichment
GroupID	Category	Term	Description	LogP	Log(q-value)	InTerm_InList	Genes	Symbols
1_Summary	GO Biological Processes	GO:0044057	regulation of system process	-9.27601	-4.83924	15/573	55,89,2308,2697,2702,2911,3760,8913,9378,10699,23493,26011,27129,30819,100506013,6423,7412,7474,2537,6326,56666,4645	ACP3,ACTN3,FOXO1,GJA1,GJA5,GRM1,KCNJ3,CACNA1G,NRXN1,CORIN,HEY2,TENM4,HSPB7,KCNIP2,APELA,SFRP2,VCAM1,WNT5A,IFI6,SCN2A,PANX2,MYO5B
1_Member	GO Biological Processes	GO:0044057	regulation of system process	-9.27601	-4.83924	15/573	55,89,2308,2697,2702,2911,3760,8913,9378,10699,23493,26011,27129,30819,100506013	ACP3,ACTN3,FOXO1,GJA1,GJA5,GRM1,KCNJ3,CACNA1G,NRXN1,CORIN,HEY2,TENM4,HSPB7,KCNIP2,APELA
1_Member	GO Biological Processes	GO:0008016	regulation of heart contraction	-7.58532	-3.44959	9/207	2697,2702,3760,8913,10699,23493,27129,30819,100506013	GJA1,GJA5,KCNJ3,CACNA1G,CORIN,HEY2,HSPB7,KCNIP2,APELA
1_Member	GO Biological Processes	GO:1903522	regulation of blood circulation	-6.79661	-2.9619	9/256	2697,2702,3760,8913,10699,23493,27129,30819,100506013	GJA1,GJA5,KCNJ3,CACNA1G,CORIN,HEY2,HSPB7,KCNIP2,APELA
1_Member	GO Biological Processes	GO:0060371	regulation of atrial cardiac muscle cell membrane depolarization	-5.40818	-1.9987	3/10	2697,2702,8913	GJA1,GJA5,CACNA1G
1_Member	GO Biological Processes	GO:0003161	cardiac conduction system development	-5.19842	-1.8756	4/37	2697,2702,8913,23493	GJA1,GJA5,CACNA1G,HEY2
1_Member	GO Biological Processes	GO:0007507	heart development	-4.96483	-1.81627	10/542	2697,2702,6423,7412,7474,8913,23493,26011,27129,100506013	GJA1,GJA5,SFRP2,VCAM1,WNT5A,CACNA1G,HEY2,TENM4,HSPB7,APELA
1_Member	GO Biological Processes	GO:0086065	cell communication involved in cardiac conduction	-4.93339	-1.81627	4/43	2697,2702,3760,8913	GJA1,GJA5,KCNJ3,CACNA1G
1_Member	GO Biological Processes	GO:0086066	atrial cardiac muscle cell to AV node cell communication	-4.83447	-1.75943	3/15	2697,2702,3760	GJA1,GJA5,KCNJ3
1_Member	GO Biological Processes	GO:0003254	regulation of membrane depolarization	-4.77774	-1.73892	4/47	2537,2697,2702,8913	IFI6,GJA1,GJA5,CACNA1G
1_Member	GO Biological Processes	GO:0086001	cardiac muscle cell action potential	-4.70513	-1.68334	4/49	2697,3760,8913,30819	GJA1,KCNJ3,CACNA1G,KCNIP2
1_Member	GO Biological Processes	GO:0048738	cardiac muscle tissue development	-4.65745	-1.65205	6/173	2697,2702,7474,8913,23493,26011	GJA1,GJA5,WNT5A,CACNA1G,HEY2,TENM4
1_Member	GO Biological Processes	GO:0035637	multicellular organismal signaling	-4.40791	-1.50262	5/116	2697,2702,3760,6326,8913	GJA1,GJA5,KCNJ3,SCN2A,CACNA1G
1_Member	GO Biological Processes	GO:0061337	cardiac conduction	-4.19177	-1.32321	4/66	2697,2702,3760,8913	GJA1,GJA5,KCNJ3,CACNA1G
1_Member	GO Biological Processes	GO:0086019	cell-cell signaling involved in cardiac conduction	-4.03863	-1.23463	3/27	2697,3760,8913	GJA1,KCNJ3,CACNA1G
1_Member	GO Molecular Functions	GO:0022829	wide pore channel activity	-3.8993	-1.14504	3/30	2697,2702,56666	GJA1,GJA5,PANX2
1_Member	GO Biological Processes	GO:0086002	cardiac muscle cell action potential involved in contraction	-3.58986	-0.938423	3/38	2697,3760,8913	GJA1,KCNJ3,CACNA1G
1_Member	GO Biological Processes	GO:0030048	actin filament-based movement	-3.54321	-0.905782	4/97	2697,3760,4645,8913	GJA1,KCNJ3,MYO5B,CACNA1G
1_Member	GO Biological Processes	GO:0003012	muscle system process	-3.50058	-0.883359	6/281	89,2697,3760,8913,23493,30819	ACTN3,GJA1,KCNJ3,CACNA1G,HEY2,KCNIP2
1_Member	GO Biological Processes	GO:0014706	striated muscle tissue development	-3.45179	-0.860123	6/287	2697,2702,7474,8913,23493,26011	GJA1,GJA5,WNT5A,CACNA1G,HEY2,TENM4
1_Member	GO Biological Processes	GO:0086003	cardiac muscle cell contraction	-3.42975	-0.850315	3/43	2697,3760,8913	GJA1,KCNJ3,CACNA1G
1_Member	GO Biological Processes	GO:0060537	muscle tissue development	-3.30471	-0.79499	6/306	2697,2702,7474,8913,23493,26011	GJA1,GJA5,WNT5A,CACNA1G,HEY2,TENM4
1_Member	GO Biological Processes	GO:0006936	muscle contraction	-3.05423	-0.621769	5/227	89,2697,3760,8913,30819	ACTN3,GJA1,KCNJ3,CACNA1G,KCNIP2
1_Member	GO Biological Processes	GO:0070252	actin-mediated cell contraction	-2.86516	-0.5183	3/67	2697,3760,8913	GJA1,KCNJ3,CACNA1G
1_Member	GO Biological Processes	GO:0060048	cardiac muscle contraction	-2.72421	-0.42098	3/75	2697,3760,8913	GJA1,KCNJ3,CACNA1G
1_Member	GO Biological Processes	GO:0060047	heart contraction	-2.472	-0.26054	3/92	2697,3760,8913	GJA1,KCNJ3,CACNA1G
1_Member	GO Biological Processes	GO:0070167	regulation of biomineral tissue development	-2.35823	-0.183911	3/101	89,2697,23493	ACTN3,GJA1,HEY2
1_Member	GO Biological Processes	GO:0110149	regulation of biomineralization	-2.33445	-0.167194	3/103	89,2697,23493	ACTN3,GJA1,HEY2
1_Member	GO Biological Processes	GO:0002027	regulation of heart rate	-2.31117	-0.15996	3/105	3760,8913,23493	KCNJ3,CACNA1G,HEY2
1_Member	GO Biological Processes	GO:0006941	striated muscle contraction	-2.29971	-0.159611	3/106	2697,3760,8913	GJA1,KCNJ3,CACNA1G
1_Member	GO Biological Processes	GO:0003015	heart process	-2.27715	-0.150987	3/108	2697,3760,8913	GJA1,KCNJ3,CACNA1G
2_Summary	Reactome Gene Sets	R-HSA-909733	Interferon alpha/beta signaling	-6.95612	-2.99647	6/70	684,2537,3430,3434,10410,10581,7412,55008,129607,3428,151636,7474,55061,2308,7424	BST2,IFI6,IFI35,IFIT1,IFITM3,IFITM2,VCAM1,HERC6,CMPK2,IFI16,DTX3L,WNT5A,SUSD4,FOXO1,VEGFC
2_Member	Reactome Gene Sets	R-HSA-909733	Interferon alpha/beta signaling	-6.95612	-2.99647	6/70	684,2537,3430,3434,10410,10581	BST2,IFI6,IFI35,IFIT1,IFITM3,IFITM2
2_Member	Hallmark Gene Sets	M5913	HALLMARK INTERFERON GAMMA RESPONSE	-6.5184	-2.78061	8/200	684,3430,3434,7412,10410,10581,55008,129607	BST2,IFI35,IFIT1,VCAM1,IFITM3,IFITM2,HERC6,CMPK2
2_Member	Hallmark Gene Sets	M5911	HALLMARK INTERFERON ALPHA RESPONSE	-6.10953	-2.45091	6/97	684,3430,10410,10581,55008,129607	BST2,IFI35,IFITM3,IFITM2,HERC6,CMPK2
2_Member	GO Biological Processes	GO:0045071	negative regulation of viral genome replication	-5.9256	-2.36219	5/57	684,3428,3434,10410,10581	BST2,IFI16,IFIT1,IFITM3,IFITM2
2_Member	GO Biological Processes	GO:0035456	response to interferon-beta	-5.45704	-1.9987	4/32	684,3428,10410,10581	BST2,IFI16,IFITM3,IFITM2
2_Member	Reactome Gene Sets	R-HSA-913531	Interferon Signaling	-5.39407	-1.9987	7/199	684,2537,3430,3434,7412,10410,10581	BST2,IFI6,IFI35,IFIT1,VCAM1,IFITM3,IFITM2
2_Member	GO Biological Processes	GO:0045069	regulation of viral genome replication	-5.01326	-1.81627	5/87	684,3428,3434,10410,10581	BST2,IFI16,IFIT1,IFITM3,IFITM2
2_Member	GO Biological Processes	GO:0051607	defense response to virus	-4.92255	-1.81627	7/235	684,2537,3428,3434,10410,10581,151636	BST2,IFI6,IFI16,IFIT1,IFITM3,IFITM2,DTX3L
2_Member	GO Biological Processes	GO:0048525	negative regulation of viral process	-4.91783	-1.81627	5/91	684,3428,3434,10410,10581	BST2,IFI16,IFIT1,IFITM3,IFITM2
2_Member	GO Biological Processes	GO:0140546	defense response to symbiont	-4.91061	-1.81627	7/236	684,2537,3428,3434,10410,10581,151636	BST2,IFI6,IFI16,IFIT1,IFITM3,IFITM2,DTX3L
2_Member	GO Biological Processes	GO:0035455	response to interferon-alpha	-4.44069	-1.52244	3/20	684,10410,10581	BST2,IFITM3,IFITM2
2_Member	GO Biological Processes	GO:0071357	cellular response to type I interferon	-4.44069	-1.52244	3/20	3434,10410,10581	IFIT1,IFITM3,IFITM2
2_Member	GO Biological Processes	GO:1903901	negative regulation of viral life cycle	-4.08876	-1.25406	3/26	684,10410,10581	BST2,IFITM3,IFITM2
2_Member	GO Biological Processes	GO:1903900	regulation of viral life cycle	-4.03429	-1.23463	5/139	684,3428,3434,10410,10581	BST2,IFI16,IFIT1,IFITM3,IFITM2
2_Member	GO Biological Processes	GO:0034340	response to type I interferon	-3.99044	-1.20688	3/28	3434,10410,10581	IFIT1,IFITM3,IFITM2
2_Member	GO Biological Processes	GO:0009615	response to virus	-3.89161	-1.14504	7/342	684,2537,3428,3434,10410,10581,151636	BST2,IFI6,IFI16,IFIT1,IFITM3,IFITM2,DTX3L
2_Member	GO Biological Processes	GO:0050792	regulation of viral process	-3.76053	-1.05615	5/159	684,3428,3434,10410,10581	BST2,IFI16,IFIT1,IFITM3,IFITM2
2_Member	GO Biological Processes	GO:0045087	innate immune response	-3.71977	-1.02337	10/764	684,2537,3428,3430,3434,7474,10410,10581,55061,151636	BST2,IFI6,IFI16,IFI35,IFIT1,WNT5A,IFITM3,IFITM2,SUSD4,DTX3L
2_Member	WikiPathways	WP4877	Host-pathogen interaction of human coronaviruses - MAPK signaling	-3.66026	-0.979365	3/36	684,10410,10581	BST2,IFITM3,IFITM2
2_Member	GO Biological Processes	GO:0034341	response to interferon-gamma	-3.13961	-0.666632	4/124	684,7474,10410,10581	BST2,WNT5A,IFITM3,IFITM2
2_Member	Reactome Gene Sets	R-HSA-1280215	Cytokine Signaling in Immune system	-2.63867	-0.357238	8/715	684,2308,2537,3430,3434,7412,10410,10581	BST2,FOXO1,IFI6,IFI35,IFIT1,VCAM1,IFITM3,IFITM2
2_Member	GO Biological Processes	GO:0034097	response to cytokine	-2.34689	-0.177292	8/799	684,3428,3434,7412,7424,7474,10410,10581	BST2,IFI16,IFIT1,VCAM1,VEGFC,WNT5A,IFITM3,IFITM2
2_Member	WikiPathways	WP5115	Network map of SARS-CoV-2 signaling pathway	-2.22991	-0.125586	4/221	684,2537,3434,10410	BST2,IFI6,IFIT1,IFITM3
2_Member	GO Biological Processes	GO:0071345	cellular response to cytokine stimulus	-2.09692	-0.0367337	7/703	3428,3434,7412,7424,7474,10410,10581	IFI16,IFIT1,VCAM1,VEGFC,WNT5A,IFITM3,IFITM2
3_Summary	GO Biological Processes	GO:0042391	regulation of membrane potential	-5.89586	-2.36219	10/425	41,2537,2697,2702,2911,3760,6326,8913,9378,30819,4509,56666,5818,152519,89,10699,164312	ASIC1,IFI6,GJA1,GJA5,GRM1,KCNJ3,SCN2A,CACNA1G,NRXN1,KCNIP2,ATP8,PANX2,NECTIN1,NIPAL1,ACTN3,CORIN,LRRN4
3_Member	GO Biological Processes	GO:0042391	regulation of membrane potential	-5.89586	-2.36219	10/425	41,2537,2697,2702,2911,3760,6326,8913,9378,30819	ASIC1,IFI6,GJA1,GJA5,GRM1,KCNJ3,SCN2A,CACNA1G,NRXN1,KCNIP2
3_Member	GO Biological Processes	GO:0001508	action potential	-4.78279	-1.73892	5/97	2697,3760,6326,8913,30819	GJA1,KCNJ3,SCN2A,CACNA1G,KCNIP2
3_Member	GO Molecular Functions	GO:0015267	channel activity	-4.569	-1.60231	9/480	41,2697,2702,3760,4509,6326,8913,30819,56666	ASIC1,GJA1,GJA5,KCNJ3,ATP8,SCN2A,CACNA1G,KCNIP2,PANX2
3_Member	GO Molecular Functions	GO:0022803	passive transmembrane transporter activity	-4.56195	-1.60231	9/481	41,2697,2702,3760,4509,6326,8913,30819,56666	ASIC1,GJA1,GJA5,KCNJ3,ATP8,SCN2A,CACNA1G,KCNIP2,PANX2
3_Member	GO Molecular Functions	GO:0005272	sodium channel activity	-3.34289	-0.797697	3/46	41,6326,8913	ASIC1,SCN2A,CACNA1G
3_Member	GO Molecular Functions	GO:0005261	cation channel activity	-3.0995	-0.645008	6/335	41,3760,4509,6326,8913,30819	ASIC1,KCNJ3,ATP8,SCN2A,CACNA1G,KCNIP2
3_Member	GO Biological Processes	GO:0030001	metal ion transport	-3.0687	-0.623162	8/611	41,2702,3760,5818,6326,8913,30819,152519	ASIC1,GJA5,KCNJ3,NECTIN1,SCN2A,CACNA1G,KCNIP2,NIPAL1
3_Member	GO Biological Processes	GO:0098662	inorganic cation transmembrane transport	-2.58287	-0.327949	7/571	41,3760,4509,6326,8913,30819,152519	ASIC1,KCNJ3,ATP8,SCN2A,CACNA1G,KCNIP2,NIPAL1
3_Member	GO Molecular Functions	GO:0046873	metal ion transmembrane transporter activity	-2.56114	-0.318777	6/428	41,3760,6326,8913,30819,152519	ASIC1,KCNJ3,SCN2A,CACNA1G,KCNIP2,NIPAL1
3_Member	GO Molecular Functions	GO:0005216	ion channel activity	-2.54124	-0.308593	6/432	41,3760,4509,6326,8913,30819	ASIC1,KCNJ3,ATP8,SCN2A,CACNA1G,KCNIP2
3_Member	GO Molecular Functions	GO:0022890	inorganic cation transmembrane transporter activity	-2.48025	-0.2662	7/596	41,3760,4509,6326,8913,30819,152519	ASIC1,KCNJ3,ATP8,SCN2A,CACNA1G,KCNIP2,NIPAL1
3_Member	Reactome Gene Sets	R-HSA-397014	Muscle contraction	-2.40554	-0.216742	4/197	89,6326,10699,30819	ACTN3,SCN2A,CORIN,KCNIP2
3_Member	GO Molecular Functions	GO:0005244	voltage-gated ion channel activity	-2.37461	-0.195522	4/201	3760,6326,8913,30819	KCNJ3,SCN2A,CACNA1G,KCNIP2
3_Member	GO Molecular Functions	GO:0022832	voltage-gated channel activity	-2.37461	-0.195522	4/201	3760,6326,8913,30819	KCNJ3,SCN2A,CACNA1G,KCNIP2
3_Member	GO Biological Processes	GO:0098660	inorganic ion transmembrane transport	-2.32341	-0.161846	7/637	41,3760,4509,6326,8913,30819,152519	ASIC1,KCNJ3,ATP8,SCN2A,CACNA1G,KCNIP2,NIPAL1
3_Member	GO Biological Processes	GO:0098655	cation transmembrane transport	-2.31245	-0.15996	7/640	41,3760,4509,6326,8913,30819,152519	ASIC1,KCNJ3,ATP8,SCN2A,CACNA1G,KCNIP2,NIPAL1
3_Member	GO Biological Processes	GO:0034765	regulation of ion transmembrane transport	-2.30587	-0.159611	6/483	2697,2702,3760,6326,8913,30819	GJA1,GJA5,KCNJ3,SCN2A,CACNA1G,KCNIP2
3_Member	GO Molecular Functions	GO:0022836	gated channel activity	-2.29478	-0.156863	5/340	41,3760,6326,8913,30819	ASIC1,KCNJ3,SCN2A,CACNA1G,KCNIP2
3_Member	GO Molecular Functions	GO:0008324	cation transmembrane transporter activity	-2.27641	-0.150987	7/650	41,3760,4509,6326,8913,30819,152519	ASIC1,KCNJ3,ATP8,SCN2A,CACNA1G,KCNIP2,NIPAL1
3_Member	GO Biological Processes	GO:0035725	sodium ion transmembrane transport	-2.14088	-0.0677241	3/121	41,6326,8913	ASIC1,SCN2A,CACNA1G
3_Member	GO Biological Processes	GO:0007613	memory	-2.13107	-0.065376	3/122	41,6326,164312	ASIC1,SCN2A,LRRN4
3_Member	Reactome Gene Sets	R-HSA-5576891	Cardiac conduction	-2.06486	-0.0101067	3/129	6326,10699,30819	SCN2A,CORIN,KCNIP2
3_Member	GO Molecular Functions	GO:0015318	inorganic molecular entity transmembrane transporter activity	-2.00623	0	7/732	41,3760,4509,6326,8913,30819,152519	ASIC1,KCNJ3,ATP8,SCN2A,CACNA1G,KCNIP2,NIPAL1
4_Summary	GO Biological Processes	GO:0001568	blood vessel development	-5.24693	-1.88934	10/503	2047,2308,2697,2702,6423,7424,8817,23493,221981,100506013,7474,9315,23089,57556,222663,2911,64762,153769,9856,171019,339479,339855,252995,54566	EPHB1,FOXO1,GJA1,GJA5,SFRP2,VEGFC,FGF18,HEY2,THSD7A,APELA,WNT5A,NREP,PEG10,SEMA6A,SCUBE3,GRM1,GAREM1,SH3RF2,KIAA0319,ADAMTS19,BRINP3,KY,FNDC5,EPB41L4B
4_Member	GO Biological Processes	GO:0001568	blood vessel development	-5.24693	-1.88934	10/503	2047,2308,2697,2702,6423,7424,8817,23493,221981,100506013	EPHB1,FOXO1,GJA1,GJA5,SFRP2,VEGFC,FGF18,HEY2,THSD7A,APELA
4_Member	GO Biological Processes	GO:0001944	vasculature development	-5.0776	-1.81627	10/526	2047,2308,2697,2702,6423,7424,8817,23493,221981,100506013	EPHB1,FOXO1,GJA1,GJA5,SFRP2,VEGFC,FGF18,HEY2,THSD7A,APELA
4_Member	GO Biological Processes	GO:0090287	regulation of cellular response to growth factor stimulus	-5.05979	-1.81627	8/314	6423,7424,7474,8817,9315,23089,57556,222663	SFRP2,VEGFC,WNT5A,FGF18,NREP,PEG10,SEMA6A,SCUBE3
4_Member	GO Biological Processes	GO:0048514	blood vessel morphogenesis	-5.0347	-1.81627	9/419	2047,2697,2702,6423,7424,8817,23493,221981,100506013	EPHB1,GJA1,GJA5,SFRP2,VEGFC,FGF18,HEY2,THSD7A,APELA
4_Member	GO Biological Processes	GO:0035239	tube morphogenesis	-4.23372	-1.35326	10/661	2047,2697,2702,6423,7424,7474,8817,23493,221981,100506013	EPHB1,GJA1,GJA5,SFRP2,VEGFC,WNT5A,FGF18,HEY2,THSD7A,APELA
4_Member	GO Biological Processes	GO:0043408	regulation of MAPK cascade	-4.10029	-1.25459	10/686	2047,2308,2911,6423,7474,8817,57556,64762,153769,100506013	EPHB1,FOXO1,GRM1,SFRP2,WNT5A,FGF18,SEMA6A,GAREM1,SH3RF2,APELA
4_Member	GO Biological Processes	GO:0001525	angiogenesis	-4.06208	-1.2381	7/321	2047,2702,6423,7424,8817,221981,100506013	EPHB1,GJA5,SFRP2,VEGFC,FGF18,THSD7A,APELA
4_Member	GO Biological Processes	GO:0090092	regulation of transmembrane receptor protein serine/threonine kinase signaling pathway	-3.61922	-0.960603	6/267	6423,7474,9315,9856,23089,222663	SFRP2,WNT5A,NREP,KIAA0319,PEG10,SCUBE3
4_Member	GO Biological Processes	GO:0045766	positive regulation of angiogenesis	-3.47817	-0.87962	5/183	6423,7424,7474,8817,100506013	SFRP2,VEGFC,WNT5A,FGF18,APELA
4_Member	GO Biological Processes	GO:1904018	positive regulation of vasculature development	-3.47817	-0.87962	5/183	6423,7424,7474,8817,100506013	SFRP2,VEGFC,WNT5A,FGF18,APELA
4_Member	Canonical Pathways	M5885	NABA MATRISOME ASSOCIATED	-3.11983	-0.654576	9/751	6423,7424,7474,8817,57556,171019,222663,339479,339855	SFRP2,VEGFC,WNT5A,FGF18,SEMA6A,ADAMTS19,SCUBE3,BRINP3,KY
4_Member	Canonical Pathways	M5883	NABA SECRETED FACTORS	-3.04654	-0.621769	6/343	6423,7424,7474,8817,222663,339479	SFRP2,VEGFC,WNT5A,FGF18,SCUBE3,BRINP3
4_Member	GO Biological Processes	GO:0045765	regulation of angiogenesis	-3.03352	-0.613788	6/345	6423,7424,7474,8817,57556,100506013	SFRP2,VEGFC,WNT5A,FGF18,SEMA6A,APELA
4_Member	GO Biological Processes	GO:1901342	regulation of vasculature development	-2.99501	-0.587622	6/351	6423,7424,7474,8817,57556,100506013	SFRP2,VEGFC,WNT5A,FGF18,SEMA6A,APELA
4_Member	GO Molecular Functions	GO:0048018	receptor ligand activity	-2.96382	-0.572375	7/489	6423,7424,7474,8817,57556,252995,100506013	SFRP2,VEGFC,WNT5A,FGF18,SEMA6A,FNDC5,APELA
4_Member	GO Molecular Functions	GO:0030546	signaling receptor activator activity	-2.92829	-0.559495	7/496	6423,7424,7474,8817,57556,252995,100506013	SFRP2,VEGFC,WNT5A,FGF18,SEMA6A,FNDC5,APELA
4_Member	GO Molecular Functions	GO:0030545	signaling receptor regulator activity	-2.70032	-0.403431	7/544	6423,7424,7474,8817,57556,252995,100506013	SFRP2,VEGFC,WNT5A,FGF18,SEMA6A,FNDC5,APELA
4_Member	GO Biological Processes	GO:0030335	positive regulation of cell migration	-2.62986	-0.352045	7/560	7424,7474,8817,54566,57556,153769,100506013	VEGFC,WNT5A,FGF18,EPB41L4B,SEMA6A,SH3RF2,APELA
4_Member	GO Biological Processes	GO:0010634	positive regulation of epithelial cell migration	-2.59845	-0.33487	4/174	7424,7474,8817,54566	VEGFC,WNT5A,FGF18,EPB41L4B
4_Member	GO Biological Processes	GO:2000147	positive regulation of cell motility	-2.52881	-0.301556	7/584	7424,7474,8817,54566,57556,153769,100506013	VEGFC,WNT5A,FGF18,EPB41L4B,SEMA6A,SH3RF2,APELA
4_Member	GO Biological Processes	GO:0051272	positive regulation of cellular component movement	-2.48025	-0.2662	7/596	7424,7474,8817,54566,57556,153769,100506013	VEGFC,WNT5A,FGF18,EPB41L4B,SEMA6A,SH3RF2,APELA
4_Member	GO Biological Processes	GO:0040017	positive regulation of locomotion	-2.46831	-0.259427	7/599	7424,7474,8817,54566,57556,153769,100506013	VEGFC,WNT5A,FGF18,EPB41L4B,SEMA6A,SH3RF2,APELA
4_Member	GO Biological Processes	GO:0070372	regulation of ERK1 and ERK2 cascade	-2.45777	-0.259046	5/311	2047,8817,57556,64762,100506013	EPHB1,FGF18,SEMA6A,GAREM1,APELA
4_Member	GO Biological Processes	GO:0043410	positive regulation of MAPK cascade	-2.276	-0.150987	6/490	2911,7474,8817,64762,153769,100506013	GRM1,WNT5A,FGF18,GAREM1,SH3RF2,APELA
4_Member	GO Biological Processes	GO:0001938	positive regulation of endothelial cell proliferation	-2.24415	-0.133722	3/111	7424,7474,100506013	VEGFC,WNT5A,APELA
4_Member	GO Biological Processes	GO:0050920	regulation of chemotaxis	-2.20279	-0.105332	4/225	7424,7474,8817,57556	VEGFC,WNT5A,FGF18,SEMA6A
4_Member	GO Biological Processes	GO:0010595	positive regulation of endothelial cell migration	-2.04667	0	3/131	7424,7474,8817	VEGFC,WNT5A,FGF18
4_Member	GO Biological Processes	GO:0045667	regulation of osteoblast differentiation	-2.00253	0	3/136	6423,7424,222663	SFRP2,VEGFC,SCUBE3
5_Summary	GO Biological Processes	GO:0030029	actin filament-based process	-4.57454	-1.60231	10/602	89,2697,3760,4645,8913,30846,54566,84327,85477,221981	ACTN3,GJA1,KCNJ3,MYO5B,CACNA1G,EHD2,EPB41L4B,ZBED3,SCIN,THSD7A
5_Member	GO Biological Processes	GO:0030029	actin filament-based process	-4.57454	-1.60231	10/602	89,2697,3760,4645,8913,30846,54566,84327,85477,221981	ACTN3,GJA1,KCNJ3,MYO5B,CACNA1G,EHD2,EPB41L4B,ZBED3,SCIN,THSD7A
5_Member	GO Biological Processes	GO:0030036	actin cytoskeleton organization	-2.71834	-0.418296	7/540	89,4645,30846,54566,84327,85477,221981	ACTN3,MYO5B,EHD2,EPB41L4B,ZBED3,SCIN,THSD7A
6_Summary	GO Biological Processes	GO:0030308	negative regulation of cell growth	-4.48065	-1.53525	6/186	684,2697,6423,7474,9856,57556,2702,23493,1903,2047,2308,6658,7424,9378,26011,89,2674,252995,8817,85477,4148,127435,5818,100506013,222663,9892,320,23089	BST2,GJA1,SFRP2,WNT5A,KIAA0319,SEMA6A,GJA5,HEY2,S1PR3,EPHB1,FOXO1,SOX3,VEGFC,NRXN1,TENM4,ACTN3,GFRA1,FNDC5,FGF18,SCIN,MATN3,PODN,NECTIN1,APELA,SCUBE3,SNAP91,APBA1,PEG10
6_Member	GO Biological Processes	GO:0030308	negative regulation of cell growth	-4.48065	-1.53525	6/186	684,2697,6423,7474,9856,57556	BST2,GJA1,SFRP2,WNT5A,KIAA0319,SEMA6A
6_Member	GO Biological Processes	GO:0003283	atrial septum development	-4.25245	-1.35975	3/23	2702,7474,23493	GJA5,WNT5A,HEY2
6_Member	GO Biological Processes	GO:0045596	negative regulation of cell differentiation	-4.10551	-1.25459	10/685	1903,2047,2308,6423,6658,7424,7474,9856,23493,57556	S1PR3,EPHB1,FOXO1,SFRP2,SOX3,VEGFC,WNT5A,KIAA0319,HEY2,SEMA6A
6_Member	GO Biological Processes	GO:0051960	regulation of nervous system development	-4.02795	-1.23463	8/439	2047,7424,7474,9378,9856,23493,26011,57556	EPHB1,VEGFC,WNT5A,NRXN1,KIAA0319,HEY2,TENM4,SEMA6A
6_Member	GO Biological Processes	GO:0003151	outflow tract morphogenesis	-3.95209	-1.18742	4/76	2702,6423,7474,23493	GJA5,SFRP2,WNT5A,HEY2
6_Member	GO Biological Processes	GO:0045926	negative regulation of growth	-3.82072	-1.09153	6/245	684,2697,6423,7474,9856,57556	BST2,GJA1,SFRP2,WNT5A,KIAA0319,SEMA6A
6_Member	GO Biological Processes	GO:0060284	regulation of cell development	-3.64249	-0.969156	8/500	89,1903,7424,7474,9856,23493,26011,57556	ACTN3,S1PR3,VEGFC,WNT5A,KIAA0319,HEY2,TENM4,SEMA6A
6_Member	GO Biological Processes	GO:0003230	cardiac atrium development	-3.62455	-0.960603	3/37	2702,7474,23493	GJA5,WNT5A,HEY2
6_Member	GO Biological Processes	GO:0030517	negative regulation of axon extension	-3.4001	-0.826844	3/44	7474,9856,57556	WNT5A,KIAA0319,SEMA6A
6_Member	GO Biological Processes	GO:0003231	cardiac ventricle development	-3.11362	-0.654576	4/126	2702,6423,7474,23493	GJA5,SFRP2,WNT5A,HEY2
6_Member	GO Biological Processes	GO:0042733	embryonic digit morphogenesis	-3.04705	-0.621769	3/58	2697,6423,7474	GJA1,SFRP2,WNT5A
6_Member	GO Biological Processes	GO:0008584	male gonad development	-3.00201	-0.587622	4/135	2674,2697,6423,7474	GFRA1,GJA1,SFRP2,WNT5A
6_Member	GO Biological Processes	GO:0046546	development of primary male sexual characteristics	-2.99011	-0.586769	4/136	2674,2697,6423,7474	GFRA1,GJA1,SFRP2,WNT5A
6_Member	GO Biological Processes	GO:0050767	regulation of neurogenesis	-2.93251	-0.559495	6/361	7424,7474,9856,23493,26011,57556	VEGFC,WNT5A,KIAA0319,HEY2,TENM4,SEMA6A
6_Member	GO Biological Processes	GO:0050771	negative regulation of axonogenesis	-2.92273	-0.559495	3/64	7474,9856,57556	WNT5A,KIAA0319,SEMA6A
6_Member	GO Biological Processes	GO:0045598	regulation of fat cell differentiation	-2.92071	-0.559495	4/142	2308,6423,7474,252995	FOXO1,SFRP2,WNT5A,FNDC5
6_Member	GO Biological Processes	GO:0003007	heart morphogenesis	-2.86823	-0.5183	5/250	2697,2702,6423,7474,23493	GJA1,GJA5,SFRP2,WNT5A,HEY2
6_Member	GO Biological Processes	GO:0040008	regulation of growth	-2.85529	-0.51543	8/660	89,684,2697,6423,7474,9856,23493,57556	ACTN3,BST2,GJA1,SFRP2,WNT5A,KIAA0319,HEY2,SEMA6A
6_Member	GO Biological Processes	GO:0061035	regulation of cartilage development	-2.81029	-0.477325	3/70	7474,8817,85477	WNT5A,FGF18,SCIN
6_Member	GO Biological Processes	GO:0051216	cartilage development	-2.76053	-0.438383	4/157	4148,6423,7474,8817	MATN3,SFRP2,WNT5A,FGF18
6_Member	GO Biological Processes	GO:0003281	ventricular septum development	-2.75788	-0.438383	3/73	2702,7474,23493	GJA5,WNT5A,HEY2
6_Member	GO Biological Processes	GO:0046661	male sex differentiation	-2.74047	-0.427555	4/159	2674,2697,6423,7474	GFRA1,GJA1,SFRP2,WNT5A
6_Member	GO Biological Processes	GO:0040013	negative regulation of locomotion	-2.72903	-0.42098	6/396	684,2697,6423,7474,57556,127435	BST2,GJA1,SFRP2,WNT5A,SEMA6A,PODN
6_Member	GO Biological Processes	GO:0002088	lens development in camera-type eye	-2.67547	-0.384833	3/78	2697,5818,7474	GJA1,NECTIN1,WNT5A
6_Member	GO Biological Processes	GO:0003205	cardiac chamber development	-2.66294	-0.378465	4/167	2702,6423,7474,23493	GJA5,SFRP2,WNT5A,HEY2
6_Member	GO Biological Processes	GO:0001558	regulation of cell growth	-2.62744	-0.352045	6/415	684,2697,6423,7474,9856,57556	BST2,GJA1,SFRP2,WNT5A,KIAA0319,SEMA6A
6_Member	GO Biological Processes	GO:0048608	reproductive structure development	-2.60678	-0.337327	6/419	2674,2697,6423,7474,23493,100506013	GFRA1,GJA1,SFRP2,WNT5A,HEY2,APELA
6_Member	GO Biological Processes	GO:0035050	embryonic heart tube development	-2.59857	-0.33487	3/83	2697,7474,100506013	GJA1,WNT5A,APELA
6_Member	GO Biological Processes	GO:0061458	reproductive system development	-2.59143	-0.330758	6/422	2674,2697,6423,7474,23493,100506013	GFRA1,GJA1,SFRP2,WNT5A,HEY2,APELA
6_Member	GO Biological Processes	GO:0010721	negative regulation of cell development	-2.53682	-0.306874	4/181	1903,7474,9856,57556	S1PR3,WNT5A,KIAA0319,SEMA6A
6_Member	GO Biological Processes	GO:0030516	regulation of axon extension	-2.45877	-0.259046	3/93	7474,9856,57556	WNT5A,KIAA0319,SEMA6A
6_Member	GO Biological Processes	GO:0060349	bone morphogenesis	-2.40737	-0.216742	3/97	89,6423,8817	ACTN3,SFRP2,FGF18
6_Member	GO Biological Processes	GO:0060348	bone development	-2.39774	-0.211391	4/198	89,2697,6423,8817	ACTN3,GJA1,SFRP2,FGF18
6_Member	GO Biological Processes	GO:0048638	regulation of developmental growth	-2.35457	-0.182617	5/329	89,7474,9856,23493,57556	ACTN3,WNT5A,KIAA0319,HEY2,SEMA6A
6_Member	GO Biological Processes	GO:0061448	connective tissue development	-2.32215	-0.161846	4/208	4148,6423,7474,8817	MATN3,SFRP2,WNT5A,FGF18
6_Member	GO Biological Processes	GO:0030510	regulation of BMP signaling pathway	-2.31117	-0.15996	3/105	6423,7474,222663	SFRP2,WNT5A,SCUBE3
6_Member	GO Biological Processes	GO:0003279	cardiac septum development	-2.29971	-0.159611	3/106	2702,7474,23493	GJA5,WNT5A,HEY2
6_Member	Reactome Gene Sets	R-HSA-8856825	Cargo recognition for clathrin-mediated endocytosis	-2.29971	-0.159611	3/106	7474,9856,9892	WNT5A,KIAA0319,SNAP91
6_Member	GO Biological Processes	GO:0061387	regulation of extent of cell growth	-2.27715	-0.150987	3/108	7474,9856,57556	WNT5A,KIAA0319,SEMA6A
6_Member	GO Biological Processes	GO:0008406	gonad development	-2.25761	-0.136288	4/217	2674,2697,6423,7474	GFRA1,GJA1,SFRP2,WNT5A
6_Member	GO Biological Processes	GO:0001501	skeletal system development	-2.25499	-0.136288	6/495	89,2697,4148,6423,7474,8817	ACTN3,GJA1,MATN3,SFRP2,WNT5A,FGF18
6_Member	GO Biological Processes	GO:0048640	negative regulation of developmental growth	-2.24415	-0.133722	3/111	7474,9856,57556	WNT5A,KIAA0319,SEMA6A
6_Member	GO Biological Processes	GO:0045137	development of primary sexual characteristics	-2.22308	-0.120768	4/222	2674,2697,6423,7474	GFRA1,GJA1,SFRP2,WNT5A
6_Member	GO Biological Processes	GO:0090288	negative regulation of cellular response to growth factor stimulus	-2.20165	-0.105332	3/115	6423,7474,57556	SFRP2,WNT5A,SEMA6A
6_Member	GO Biological Processes	GO:0030278	regulation of ossification	-2.17084	-0.0812052	3/118	89,2697,7474	ACTN3,GJA1,WNT5A
6_Member	GO Biological Processes	GO:0060485	mesenchyme development	-2.16967	-0.0812052	4/230	6423,7474,23493,57556	SFRP2,WNT5A,HEY2,SEMA6A
6_Member	GO Biological Processes	GO:0030326	embryonic limb morphogenesis	-2.16076	-0.0800184	3/119	2697,6423,7474	GJA1,SFRP2,WNT5A
6_Member	GO Biological Processes	GO:0035113	embryonic appendage morphogenesis	-2.16076	-0.0800184	3/119	2697,6423,7474	GJA1,SFRP2,WNT5A
6_Member	WikiPathways	WP4787	Osteoblast differentiation and related diseases	-2.15077	-0.0719412	3/120	7474,8817,23493	WNT5A,FGF18,HEY2
6_Member	GO Biological Processes	GO:0048589	developmental growth	-2.14777	-0.0708419	5/369	320,2697,6423,7474,26011	APBA1,GJA1,SFRP2,WNT5A,TENM4
6_Member	GO Biological Processes	GO:0030010	establishment of cell polarity	-2.14088	-0.0677241	3/121	2047,2697,7474	EPHB1,GJA1,WNT5A
6_Member	GO Biological Processes	GO:0040007	growth	-2.13816	-0.0668799	5/371	320,2697,6423,7474,26011	APBA1,GJA1,SFRP2,WNT5A,TENM4
6_Member	GO Biological Processes	GO:0003206	cardiac chamber morphogenesis	-2.09273	-0.0343645	3/126	6423,7474,23493	SFRP2,WNT5A,HEY2
6_Member	GO Biological Processes	GO:0048729	tissue morphogenesis	-2.02592	0	6/554	2697,6423,7424,7474,23493,100506013	GJA1,SFRP2,VEGFC,WNT5A,HEY2,APELA
6_Member	GO Biological Processes	GO:0090101	negative regulation of transmembrane receptor protein serine/threonine kinase signaling pathway	-2.01121	0	3/135	6423,7474,23089	SFRP2,WNT5A,PEG10
6_Member	GO Biological Processes	GO:0010977	negative regulation of neuron projection development	-2.00253	0	3/136	7474,9856,57556	WNT5A,KIAA0319,SEMA6A
7_Summary	GO Molecular Functions	GO:0005509	calcium ion binding	-3.96274	-1.18873	10/713	89,4148,8029,9378,30819,30846,83698,85477,222663,440279	ACTN3,MATN3,CUBN,NRXN1,KCNIP2,EHD2,CALN1,SCIN,SCUBE3,UNC13C
7_Member	GO Molecular Functions	GO:0005509	calcium ion binding	-3.96274	-1.18873	10/713	89,4148,8029,9378,30819,30846,83698,85477,222663,440279	ACTN3,MATN3,CUBN,NRXN1,KCNIP2,EHD2,CALN1,SCIN,SCUBE3,UNC13C
8_Summary	GO Biological Processes	GO:0071363	cellular response to growth factor stimulus	-3.86271	-1.12491	8/464	2530,2674,7412,7424,7474,8817,57556,64762,2697,4148,2047,2308	FUT8,GFRA1,VCAM1,VEGFC,WNT5A,FGF18,SEMA6A,GAREM1,GJA1,MATN3,EPHB1,FOXO1
8_Member	GO Biological Processes	GO:0071363	cellular response to growth factor stimulus	-3.86271	-1.12491	8/464	2530,2674,7412,7424,7474,8817,57556,64762	FUT8,GFRA1,VCAM1,VEGFC,WNT5A,FGF18,SEMA6A,GAREM1
8_Member	GO Biological Processes	GO:0070848	response to growth factor	-3.6838	-0.995219	8/493	2530,2674,7412,7424,7474,8817,57556,64762	FUT8,GFRA1,VCAM1,VEGFC,WNT5A,FGF18,SEMA6A,GAREM1
8_Member	Hallmark Gene Sets	M5930	HALLMARK EPITHELIAL MESENCHYMAL TRANSITION	-3.30202	-0.79499	5/200	2697,4148,7412,7424,7474	GJA1,MATN3,VCAM1,VEGFC,WNT5A
8_Member	GO Biological Processes	GO:0035924	cellular response to vascular endothelial growth factor stimulus	-3.26183	-0.76955	3/49	7412,7424,57556	VCAM1,VEGFC,SEMA6A
8_Member	GO Biological Processes	GO:0007169	transmembrane receptor protein tyrosine kinase signaling pathway	-2.69093	-0.397178	6/403	2047,2308,2674,7424,8817,64762	EPHB1,FOXO1,GFRA1,VEGFC,FGF18,GAREM1
8_Member	GO Biological Processes	GO:2000177	regulation of neural precursor cell proliferation	-2.5692	-0.319951	3/85	2308,7424,7474	FOXO1,VEGFC,WNT5A
8_Member	GO Biological Processes	GO:0007167	enzyme linked receptor protein signaling pathway	-2.46039	-0.259046	7/601	2047,2308,2530,2674,7424,8817,64762	EPHB1,FOXO1,FUT8,GFRA1,VEGFC,FGF18,GAREM1
8_Member	KEGG Pathway	hsa04933	AGE-RAGE signaling pathway in diabetic complications	-2.37031	-0.193614	3/100	2308,7412,7424	FOXO1,VCAM1,VEGFC
9_Summary	GO Biological Processes	GO:0034330	cell junction organization	-3.80579	-1.08661	8/473	89,2047,2697,2702,5818,7474,9378,440279,57556,7412,7424,9315,2674,6658,23493	ACTN3,EPHB1,GJA1,GJA5,NECTIN1,WNT5A,NRXN1,UNC13C,SEMA6A,VCAM1,VEGFC,NREP,GFRA1,SOX3,HEY2
9_Member	GO Biological Processes	GO:0034330	cell junction organization	-3.80579	-1.08661	8/473	89,2047,2697,2702,5818,7474,9378,440279	ACTN3,EPHB1,GJA1,GJA5,NECTIN1,WNT5A,NRXN1,UNC13C
9_Member	GO Biological Processes	GO:0051963	regulation of synapse assembly	-3.44379	-0.858281	4/103	2047,5818,7474,9378	EPHB1,NECTIN1,WNT5A,NRXN1
9_Member	GO Biological Processes	GO:0007411	axon guidance	-3.05423	-0.621769	5/227	2047,5818,7474,9378,57556	EPHB1,NECTIN1,WNT5A,NRXN1,SEMA6A
9_Member	GO Biological Processes	GO:0097485	neuron projection guidance	-3.0457	-0.621769	5/228	2047,5818,7474,9378,57556	EPHB1,NECTIN1,WNT5A,NRXN1,SEMA6A
9_Member	GO Biological Processes	GO:0006935	chemotaxis	-2.8786	-0.521016	7/506	2047,5818,7412,7424,7474,9378,57556	EPHB1,NECTIN1,VCAM1,VEGFC,WNT5A,NRXN1,SEMA6A
9_Member	GO Biological Processes	GO:0042330	taxis	-2.85906	-0.515718	7/510	2047,5818,7412,7424,7474,9378,57556	EPHB1,NECTIN1,VCAM1,VEGFC,WNT5A,NRXN1,SEMA6A
9_Member	GO Biological Processes	GO:0061564	axon development	-2.81926	-0.482865	6/380	2047,5818,7474,9315,9378,57556	EPHB1,NECTIN1,WNT5A,NREP,NRXN1,SEMA6A
9_Member	GO Biological Processes	GO:0034329	cell junction assembly	-2.80073	-0.471176	5/259	89,2697,2702,7474,9378	ACTN3,GJA1,GJA5,WNT5A,NRXN1
9_Member	GO Biological Processes	GO:0099173	postsynapse organization	-2.51264	-0.290715	3/89	2047,7474,9378	EPHB1,WNT5A,NRXN1
9_Member	GO Biological Processes	GO:1901888	regulation of cell junction assembly	-2.37461	-0.195522	4/201	2047,5818,7474,9378	EPHB1,NECTIN1,WNT5A,NRXN1
9_Member	GO Biological Processes	GO:0050807	regulation of synapse organization	-2.32952	-0.164594	4/207	2047,5818,7474,9378	EPHB1,NECTIN1,WNT5A,NRXN1
9_Member	GO Biological Processes	GO:0031175	neuron projection development	-2.3161	-0.15996	7/639	2047,2674,5818,7474,9315,9378,57556	EPHB1,GFRA1,NECTIN1,WNT5A,NREP,NRXN1,SEMA6A
9_Member	GO Biological Processes	GO:0050803	regulation of synapse structure or activity	-2.28591	-0.150987	4/213	2047,5818,7474,9378	EPHB1,NECTIN1,WNT5A,NRXN1
9_Member	GO Biological Processes	GO:0007409	axonogenesis	-2.28416	-0.150987	5/342	2047,5818,7474,9378,57556	EPHB1,NECTIN1,WNT5A,NRXN1,SEMA6A
9_Member	GO Biological Processes	GO:0048593	camera-type eye morphogenesis	-2.13107	-0.065376	3/122	2047,5818,7474	EPHB1,NECTIN1,WNT5A
9_Member	GO Biological Processes	GO:0007423	sensory organ development	-2.03679	0	6/551	2047,2697,5818,6658,7474,23493	EPHB1,GJA1,NECTIN1,SOX3,WNT5A,HEY2
10_Summary	GO Molecular Functions	GO:0005178	integrin binding	-3.7991	-1.08661	5/156	89,1903,2674,6423,7412,5818,9378,26011,23493	ACTN3,S1PR3,GFRA1,SFRP2,VCAM1,NECTIN1,NRXN1,TENM4,HEY2
10_Member	GO Molecular Functions	GO:0005178	integrin binding	-3.7991	-1.08661	5/156	89,1903,2674,6423,7412	ACTN3,S1PR3,GFRA1,SFRP2,VCAM1
10_Member	GO Molecular Functions	GO:0050839	cell adhesion molecule binding	-3.33026	-0.796588	8/557	89,1903,2674,5818,6423,7412,9378,26011	ACTN3,S1PR3,GFRA1,NECTIN1,SFRP2,VCAM1,NRXN1,TENM4
10_Member	GO Biological Processes	GO:0007157	heterophilic cell-cell adhesion via plasma membrane cell adhesion molecules	-3.31526	-0.79499	3/47	5818,7412,26011	NECTIN1,VCAM1,TENM4
10_Member	GO Biological Processes	GO:0035051	cardiocyte differentiation	-2.20165	-0.105332	3/115	7412,23493,26011	VCAM1,HEY2,TENM4
11_Summary	GO Biological Processes	GO:0015800	acidic amino acid transport	-3.55612	-0.911744	3/39	320,2697,2911,3360,8913,9378,30819,440279,55,26011,85477,41,2047	APBA1,GJA1,GRM1,HTR4,CACNA1G,NRXN1,KCNIP2,UNC13C,ACP3,TENM4,SCIN,ASIC1,EPHB1
11_Member	GO Biological Processes	GO:0015800	acidic amino acid transport	-3.55612	-0.911744	3/39	320,2697,2911	APBA1,GJA1,GRM1
11_Member	GO Biological Processes	GO:0007268	chemical synaptic transmission	-3.50377	-0.883359	7/396	320,2911,3360,8913,9378,30819,440279	APBA1,GRM1,HTR4,CACNA1G,NRXN1,KCNIP2,UNC13C
11_Member	GO Biological Processes	GO:0098916	anterograde trans-synaptic signaling	-3.50377	-0.883359	7/396	320,2911,3360,8913,9378,30819,440279	APBA1,GRM1,HTR4,CACNA1G,NRXN1,KCNIP2,UNC13C
11_Member	GO Biological Processes	GO:0099537	trans-synaptic signaling	-3.39438	-0.826844	7/413	320,2911,3360,8913,9378,30819,440279	APBA1,GRM1,HTR4,CACNA1G,NRXN1,KCNIP2,UNC13C
11_Member	GO Biological Processes	GO:0099536	synaptic signaling	-3.2196	-0.741879	7/442	320,2911,3360,8913,9378,30819,440279	APBA1,GRM1,HTR4,CACNA1G,NRXN1,KCNIP2,UNC13C
11_Member	Reactome Gene Sets	R-HSA-6794361	Neurexins and neuroligins	-3.11445	-0.654576	3/55	320,2911,9378	APBA1,GRM1,NRXN1
11_Member	GO Biological Processes	GO:0031644	regulation of nervous system process	-2.96661	-0.572375	4/138	55,2911,9378,26011	ACP3,GRM1,NRXN1,TENM4
11_Member	GO Biological Processes	GO:0006835	dicarboxylic acid transport	-2.86516	-0.5183	3/67	320,2697,2911	APBA1,GJA1,GRM1
11_Member	GO Biological Processes	GO:0140352	export from cell	-2.58635	-0.328559	6/423	320,2697,9378,30819,85477,440279	APBA1,GJA1,NRXN1,KCNIP2,SCIN,UNC13C
11_Member	GO Biological Processes	GO:0050804	modulation of chemical synaptic transmission	-2.56114	-0.318777	6/428	41,320,2047,2911,9378,440279	ASIC1,APBA1,EPHB1,GRM1,NRXN1,UNC13C
11_Member	GO Biological Processes	GO:0099177	regulation of trans-synaptic signaling	-2.55615	-0.318777	6/429	41,320,2047,2911,9378,440279	ASIC1,APBA1,EPHB1,GRM1,NRXN1,UNC13C
11_Member	Reactome Gene Sets	R-HSA-6794362	Protein-protein interactions at synapses	-2.55479	-0.318777	3/86	320,2911,9378	APBA1,GRM1,NRXN1
11_Member	GO Biological Processes	GO:0001505	regulation of neurotransmitter levels	-2.30029	-0.159611	4/211	41,320,9378,440279	ASIC1,APBA1,NRXN1,UNC13C
11_Member	GO Biological Processes	GO:0006865	amino acid transport	-2.18101	-0.088639	3/117	320,2697,2911	APBA1,GJA1,GRM1
11_Member	GO Biological Processes	GO:0032940	secretion by cell	-2.13338	-0.065376	5/372	320,2697,9378,85477,440279	APBA1,GJA1,NRXN1,SCIN,UNC13C
12_Summary	GO Biological Processes	GO:0008015	blood circulation	-3.47754	-0.87962	7/400	2697,2702,3760,6518,7424,8913,10699,41,320,85477	GJA1,GJA5,KCNJ3,SLC2A5,VEGFC,CACNA1G,CORIN,ASIC1,APBA1,SCIN
12_Member	GO Biological Processes	GO:0008015	blood circulation	-3.47754	-0.87962	7/400	2697,2702,3760,6518,7424,8913,10699	GJA1,GJA5,KCNJ3,SLC2A5,VEGFC,CACNA1G,CORIN
12_Member	GO Biological Processes	GO:0003013	circulatory system process	-2.94852	-0.56362	7/492	2697,2702,3760,6518,7424,8913,10699	GJA1,GJA5,KCNJ3,SLC2A5,VEGFC,CACNA1G,CORIN
12_Member	GO Biological Processes	GO:0008217	regulation of blood pressure	-2.5197	-0.29512	4/183	2702,6518,7424,10699	GJA5,SLC2A5,VEGFC,CORIN
12_Member	GO Biological Processes	GO:0051046	regulation of secretion	-2.44074	-0.244518	7/606	41,320,2697,7424,8913,10699,85477	ASIC1,APBA1,GJA1,VEGFC,CACNA1G,CORIN,SCIN
12_Member	GO Biological Processes	GO:0003073	regulation of systemic arterial blood pressure	-2.43277	-0.239046	3/95	2702,6518,10699	GJA5,SLC2A5,CORIN
13_Summary	GO Biological Processes	GO:0045664	regulation of neuron differentiation	-3.38274	-0.821032	5/192	6423,6658,9315,23493,339479	SFRP2,SOX3,NREP,HEY2,BRINP3
13_Member	GO Biological Processes	GO:0045664	regulation of neuron differentiation	-3.38274	-0.821032	5/192	6423,6658,9315,23493,339479	SFRP2,SOX3,NREP,HEY2,BRINP3
14_Summary	GO Molecular Functions	GO:0004864	protein phosphatase inhibitor activity	-3.34289	-0.797697	3/46	5502,151242,153769,684,151636	PPP1R1A,PPP1R1C,SH3RF2,BST2,DTX3L
14_Member	GO Molecular Functions	GO:0004864	protein phosphatase inhibitor activity	-3.34289	-0.797697	3/46	5502,151242,153769	PPP1R1A,PPP1R1C,SH3RF2
14_Member	GO Molecular Functions	GO:0019212	phosphatase inhibitor activity	-3.26183	-0.76955	3/49	5502,151242,153769	PPP1R1A,PPP1R1C,SH3RF2
14_Member	GO Molecular Functions	GO:0019888	protein phosphatase regulator activity	-2.45877	-0.259046	3/93	5502,151242,153769	PPP1R1A,PPP1R1C,SH3RF2
14_Member	GO Molecular Functions	GO:0019208	phosphatase regulator activity	-2.24415	-0.133722	3/111	5502,151242,153769	PPP1R1A,PPP1R1C,SH3RF2
14_Member	GO Molecular Functions	GO:0004857	enzyme inhibitor activity	-2.04989	0	5/390	684,5502,151242,151636,153769	BST2,PPP1R1A,PPP1R1C,DTX3L,SH3RF2
15_Summary	Reactome Gene Sets	R-HSA-1474244	Extracellular matrix organization	-3.34237	-0.797697	6/301	4148,7373,7412,9378,84570,222663,89,54566,56666,127435,285848	MATN3,COL14A1,VCAM1,NRXN1,COL25A1,SCUBE3,ACTN3,EPB41L4B,PANX2,PODN,PNPLA1
15_Member	Reactome Gene Sets	R-HSA-1474244	Extracellular matrix organization	-3.34237	-0.797697	6/301	4148,7373,7412,9378,84570,222663	MATN3,COL14A1,VCAM1,NRXN1,COL25A1,SCUBE3
15_Member	GO Molecular Functions	GO:0005198	structural molecule activity	-2.66881	-0.381262	8/707	89,4148,7373,54566,56666,84570,127435,285848	ACTN3,MATN3,COL14A1,EPB41L4B,PANX2,COL25A1,PODN,PNPLA1
15_Member	GO Molecular Functions	GO:0005201	extracellular matrix structural constituent	-2.61657	-0.344161	4/172	4148,7373,84570,127435	MATN3,COL14A1,COL25A1,PODN
16_Summary	GO Biological Processes	GO:0032872	regulation of stress-activated MAPK cascade	-3.33186	-0.796588	5/197	2047,2308,6423,7474,153769,2530,9856,151636,57556,89,3430	EPHB1,FOXO1,SFRP2,WNT5A,SH3RF2,FUT8,KIAA0319,DTX3L,SEMA6A,ACTN3,IFI35
16_Member	GO Biological Processes	GO:0032872	regulation of stress-activated MAPK cascade	-3.33186	-0.796588	5/197	2047,2308,6423,7474,153769	EPHB1,FOXO1,SFRP2,WNT5A,SH3RF2
16_Member	GO Biological Processes	GO:0070302	regulation of stress-activated protein kinase signaling cascade	-3.30202	-0.79499	5/200	2047,2308,6423,7474,153769	EPHB1,FOXO1,SFRP2,WNT5A,SH3RF2
16_Member	GO Biological Processes	GO:0032873	negative regulation of stress-activated MAPK cascade	-3.23598	-0.753457	3/50	2308,6423,153769	FOXO1,SFRP2,SH3RF2
16_Member	GO Biological Processes	GO:0070303	negative regulation of stress-activated protein kinase signaling cascade	-3.23598	-0.753457	3/50	2308,6423,153769	FOXO1,SFRP2,SH3RF2
16_Member	GO Biological Processes	GO:0046328	regulation of JNK cascade	-2.94348	-0.56362	4/140	2047,6423,7474,153769	EPHB1,SFRP2,WNT5A,SH3RF2
16_Member	GO Biological Processes	GO:0080135	regulation of cellular response to stress	-2.72654	-0.42098	8/692	2047,2308,2530,6423,7474,9856,151636,153769	EPHB1,FOXO1,FUT8,SFRP2,WNT5A,KIAA0319,DTX3L,SH3RF2
16_Member	GO Biological Processes	GO:0043409	negative regulation of MAPK cascade	-2.55415	-0.318777	4/179	2308,6423,57556,153769	FOXO1,SFRP2,SEMA6A,SH3RF2
16_Member	GO Biological Processes	GO:1902532	negative regulation of intracellular signal transduction	-2.06617	-0.0101067	6/543	89,2308,3430,6423,57556,153769	ACTN3,FOXO1,IFI35,SFRP2,SEMA6A,SH3RF2
17_Summary	GO Biological Processes	GO:0071214	cellular response to abiotic stimulus	-3.29726	-0.79499	6/307	41,2697,2911,3428,6326,6423,684,2537,3434,5502,151242,151636,153769,2308,7412	ASIC1,GJA1,GRM1,IFI16,SCN2A,SFRP2,BST2,IFI6,IFIT1,PPP1R1A,PPP1R1C,DTX3L,SH3RF2,FOXO1,VCAM1
17_Member	GO Biological Processes	GO:0071214	cellular response to abiotic stimulus	-3.29726	-0.79499	6/307	41,2697,2911,3428,6326,6423	ASIC1,GJA1,GRM1,IFI16,SCN2A,SFRP2
17_Member	GO Biological Processes	GO:0104004	cellular response to environmental stimulus	-3.29726	-0.79499	6/307	41,2697,2911,3428,6326,6423	ASIC1,GJA1,GRM1,IFI16,SCN2A,SFRP2
17_Member	GO Biological Processes	GO:0043086	negative regulation of catalytic activity	-2.98113	-0.581795	9/786	684,2537,3428,3434,5502,6423,151242,151636,153769	BST2,IFI6,IFI16,IFIT1,PPP1R1A,SFRP2,PPP1R1C,DTX3L,SH3RF2
17_Member	GO Biological Processes	GO:2000117	negative regulation of cysteine-type endopeptidase activity	-2.5692	-0.319951	3/85	2537,3428,6423	IFI6,IFI16,SFRP2
17_Member	GO Biological Processes	GO:0031668	cellular response to extracellular stimulus	-2.12468	-0.060823	4/237	2308,3428,6423,7412	FOXO1,IFI16,SFRP2,VCAM1
17_Member	GO Biological Processes	GO:0010951	negative regulation of endopeptidase activity	-2.0392	0	4/251	684,2537,3428,6423	BST2,IFI6,IFI16,SFRP2
18_Summary	GO Biological Processes	GO:0032652	regulation of interleukin-1 production	-3.07547	-0.625473	4/129	1903,3428,7474,56666,3430,3434,55061,151636,23493	S1PR3,IFI16,WNT5A,PANX2,IFI35,IFIT1,SUSD4,DTX3L,HEY2
18_Member	GO Biological Processes	GO:0032652	regulation of interleukin-1 production	-3.07547	-0.625473	4/129	1903,3428,7474,56666	S1PR3,IFI16,WNT5A,PANX2
18_Member	GO Biological Processes	GO:0002831	regulation of response to biotic stimulus	-2.99501	-0.587622	6/351	3428,3430,3434,7474,55061,151636	IFI16,IFI35,IFIT1,WNT5A,SUSD4,DTX3L
18_Member	GO Biological Processes	GO:0032732	positive regulation of interleukin-1 production	-2.75788	-0.438383	3/73	3428,7474,56666	IFI16,WNT5A,PANX2
18_Member	GO Biological Processes	GO:0032651	regulation of interleukin-1 beta production	-2.25504	-0.136288	3/110	1903,3428,7474	S1PR3,IFI16,WNT5A
18_Member	GO Biological Processes	GO:0045088	regulation of innate immune response	-2.16314	-0.0800184	4/231	3428,3430,7474,55061	IFI16,IFI35,WNT5A,SUSD4
18_Member	GO Biological Processes	GO:0051098	regulation of binding	-2.16232	-0.0800184	5/366	3428,3434,7474,23493,151636	IFI16,IFIT1,WNT5A,HEY2,DTX3L
19_Summary	KEGG Pathway	hsa04020	Calcium signaling pathway	-2.94658	-0.56362	5/240	2911,3360,7424,8817,8913,1903	GRM1,HTR4,VEGFC,FGF18,CACNA1G,S1PR3
19_Member	KEGG Pathway	hsa04020	Calcium signaling pathway	-2.94658	-0.56362	5/240	2911,3360,7424,8817,8913	GRM1,HTR4,VEGFC,FGF18,CACNA1G
19_Member	GO Biological Processes	GO:0007193	adenylate cyclase-inhibiting G protein-coupled receptor signaling pathway	-2.74092	-0.427555	3/74	1903,2911,3360	S1PR3,GRM1,HTR4
20_Summary	GO Biological Processes	GO:0045995	regulation of embryonic development	-2.92273	-0.559495	3/64	6423,26011,84327	SFRP2,TENM4,ZBED3
20_Member	GO Biological Processes	GO:0045995	regulation of embryonic development	-2.92273	-0.559495	3/64	6423,26011,84327	SFRP2,TENM4,ZBED3

## Sheet: Sheet1
GroupID	Category	Term	Description	LogP	Log(q-value)	InTerm_InList	Genes	Symbols
1_Summary	GO Biological Processes	GO:0044057	regulation of system process	-9.27601	-4.83924	15/573	55,89,2308,2697,2702,2911,3760,8913,9378,10699,23493,26011,27129,30819,100506013,6423,7412,7474,2537,6326,56666,4645	ACP3,ACTN3,FOXO1,GJA1,GJA5,GRM1,KCNJ3,CACNA1G,NRXN1,CORIN,HEY2,TENM4,HSPB7,KCNIP2,APELA,SFRP2,VCAM1,WNT5A,IFI6,SCN2A,PANX2,MYO5B
1_Member	GO Biological Processes	GO:0044057	regulation of system process	-9.27601	-4.83924	15/573	55,89,2308,2697,2702,2911,3760,8913,9378,10699,23493,26011,27129,30819,100506013	ACP3,ACTN3,FOXO1,GJA1,GJA5,GRM1,KCNJ3,CACNA1G,NRXN1,CORIN,HEY2,TENM4,HSPB7,KCNIP2,APELA
1_Member	GO Biological Processes	GO:0008016	regulation of heart contraction	-7.58532	-3.44959	9/207	2697,2702,3760,8913,10699,23493,27129,30819,100506013	GJA1,GJA5,KCNJ3,CACNA1G,CORIN,HEY2,HSPB7,KCNIP2,APELA
1_Member	GO Biological Processes	GO:1903522	regulation of blood circulation	-6.79661	-2.9619	9/256	2697,2702,3760,8913,10699,23493,27129,30819,100506013	GJA1,GJA5,KCNJ3,CACNA1G,CORIN,HEY2,HSPB7,KCNIP2,APELA
1_Member	GO Biological Processes	GO:0060371	regulation of atrial cardiac muscle cell membrane depolarization	-5.40818	-1.9987	3/10	2697,2702,8913	GJA1,GJA5,CACNA1G
1_Member	GO Biological Processes	GO:0003161	cardiac conduction system development	-5.19842	-1.8756	4/37	2697,2702,8913,23493	GJA1,GJA5,CACNA1G,HEY2
1_Member	GO Biological Processes	GO:0007507	heart development	-4.96483	-1.81627	10/542	2697,2702,6423,7412,7474,8913,23493,26011,27129,100506013	GJA1,GJA5,SFRP2,VCAM1,WNT5A,CACNA1G,HEY2,TENM4,HSPB7,APELA
1_Member	GO Biological Processes	GO:0086065	cell communication involved in cardiac conduction	-4.93339	-1.81627	4/43	2697,2702,3760,8913	GJA1,GJA5,KCNJ3,CACNA1G
1_Member	GO Biological Processes	GO:0086066	atrial cardiac muscle cell to AV node cell communication	-4.83447	-1.75943	3/15	2697,2702,3760	GJA1,GJA5,KCNJ3
1_Member	GO Biological Processes	GO:0003254	regulation of membrane depolarization	-4.77774	-1.73892	4/47	2537,2697,2702,8913	IFI6,GJA1,GJA5,CACNA1G
1_Member	GO Biological Processes	GO:0086001	cardiac muscle cell action potential	-4.70513	-1.68334	4/49	2697,3760,8913,30819	GJA1,KCNJ3,CACNA1G,KCNIP2
1_Member	GO Biological Processes	GO:0048738	cardiac muscle tissue development	-4.65745	-1.65205	6/173	2697,2702,7474,8913,23493,26011	GJA1,GJA5,WNT5A,CACNA1G,HEY2,TENM4
1_Member	GO Biological Processes	GO:0035637	multicellular organismal signaling	-4.40791	-1.50262	5/116	2697,2702,3760,6326,8913	GJA1,GJA5,KCNJ3,SCN2A,CACNA1G
1_Member	GO Biological Processes	GO:0061337	cardiac conduction	-4.19177	-1.32321	4/66	2697,2702,3760,8913	GJA1,GJA5,KCNJ3,CACNA1G
1_Member	GO Biological Processes	GO:0086019	cell-cell signaling involved in cardiac conduction	-4.03863	-1.23463	3/27	2697,3760,8913	GJA1,KCNJ3,CACNA1G
1_Member	GO Molecular Functions	GO:0022829	wide pore channel activity	-3.8993	-1.14504	3/30	2697,2702,56666	GJA1,GJA5,PANX2
1_Member	GO Biological Processes	GO:0086002	cardiac muscle cell action potential involved in contraction	-3.58986	-0.938423	3/38	2697,3760,8913	GJA1,KCNJ3,CACNA1G
1_Member	GO Biological Processes	GO:0030048	actin filament-based movement	-3.54321	-0.905782	4/97	2697,3760,4645,8913	GJA1,KCNJ3,MYO5B,CACNA1G
1_Member	GO Biological Processes	GO:0003012	muscle system process	-3.50058	-0.883359	6/281	89,2697,3760,8913,23493,30819	ACTN3,GJA1,KCNJ3,CACNA1G,HEY2,KCNIP2
1_Member	GO Biological Processes	GO:0014706	striated muscle tissue development	-3.45179	-0.860123	6/287	2697,2702,7474,8913,23493,26011	GJA1,GJA5,WNT5A,CACNA1G,HEY2,TENM4
1_Member	GO Biological Processes	GO:0086003	cardiac muscle cell contraction	-3.42975	-0.850315	3/43	2697,3760,8913	GJA1,KCNJ3,CACNA1G
1_Member	GO Biological Processes	GO:0060537	muscle tissue development	-3.30471	-0.79499	6/306	2697,2702,7474,8913,23493,26011	GJA1,GJA5,WNT5A,CACNA1G,HEY2,TENM4
1_Member	GO Biological Processes	GO:0006936	muscle contraction	-3.05423	-0.621769	5/227	89,2697,3760,8913,30819	ACTN3,GJA1,KCNJ3,CACNA1G,KCNIP2
1_Member	GO Biological Processes	GO:0070252	actin-mediated cell contraction	-2.86516	-0.5183	3/67	2697,3760,8913	GJA1,KCNJ3,CACNA1G
1_Member	GO Biological Processes	GO:0060048	cardiac muscle contraction	-2.72421	-0.42098	3/75	2697,3760,8913	GJA1,KCNJ3,CACNA1G
1_Member	GO Biological Processes	GO:0060047	heart contraction	-2.472	-0.26054	3/92	2697,3760,8913	GJA1,KCNJ3,CACNA1G
1_Member	GO Biological Processes	GO:0070167	regulation of biomineral tissue development	-2.35823	-0.183911	3/101	89,2697,23493	ACTN3,GJA1,HEY2
1_Member	GO Biological Processes	GO:0110149	regulation of biomineralization	-2.33445	-0.167194	3/103	89,2697,23493	ACTN3,GJA1,HEY2
1_Member	GO Biological Processes	GO:0002027	regulation of heart rate	-2.31117	-0.15996	3/105	3760,8913,23493	KCNJ3,CACNA1G,HEY2
1_Member	GO Biological Processes	GO:0006941	striated muscle contraction	-2.29971	-0.159611	3/106	2697,3760,8913	GJA1,KCNJ3,CACNA1G
1_Member	GO Biological Processes	GO:0003015	heart process	-2.27715	-0.150987	3/108	2697,3760,8913	GJA1,KCNJ3,CACNA1G
2_Summary	Reactome Gene Sets	R-HSA-909733	Interferon alpha/beta signaling	-6.95612	-2.99647	6/70	684,2537,3430,3434,10410,10581,7412,55008,129607,3428,151636,7474,55061,2308,7424	BST2,IFI6,IFI35,IFIT1,IFITM3,IFITM2,VCAM1,HERC6,CMPK2,IFI16,DTX3L,WNT5A,SUSD4,FOXO1,VEGFC
2_Member	Reactome Gene Sets	R-HSA-909733	Interferon alpha/beta signaling	-6.95612	-2.99647	6/70	684,2537,3430,3434,10410,10581	BST2,IFI6,IFI35,IFIT1,IFITM3,IFITM2
2_Member	Hallmark Gene Sets	M5913	HALLMARK INTERFERON GAMMA RESPONSE	-6.5184	-2.78061	8/200	684,3430,3434,7412,10410,10581,55008,129607	BST2,IFI35,IFIT1,VCAM1,IFITM3,IFITM2,HERC6,CMPK2
2_Member	Hallmark Gene Sets	M5911	HALLMARK INTERFERON ALPHA RESPONSE	-6.10953	-2.45091	6/97	684,3430,10410,10581,55008,129607	BST2,IFI35,IFITM3,IFITM2,HERC6,CMPK2
2_Member	GO Biological Processes	GO:0045071	negative regulation of viral genome replication	-5.9256	-2.36219	5/57	684,3428,3434,10410,10581	BST2,IFI16,IFIT1,IFITM3,IFITM2
2_Member	GO Biological Processes	GO:0035456	response to interferon-beta	-5.45704	-1.9987	4/32	684,3428,10410,10581	BST2,IFI16,IFITM3,IFITM2
2_Member	Reactome Gene Sets	R-HSA-913531	Interferon Signaling	-5.39407	-1.9987	7/199	684,2537,3430,3434,7412,10410,10581	BST2,IFI6,IFI35,IFIT1,VCAM1,IFITM3,IFITM2
2_Member	GO Biological Processes	GO:0045069	regulation of viral genome replication	-5.01326	-1.81627	5/87	684,3428,3434,10410,10581	BST2,IFI16,IFIT1,IFITM3,IFITM2
2_Member	GO Biological Processes	GO:0051607	defense response to virus	-4.92255	-1.81627	7/235	684,2537,3428,3434,10410,10581,151636	BST2,IFI6,IFI16,IFIT1,IFITM3,IFITM2,DTX3L
2_Member	GO Biological Processes	GO:0048525	negative regulation of viral process	-4.91783	-1.81627	5/91	684,3428,3434,10410,10581	BST2,IFI16,IFIT1,IFITM3,IFITM2
2_Member	GO Biological Processes	GO:0140546	defense response to symbiont	-4.91061	-1.81627	7/236	684,2537,3428,3434,10410,10581,151636	BST2,IFI6,IFI16,IFIT1,IFITM3,IFITM2,DTX3L
2_Member	GO Biological Processes	GO:0035455	response to interferon-alpha	-4.44069	-1.52244	3/20	684,10410,10581	BST2,IFITM3,IFITM2
2_Member	GO Biological Processes	GO:0071357	cellular response to type I interferon	-4.44069	-1.52244	3/20	3434,10410,10581	IFIT1,IFITM3,IFITM2
2_Member	GO Biological Processes	GO:1903901	negative regulation of viral life cycle	-4.08876	-1.25406	3/26	684,10410,10581	BST2,IFITM3,IFITM2
2_Member	GO Biological Processes	GO:1903900	regulation of viral life cycle	-4.03429	-1.23463	5/139	684,3428,3434,10410,10581	BST2,IFI16,IFIT1,IFITM3,IFITM2
2_Member	GO Biological Processes	GO:0034340	response to type I interferon	-3.99044	-1.20688	3/28	3434,10410,10581	IFIT1,IFITM3,IFITM2
2_Member	GO Biological Processes	GO:0009615	response to virus	-3.89161	-1.14504	7/342	684,2537,3428,3434,10410,10581,151636	BST2,IFI6,IFI16,IFIT1,IFITM3,IFITM2,DTX3L
2_Member	GO Biological Processes	GO:0050792	regulation of viral process	-3.76053	-1.05615	5/159	684,3428,3434,10410,10581	BST2,IFI16,IFIT1,IFITM3,IFITM2
2_Member	GO Biological Processes	GO:0045087	innate immune response	-3.71977	-1.02337	10/764	684,2537,3428,3430,3434,7474,10410,10581,55061,151636	BST2,IFI6,IFI16,IFI35,IFIT1,WNT5A,IFITM3,IFITM2,SUSD4,DTX3L
2_Member	WikiPathways	WP4877	Host-pathogen interaction of human coronaviruses - MAPK signaling	-3.66026	-0.979365	3/36	684,10410,10581	BST2,IFITM3,IFITM2
2_Member	GO Biological Processes	GO:0034341	response to interferon-gamma	-3.13961	-0.666632	4/124	684,7474,10410,10581	BST2,WNT5A,IFITM3,IFITM2
2_Member	Reactome Gene Sets	R-HSA-1280215	Cytokine Signaling in Immune system	-2.63867	-0.357238	8/715	684,2308,2537,3430,3434,7412,10410,10581	BST2,FOXO1,IFI6,IFI35,IFIT1,VCAM1,IFITM3,IFITM2
2_Member	GO Biological Processes	GO:0034097	response to cytokine	-2.34689	-0.177292	8/799	684,3428,3434,7412,7424,7474,10410,10581	BST2,IFI16,IFIT1,VCAM1,VEGFC,WNT5A,IFITM3,IFITM2
2_Member	WikiPathways	WP5115	Network map of SARS-CoV-2 signaling pathway	-2.22991	-0.125586	4/221	684,2537,3434,10410	BST2,IFI6,IFIT1,IFITM3
2_Member	GO Biological Processes	GO:0071345	cellular response to cytokine stimulus	-2.09692	-0.0367337	7/703	3428,3434,7412,7424,7474,10410,10581	IFI16,IFIT1,VCAM1,VEGFC,WNT5A,IFITM3,IFITM2
3_Summary	GO Biological Processes	GO:0042391	regulation of membrane potential	-5.89586	-2.36219	10/425	41,2537,2697,2702,2911,3760,6326,8913,9378,30819,4509,56666,5818,152519,89,10699,164312	ASIC1,IFI6,GJA1,GJA5,GRM1,KCNJ3,SCN2A,CACNA1G,NRXN1,KCNIP2,ATP8,PANX2,NECTIN1,NIPAL1,ACTN3,CORIN,LRRN4
3_Member	GO Biological Processes	GO:0042391	regulation of membrane potential	-5.89586	-2.36219	10/425	41,2537,2697,2702,2911,3760,6326,8913,9378,30819	ASIC1,IFI6,GJA1,GJA5,GRM1,KCNJ3,SCN2A,CACNA1G,NRXN1,KCNIP2
3_Member	GO Biological Processes	GO:0001508	action potential	-4.78279	-1.73892	5/97	2697,3760,6326,8913,30819	GJA1,KCNJ3,SCN2A,CACNA1G,KCNIP2
3_Member	GO Molecular Functions	GO:0015267	channel activity	-4.569	-1.60231	9/480	41,2697,2702,3760,4509,6326,8913,30819,56666	ASIC1,GJA1,GJA5,KCNJ3,ATP8,SCN2A,CACNA1G,KCNIP2,PANX2
3_Member	GO Molecular Functions	GO:0022803	passive transmembrane transporter activity	-4.56195	-1.60231	9/481	41,2697,2702,3760,4509,6326,8913,30819,56666	ASIC1,GJA1,GJA5,KCNJ3,ATP8,SCN2A,CACNA1G,KCNIP2,PANX2
3_Member	GO Molecular Functions	GO:0005272	sodium channel activity	-3.34289	-0.797697	3/46	41,6326,8913	ASIC1,SCN2A,CACNA1G
3_Member	GO Molecular Functions	GO:0005261	cation channel activity	-3.0995	-0.645008	6/335	41,3760,4509,6326,8913,30819	ASIC1,KCNJ3,ATP8,SCN2A,CACNA1G,KCNIP2
3_Member	GO Biological Processes	GO:0030001	metal ion transport	-3.0687	-0.623162	8/611	41,2702,3760,5818,6326,8913,30819,152519	ASIC1,GJA5,KCNJ3,NECTIN1,SCN2A,CACNA1G,KCNIP2,NIPAL1
3_Member	GO Biological Processes	GO:0098662	inorganic cation transmembrane transport	-2.58287	-0.327949	7/571	41,3760,4509,6326,8913,30819,152519	ASIC1,KCNJ3,ATP8,SCN2A,CACNA1G,KCNIP2,NIPAL1
3_Member	GO Molecular Functions	GO:0046873	metal ion transmembrane transporter activity	-2.56114	-0.318777	6/428	41,3760,6326,8913,30819,152519	ASIC1,KCNJ3,SCN2A,CACNA1G,KCNIP2,NIPAL1
3_Member	GO Molecular Functions	GO:0005216	ion channel activity	-2.54124	-0.308593	6/432	41,3760,4509,6326,8913,30819	ASIC1,KCNJ3,ATP8,SCN2A,CACNA1G,KCNIP2
3_Member	GO Molecular Functions	GO:0022890	inorganic cation transmembrane transporter activity	-2.48025	-0.2662	7/596	41,3760,4509,6326,8913,30819,152519	ASIC1,KCNJ3,ATP8,SCN2A,CACNA1G,KCNIP2,NIPAL1
3_Member	Reactome Gene Sets	R-HSA-397014	Muscle contraction	-2.40554	-0.216742	4/197	89,6326,10699,30819	ACTN3,SCN2A,CORIN,KCNIP2
3_Member	GO Molecular Functions	GO:0005244	voltage-gated ion channel activity	-2.37461	-0.195522	4/201	3760,6326,8913,30819	KCNJ3,SCN2A,CACNA1G,KCNIP2
3_Member	GO Molecular Functions	GO:0022832	voltage-gated channel activity	-2.37461	-0.195522	4/201	3760,6326,8913,30819	KCNJ3,SCN2A,CACNA1G,KCNIP2
3_Member	GO Biological Processes	GO:0098660	inorganic ion transmembrane transport	-2.32341	-0.161846	7/637	41,3760,4509,6326,8913,30819,152519	ASIC1,KCNJ3,ATP8,SCN2A,CACNA1G,KCNIP2,NIPAL1
3_Member	GO Biological Processes	GO:0098655	cation transmembrane transport	-2.31245	-0.15996	7/640	41,3760,4509,6326,8913,30819,152519	ASIC1,KCNJ3,ATP8,SCN2A,CACNA1G,KCNIP2,NIPAL1
3_Member	GO Biological Processes	GO:0034765	regulation of ion transmembrane transport	-2.30587	-0.159611	6/483	2697,2702,3760,6326,8913,30819	GJA1,GJA5,KCNJ3,SCN2A,CACNA1G,KCNIP2
3_Member	GO Molecular Functions	GO:0022836	gated channel activity	-2.29478	-0.156863	5/340	41,3760,6326,8913,30819	ASIC1,KCNJ3,SCN2A,CACNA1G,KCNIP2
3_Member	GO Molecular Functions	GO:0008324	cation transmembrane transporter activity	-2.27641	-0.150987	7/650	41,3760,4509,6326,8913,30819,152519	ASIC1,KCNJ3,ATP8,SCN2A,CACNA1G,KCNIP2,NIPAL1
3_Member	GO Biological Processes	GO:0035725	sodium ion transmembrane transport	-2.14088	-0.0677241	3/121	41,6326,8913	ASIC1,SCN2A,CACNA1G
3_Member	GO Biological Processes	GO:0007613	memory	-2.13107	-0.065376	3/122	41,6326,164312	ASIC1,SCN2A,LRRN4
3_Member	Reactome Gene Sets	R-HSA-5576891	Cardiac conduction	-2.06486	-0.0101067	3/129	6326,10699,30819	SCN2A,CORIN,KCNIP2
3_Member	GO Molecular Functions	GO:0015318	inorganic molecular entity transmembrane transporter activity	-2.00623	0	7/732	41,3760,4509,6326,8913,30819,152519	ASIC1,KCNJ3,ATP8,SCN2A,CACNA1G,KCNIP2,NIPAL1
4_Summary	GO Biological Processes	GO:0001568	blood vessel development	-5.24693	-1.88934	10/503	2047,2308,2697,2702,6423,7424,8817,23493,221981,100506013,7474,9315,23089,57556,222663,2911,64762,153769,9856,171019,339479,339855,252995,54566	EPHB1,FOXO1,GJA1,GJA5,SFRP2,VEGFC,FGF18,HEY2,THSD7A,APELA,WNT5A,NREP,PEG10,SEMA6A,SCUBE3,GRM1,GAREM1,SH3RF2,KIAA0319,ADAMTS19,BRINP3,KY,FNDC5,EPB41L4B
4_Member	GO Biological Processes	GO:0001568	blood vessel development	-5.24693	-1.88934	10/503	2047,2308,2697,2702,6423,7424,8817,23493,221981,100506013	EPHB1,FOXO1,GJA1,GJA5,SFRP2,VEGFC,FGF18,HEY2,THSD7A,APELA
4_Member	GO Biological Processes	GO:0001944	vasculature development	-5.0776	-1.81627	10/526	2047,2308,2697,2702,6423,7424,8817,23493,221981,100506013	EPHB1,FOXO1,GJA1,GJA5,SFRP2,VEGFC,FGF18,HEY2,THSD7A,APELA
4_Member	GO Biological Processes	GO:0090287	regulation of cellular response to growth factor stimulus	-5.05979	-1.81627	8/314	6423,7424,7474,8817,9315,23089,57556,222663	SFRP2,VEGFC,WNT5A,FGF18,NREP,PEG10,SEMA6A,SCUBE3
4_Member	GO Biological Processes	GO:0048514	blood vessel morphogenesis	-5.0347	-1.81627	9/419	2047,2697,2702,6423,7424,8817,23493,221981,100506013	EPHB1,GJA1,GJA5,SFRP2,VEGFC,FGF18,HEY2,THSD7A,APELA
4_Member	GO Biological Processes	GO:0035239	tube morphogenesis	-4.23372	-1.35326	10/661	2047,2697,2702,6423,7424,7474,8817,23493,221981,100506013	EPHB1,GJA1,GJA5,SFRP2,VEGFC,WNT5A,FGF18,HEY2,THSD7A,APELA
4_Member	GO Biological Processes	GO:0043408	regulation of MAPK cascade	-4.10029	-1.25459	10/686	2047,2308,2911,6423,7474,8817,57556,64762,153769,100506013	EPHB1,FOXO1,GRM1,SFRP2,WNT5A,FGF18,SEMA6A,GAREM1,SH3RF2,APELA
4_Member	GO Biological Processes	GO:0001525	angiogenesis	-4.06208	-1.2381	7/321	2047,2702,6423,7424,8817,221981,100506013	EPHB1,GJA5,SFRP2,VEGFC,FGF18,THSD7A,APELA
4_Member	GO Biological Processes	GO:0090092	regulation of transmembrane receptor protein serine/threonine kinase signaling pathway	-3.61922	-0.960603	6/267	6423,7474,9315,9856,23089,222663	SFRP2,WNT5A,NREP,KIAA0319,PEG10,SCUBE3
4_Member	GO Biological Processes	GO:0045766	positive regulation of angiogenesis	-3.47817	-0.87962	5/183	6423,7424,7474,8817,100506013	SFRP2,VEGFC,WNT5A,FGF18,APELA
4_Member	GO Biological Processes	GO:1904018	positive regulation of vasculature development	-3.47817	-0.87962	5/183	6423,7424,7474,8817,100506013	SFRP2,VEGFC,WNT5A,FGF18,APELA
4_Member	Canonical Pathways	M5885	NABA MATRISOME ASSOCIATED	-3.11983	-0.654576	9/751	6423,7424,7474,8817,57556,171019,222663,339479,339855	SFRP2,VEGFC,WNT5A,FGF18,SEMA6A,ADAMTS19,SCUBE3,BRINP3,KY
4_Member	Canonical Pathways	M5883	NABA SECRETED FACTORS	-3.04654	-0.621769	6/343	6423,7424,7474,8817,222663,339479	SFRP2,VEGFC,WNT5A,FGF18,SCUBE3,BRINP3
4_Member	GO Biological Processes	GO:0045765	regulation of angiogenesis	-3.03352	-0.613788	6/345	6423,7424,7474,8817,57556,100506013	SFRP2,VEGFC,WNT5A,FGF18,SEMA6A,APELA
4_Member	GO Biological Processes	GO:1901342	regulation of vasculature development	-2.99501	-0.587622	6/351	6423,7424,7474,8817,57556,100506013	SFRP2,VEGFC,WNT5A,FGF18,SEMA6A,APELA
4_Member	GO Molecular Functions	GO:0048018	receptor ligand activity	-2.96382	-0.572375	7/489	6423,7424,7474,8817,57556,252995,100506013	SFRP2,VEGFC,WNT5A,FGF18,SEMA6A,FNDC5,APELA
4_Member	GO Molecular Functions	GO:0030546	signaling receptor activator activity	-2.92829	-0.559495	7/496	6423,7424,7474,8817,57556,252995,100506013	SFRP2,VEGFC,WNT5A,FGF18,SEMA6A,FNDC5,APELA
4_Member	GO Molecular Functions	GO:0030545	signaling receptor regulator activity	-2.70032	-0.403431	7/544	6423,7424,7474,8817,57556,252995,100506013	SFRP2,VEGFC,WNT5A,FGF18,SEMA6A,FNDC5,APELA
4_Member	GO Biological Processes	GO:0030335	positive regulation of cell migration	-2.62986	-0.352045	7/560	7424,7474,8817,54566,57556,153769,100506013	VEGFC,WNT5A,FGF18,EPB41L4B,SEMA6A,SH3RF2,APELA
4_Member	GO Biological Processes	GO:0010634	positive regulation of epithelial cell migration	-2.59845	-0.33487	4/174	7424,7474,8817,54566	VEGFC,WNT5A,FGF18,EPB41L4B
4_Member	GO Biological Processes	GO:2000147	positive regulation of cell motility	-2.52881	-0.301556	7/584	7424,7474,8817,54566,57556,153769,100506013	VEGFC,WNT5A,FGF18,EPB41L4B,SEMA6A,SH3RF2,APELA
4_Member	GO Biological Processes	GO:0051272	positive regulation of cellular component movement	-2.48025	-0.2662	7/596	7424,7474,8817,54566,57556,153769,100506013	VEGFC,WNT5A,FGF18,EPB41L4B,SEMA6A,SH3RF2,APELA
4_Member	GO Biological Processes	GO:0040017	positive regulation of locomotion	-2.46831	-0.259427	7/599	7424,7474,8817,54566,57556,153769,100506013	VEGFC,WNT5A,FGF18,EPB41L4B,SEMA6A,SH3RF2,APELA
4_Member	GO Biological Processes	GO:0070372	regulation of ERK1 and ERK2 cascade	-2.45777	-0.259046	5/311	2047,8817,57556,64762,100506013	EPHB1,FGF18,SEMA6A,GAREM1,APELA
4_Member	GO Biological Processes	GO:0043410	positive regulation of MAPK cascade	-2.276	-0.150987	6/490	2911,7474,8817,64762,153769,100506013	GRM1,WNT5A,FGF18,GAREM1,SH3RF2,APELA
4_Member	GO Biological Processes	GO:0001938	positive regulation of endothelial cell proliferation	-2.24415	-0.133722	3/111	7424,7474,100506013	VEGFC,WNT5A,APELA
4_Member	GO Biological Processes	GO:0050920	regulation of chemotaxis	-2.20279	-0.105332	4/225	7424,7474,8817,57556	VEGFC,WNT5A,FGF18,SEMA6A
4_Member	GO Biological Processes	GO:0010595	positive regulation of endothelial cell migration	-2.04667	0	3/131	7424,7474,8817	VEGFC,WNT5A,FGF18
4_Member	GO Biological Processes	GO:0045667	regulation of osteoblast differentiation	-2.00253	0	3/136	6423,7424,222663	SFRP2,VEGFC,SCUBE3
5_Summary	GO Biological Processes	GO:0030029	actin filament-based process	-4.57454	-1.60231	10/602	89,2697,3760,4645,8913,30846,54566,84327,85477,221981	ACTN3,GJA1,KCNJ3,MYO5B,CACNA1G,EHD2,EPB41L4B,ZBED3,SCIN,THSD7A
5_Member	GO Biological Processes	GO:0030029	actin filament-based process	-4.57454	-1.60231	10/602	89,2697,3760,4645,8913,30846,54566,84327,85477,221981	ACTN3,GJA1,KCNJ3,MYO5B,CACNA1G,EHD2,EPB41L4B,ZBED3,SCIN,THSD7A
5_Member	GO Biological Processes	GO:0030036	actin cytoskeleton organization	-2.71834	-0.418296	7/540	89,4645,30846,54566,84327,85477,221981	ACTN3,MYO5B,EHD2,EPB41L4B,ZBED3,SCIN,THSD7A
6_Summary	GO Biological Processes	GO:0030308	negative regulation of cell growth	-4.48065	-1.53525	6/186	684,2697,6423,7474,9856,57556,2702,23493,1903,2047,2308,6658,7424,9378,26011,89,2674,252995,8817,85477,4148,127435,5818,100506013,222663,9892,320,23089	BST2,GJA1,SFRP2,WNT5A,KIAA0319,SEMA6A,GJA5,HEY2,S1PR3,EPHB1,FOXO1,SOX3,VEGFC,NRXN1,TENM4,ACTN3,GFRA1,FNDC5,FGF18,SCIN,MATN3,PODN,NECTIN1,APELA,SCUBE3,SNAP91,APBA1,PEG10
6_Member	GO Biological Processes	GO:0030308	negative regulation of cell growth	-4.48065	-1.53525	6/186	684,2697,6423,7474,9856,57556	BST2,GJA1,SFRP2,WNT5A,KIAA0319,SEMA6A
6_Member	GO Biological Processes	GO:0003283	atrial septum development	-4.25245	-1.35975	3/23	2702,7474,23493	GJA5,WNT5A,HEY2
6_Member	GO Biological Processes	GO:0045596	negative regulation of cell differentiation	-4.10551	-1.25459	10/685	1903,2047,2308,6423,6658,7424,7474,9856,23493,57556	S1PR3,EPHB1,FOXO1,SFRP2,SOX3,VEGFC,WNT5A,KIAA0319,HEY2,SEMA6A
6_Member	GO Biological Processes	GO:0051960	regulation of nervous system development	-4.02795	-1.23463	8/439	2047,7424,7474,9378,9856,23493,26011,57556	EPHB1,VEGFC,WNT5A,NRXN1,KIAA0319,HEY2,TENM4,SEMA6A
6_Member	GO Biological Processes	GO:0003151	outflow tract morphogenesis	-3.95209	-1.18742	4/76	2702,6423,7474,23493	GJA5,SFRP2,WNT5A,HEY2
6_Member	GO Biological Processes	GO:0045926	negative regulation of growth	-3.82072	-1.09153	6/245	684,2697,6423,7474,9856,57556	BST2,GJA1,SFRP2,WNT5A,KIAA0319,SEMA6A
6_Member	GO Biological Processes	GO:0060284	regulation of cell development	-3.64249	-0.969156	8/500	89,1903,7424,7474,9856,23493,26011,57556	ACTN3,S1PR3,VEGFC,WNT5A,KIAA0319,HEY2,TENM4,SEMA6A
6_Member	GO Biological Processes	GO:0003230	cardiac atrium development	-3.62455	-0.960603	3/37	2702,7474,23493	GJA5,WNT5A,HEY2
6_Member	GO Biological Processes	GO:0030517	negative regulation of axon extension	-3.4001	-0.826844	3/44	7474,9856,57556	WNT5A,KIAA0319,SEMA6A
6_Member	GO Biological Processes	GO:0003231	cardiac ventricle development	-3.11362	-0.654576	4/126	2702,6423,7474,23493	GJA5,SFRP2,WNT5A,HEY2
6_Member	GO Biological Processes	GO:0042733	embryonic digit morphogenesis	-3.04705	-0.621769	3/58	2697,6423,7474	GJA1,SFRP2,WNT5A
6_Member	GO Biological Processes	GO:0008584	male gonad development	-3.00201	-0.587622	4/135	2674,2697,6423,7474	GFRA1,GJA1,SFRP2,WNT5A
6_Member	GO Biological Processes	GO:0046546	development of primary male sexual characteristics	-2.99011	-0.586769	4/136	2674,2697,6423,7474	GFRA1,GJA1,SFRP2,WNT5A
6_Member	GO Biological Processes	GO:0050767	regulation of neurogenesis	-2.93251	-0.559495	6/361	7424,7474,9856,23493,26011,57556	VEGFC,WNT5A,KIAA0319,HEY2,TENM4,SEMA6A
6_Member	GO Biological Processes	GO:0050771	negative regulation of axonogenesis	-2.92273	-0.559495	3/64	7474,9856,57556	WNT5A,KIAA0319,SEMA6A
6_Member	GO Biological Processes	GO:0045598	regulation of fat cell differentiation	-2.92071	-0.559495	4/142	2308,6423,7474,252995	FOXO1,SFRP2,WNT5A,FNDC5
6_Member	GO Biological Processes	GO:0003007	heart morphogenesis	-2.86823	-0.5183	5/250	2697,2702,6423,7474,23493	GJA1,GJA5,SFRP2,WNT5A,HEY2
6_Member	GO Biological Processes	GO:0040008	regulation of growth	-2.85529	-0.51543	8/660	89,684,2697,6423,7474,9856,23493,57556	ACTN3,BST2,GJA1,SFRP2,WNT5A,KIAA0319,HEY2,SEMA6A
6_Member	GO Biological Processes	GO:0061035	regulation of cartilage development	-2.81029	-0.477325	3/70	7474,8817,85477	WNT5A,FGF18,SCIN
6_Member	GO Biological Processes	GO:0051216	cartilage development	-2.76053	-0.438383	4/157	4148,6423,7474,8817	MATN3,SFRP2,WNT5A,FGF18
6_Member	GO Biological Processes	GO:0003281	ventricular septum development	-2.75788	-0.438383	3/73	2702,7474,23493	GJA5,WNT5A,HEY2
6_Member	GO Biological Processes	GO:0046661	male sex differentiation	-2.74047	-0.427555	4/159	2674,2697,6423,7474	GFRA1,GJA1,SFRP2,WNT5A
6_Member	GO Biological Processes	GO:0040013	negative regulation of locomotion	-2.72903	-0.42098	6/396	684,2697,6423,7474,57556,127435	BST2,GJA1,SFRP2,WNT5A,SEMA6A,PODN
6_Member	GO Biological Processes	GO:0002088	lens development in camera-type eye	-2.67547	-0.384833	3/78	2697,5818,7474	GJA1,NECTIN1,WNT5A
6_Member	GO Biological Processes	GO:0003205	cardiac chamber development	-2.66294	-0.378465	4/167	2702,6423,7474,23493	GJA5,SFRP2,WNT5A,HEY2
6_Member	GO Biological Processes	GO:0001558	regulation of cell growth	-2.62744	-0.352045	6/415	684,2697,6423,7474,9856,57556	BST2,GJA1,SFRP2,WNT5A,KIAA0319,SEMA6A
6_Member	GO Biological Processes	GO:0048608	reproductive structure development	-2.60678	-0.337327	6/419	2674,2697,6423,7474,23493,100506013	GFRA1,GJA1,SFRP2,WNT5A,HEY2,APELA
6_Member	GO Biological Processes	GO:0035050	embryonic heart tube development	-2.59857	-0.33487	3/83	2697,7474,100506013	GJA1,WNT5A,APELA
6_Member	GO Biological Processes	GO:0061458	reproductive system development	-2.59143	-0.330758	6/422	2674,2697,6423,7474,23493,100506013	GFRA1,GJA1,SFRP2,WNT5A,HEY2,APELA
6_Member	GO Biological Processes	GO:0010721	negative regulation of cell development	-2.53682	-0.306874	4/181	1903,7474,9856,57556	S1PR3,WNT5A,KIAA0319,SEMA6A
6_Member	GO Biological Processes	GO:0030516	regulation of axon extension	-2.45877	-0.259046	3/93	7474,9856,57556	WNT5A,KIAA0319,SEMA6A
6_Member	GO Biological Processes	GO:0060349	bone morphogenesis	-2.40737	-0.216742	3/97	89,6423,8817	ACTN3,SFRP2,FGF18
6_Member	GO Biological Processes	GO:0060348	bone development	-2.39774	-0.211391	4/198	89,2697,6423,8817	ACTN3,GJA1,SFRP2,FGF18
6_Member	GO Biological Processes	GO:0048638	regulation of developmental growth	-2.35457	-0.182617	5/329	89,7474,9856,23493,57556	ACTN3,WNT5A,KIAA0319,HEY2,SEMA6A
6_Member	GO Biological Processes	GO:0061448	connective tissue development	-2.32215	-0.161846	4/208	4148,6423,7474,8817	MATN3,SFRP2,WNT5A,FGF18
6_Member	GO Biological Processes	GO:0030510	regulation of BMP signaling pathway	-2.31117	-0.15996	3/105	6423,7474,222663	SFRP2,WNT5A,SCUBE3
6_Member	GO Biological Processes	GO:0003279	cardiac septum development	-2.29971	-0.159611	3/106	2702,7474,23493	GJA5,WNT5A,HEY2
6_Member	Reactome Gene Sets	R-HSA-8856825	Cargo recognition for clathrin-mediated endocytosis	-2.29971	-0.159611	3/106	7474,9856,9892	WNT5A,KIAA0319,SNAP91
6_Member	GO Biological Processes	GO:0061387	regulation of extent of cell growth	-2.27715	-0.150987	3/108	7474,9856,57556	WNT5A,KIAA0319,SEMA6A
6_Member	GO Biological Processes	GO:0008406	gonad development	-2.25761	-0.136288	4/217	2674,2697,6423,7474	GFRA1,GJA1,SFRP2,WNT5A
6_Member	GO Biological Processes	GO:0001501	skeletal system development	-2.25499	-0.136288	6/495	89,2697,4148,6423,7474,8817	ACTN3,GJA1,MATN3,SFRP2,WNT5A,FGF18
6_Member	GO Biological Processes	GO:0048640	negative regulation of developmental growth	-2.24415	-0.133722	3/111	7474,9856,57556	WNT5A,KIAA0319,SEMA6A
6_Member	GO Biological Processes	GO:0045137	development of primary sexual characteristics	-2.22308	-0.120768	4/222	2674,2697,6423,7474	GFRA1,GJA1,SFRP2,WNT5A
6_Member	GO Biological Processes	GO:0090288	negative regulation of cellular response to growth factor stimulus	-2.20165	-0.105332	3/115	6423,7474,57556	SFRP2,WNT5A,SEMA6A
6_Member	GO Biological Processes	GO:0030278	regulation of ossification	-2.17084	-0.0812052	3/118	89,2697,7474	ACTN3,GJA1,WNT5A
6_Member	GO Biological Processes	GO:0060485	mesenchyme development	-2.16967	-0.0812052	4/230	6423,7474,23493,57556	SFRP2,WNT5A,HEY2,SEMA6A
6_Member	GO Biological Processes	GO:0030326	embryonic limb morphogenesis	-2.16076	-0.0800184	3/119	2697,6423,7474	GJA1,SFRP2,WNT5A
6_Member	GO Biological Processes	GO:0035113	embryonic appendage morphogenesis	-2.16076	-0.0800184	3/119	2697,6423,7474	GJA1,SFRP2,WNT5A
6_Member	WikiPathways	WP4787	Osteoblast differentiation and related diseases	-2.15077	-0.0719412	3/120	7474,8817,23493	WNT5A,FGF18,HEY2
6_Member	GO Biological Processes	GO:0048589	developmental growth	-2.14777	-0.0708419	5/369	320,2697,6423,7474,26011	APBA1,GJA1,SFRP2,WNT5A,TENM4
6_Member	GO Biological Processes	GO:0030010	establishment of cell polarity	-2.14088	-0.0677241	3/121	2047,2697,7474	EPHB1,GJA1,WNT5A
6_Member	GO Biological Processes	GO:0040007	growth	-2.13816	-0.0668799	5/371	320,2697,6423,7474,26011	APBA1,GJA1,SFRP2,WNT5A,TENM4
6_Member	GO Biological Processes	GO:0003206	cardiac chamber morphogenesis	-2.09273	-0.0343645	3/126	6423,7474,23493	SFRP2,WNT5A,HEY2
6_Member	GO Biological Processes	GO:0048729	tissue morphogenesis	-2.02592	0	6/554	2697,6423,7424,7474,23493,100506013	GJA1,SFRP2,VEGFC,WNT5A,HEY2,APELA
6_Member	GO Biological Processes	GO:0090101	negative regulation of transmembrane receptor protein serine/threonine kinase signaling pathway	-2.01121	0	3/135	6423,7474,23089	SFRP2,WNT5A,PEG10
6_Member	GO Biological Processes	GO:0010977	negative regulation of neuron projection development	-2.00253	0	3/136	7474,9856,57556	WNT5A,KIAA0319,SEMA6A
7_Summary	GO Molecular Functions	GO:0005509	calcium ion binding	-3.96274	-1.18873	10/713	89,4148,8029,9378,30819,30846,83698,85477,222663,440279	ACTN3,MATN3,CUBN,NRXN1,KCNIP2,EHD2,CALN1,SCIN,SCUBE3,UNC13C
7_Member	GO Molecular Functions	GO:0005509	calcium ion binding	-3.96274	-1.18873	10/713	89,4148,8029,9378,30819,30846,83698,85477,222663,440279	ACTN3,MATN3,CUBN,NRXN1,KCNIP2,EHD2,CALN1,SCIN,SCUBE3,UNC13C
8_Summary	GO Biological Processes	GO:0071363	cellular response to growth factor stimulus	-3.86271	-1.12491	8/464	2530,2674,7412,7424,7474,8817,57556,64762,2697,4148,2047,2308	FUT8,GFRA1,VCAM1,VEGFC,WNT5A,FGF18,SEMA6A,GAREM1,GJA1,MATN3,EPHB1,FOXO1
8_Member	GO Biological Processes	GO:0071363	cellular response to growth factor stimulus	-3.86271	-1.12491	8/464	2530,2674,7412,7424,7474,8817,57556,64762	FUT8,GFRA1,VCAM1,VEGFC,WNT5A,FGF18,SEMA6A,GAREM1
8_Member	GO Biological Processes	GO:0070848	response to growth factor	-3.6838	-0.995219	8/493	2530,2674,7412,7424,7474,8817,57556,64762	FUT8,GFRA1,VCAM1,VEGFC,WNT5A,FGF18,SEMA6A,GAREM1
8_Member	Hallmark Gene Sets	M5930	HALLMARK EPITHELIAL MESENCHYMAL TRANSITION	-3.30202	-0.79499	5/200	2697,4148,7412,7424,7474	GJA1,MATN3,VCAM1,VEGFC,WNT5A
8_Member	GO Biological Processes	GO:0035924	cellular response to vascular endothelial growth factor stimulus	-3.26183	-0.76955	3/49	7412,7424,57556	VCAM1,VEGFC,SEMA6A
8_Member	GO Biological Processes	GO:0007169	transmembrane receptor protein tyrosine kinase signaling pathway	-2.69093	-0.397178	6/403	2047,2308,2674,7424,8817,64762	EPHB1,FOXO1,GFRA1,VEGFC,FGF18,GAREM1
8_Member	GO Biological Processes	GO:2000177	regulation of neural precursor cell proliferation	-2.5692	-0.319951	3/85	2308,7424,7474	FOXO1,VEGFC,WNT5A
8_Member	GO Biological Processes	GO:0007167	enzyme linked receptor protein signaling pathway	-2.46039	-0.259046	7/601	2047,2308,2530,2674,7424,8817,64762	EPHB1,FOXO1,FUT8,GFRA1,VEGFC,FGF18,GAREM1
8_Member	KEGG Pathway	hsa04933	AGE-RAGE signaling pathway in diabetic complications	-2.37031	-0.193614	3/100	2308,7412,7424	FOXO1,VCAM1,VEGFC
9_Summary	GO Biological Processes	GO:0034330	cell junction organization	-3.80579	-1.08661	8/473	89,2047,2697,2702,5818,7474,9378,440279,57556,7412,7424,9315,2674,6658,23493	ACTN3,EPHB1,GJA1,GJA5,NECTIN1,WNT5A,NRXN1,UNC13C,SEMA6A,VCAM1,VEGFC,NREP,GFRA1,SOX3,HEY2
9_Member	GO Biological Processes	GO:0034330	cell junction organization	-3.80579	-1.08661	8/473	89,2047,2697,2702,5818,7474,9378,440279	ACTN3,EPHB1,GJA1,GJA5,NECTIN1,WNT5A,NRXN1,UNC13C
9_Member	GO Biological Processes	GO:0051963	regulation of synapse assembly	-3.44379	-0.858281	4/103	2047,5818,7474,9378	EPHB1,NECTIN1,WNT5A,NRXN1
9_Member	GO Biological Processes	GO:0007411	axon guidance	-3.05423	-0.621769	5/227	2047,5818,7474,9378,57556	EPHB1,NECTIN1,WNT5A,NRXN1,SEMA6A
9_Member	GO Biological Processes	GO:0097485	neuron projection guidance	-3.0457	-0.621769	5/228	2047,5818,7474,9378,57556	EPHB1,NECTIN1,WNT5A,NRXN1,SEMA6A
9_Member	GO Biological Processes	GO:0006935	chemotaxis	-2.8786	-0.521016	7/506	2047,5818,7412,7424,7474,9378,57556	EPHB1,NECTIN1,VCAM1,VEGFC,WNT5A,NRXN1,SEMA6A
9_Member	GO Biological Processes	GO:0042330	taxis	-2.85906	-0.515718	7/510	2047,5818,7412,7424,7474,9378,57556	EPHB1,NECTIN1,VCAM1,VEGFC,WNT5A,NRXN1,SEMA6A
9_Member	GO Biological Processes	GO:0061564	axon development	-2.81926	-0.482865	6/380	2047,5818,7474,9315,9378,57556	EPHB1,NECTIN1,WNT5A,NREP,NRXN1,SEMA6A
9_Member	GO Biological Processes	GO:0034329	cell junction assembly	-2.80073	-0.471176	5/259	89,2697,2702,7474,9378	ACTN3,GJA1,GJA5,WNT5A,NRXN1
9_Member	GO Biological Processes	GO:0099173	postsynapse organization	-2.51264	-0.290715	3/89	2047,7474,9378	EPHB1,WNT5A,NRXN1
9_Member	GO Biological Processes	GO:1901888	regulation of cell junction assembly	-2.37461	-0.195522	4/201	2047,5818,7474,9378	EPHB1,NECTIN1,WNT5A,NRXN1
9_Member	GO Biological Processes	GO:0050807	regulation of synapse organization	-2.32952	-0.164594	4/207	2047,5818,7474,9378	EPHB1,NECTIN1,WNT5A,NRXN1
9_Member	GO Biological Processes	GO:0031175	neuron projection development	-2.3161	-0.15996	7/639	2047,2674,5818,7474,9315,9378,57556	EPHB1,GFRA1,NECTIN1,WNT5A,NREP,NRXN1,SEMA6A
9_Member	GO Biological Processes	GO:0050803	regulation of synapse structure or activity	-2.28591	-0.150987	4/213	2047,5818,7474,9378	EPHB1,NECTIN1,WNT5A,NRXN1
9_Member	GO Biological Processes	GO:0007409	axonogenesis	-2.28416	-0.150987	5/342	2047,5818,7474,9378,57556	EPHB1,NECTIN1,WNT5A,NRXN1,SEMA6A
9_Member	GO Biological Processes	GO:0048593	camera-type eye morphogenesis	-2.13107	-0.065376	3/122	2047,5818,7474	EPHB1,NECTIN1,WNT5A
9_Member	GO Biological Processes	GO:0007423	sensory organ development	-2.03679	0	6/551	2047,2697,5818,6658,7474,23493	EPHB1,GJA1,NECTIN1,SOX3,WNT5A,HEY2
10_Summary	GO Molecular Functions	GO:0005178	integrin binding	-3.7991	-1.08661	5/156	89,1903,2674,6423,7412,5818,9378,26011,23493	ACTN3,S1PR3,GFRA1,SFRP2,VCAM1,NECTIN1,NRXN1,TENM4,HEY2
10_Member	GO Molecular Functions	GO:0005178	integrin binding	-3.7991	-1.08661	5/156	89,1903,2674,6423,7412	ACTN3,S1PR3,GFRA1,SFRP2,VCAM1
10_Member	GO Molecular Functions	GO:0050839	cell adhesion molecule binding	-3.33026	-0.796588	8/557	89,1903,2674,5818,6423,7412,9378,26011	ACTN3,S1PR3,GFRA1,NECTIN1,SFRP2,VCAM1,NRXN1,TENM4
10_Member	GO Biological Processes	GO:0007157	heterophilic cell-cell adhesion via plasma membrane cell adhesion molecules	-3.31526	-0.79499	3/47	5818,7412,26011	NECTIN1,VCAM1,TENM4
10_Member	GO Biological Processes	GO:0035051	cardiocyte differentiation	-2.20165	-0.105332	3/115	7412,23493,26011	VCAM1,HEY2,TENM4
11_Summary	GO Biological Processes	GO:0015800	acidic amino acid transport	-3.55612	-0.911744	3/39	320,2697,2911,3360,8913,9378,30819,440279,55,26011,85477,41,2047	APBA1,GJA1,GRM1,HTR4,CACNA1G,NRXN1,KCNIP2,UNC13C,ACP3,TENM4,SCIN,ASIC1,EPHB1
11_Member	GO Biological Processes	GO:0015800	acidic amino acid transport	-3.55612	-0.911744	3/39	320,2697,2911	APBA1,GJA1,GRM1
11_Member	GO Biological Processes	GO:0007268	chemical synaptic transmission	-3.50377	-0.883359	7/396	320,2911,3360,8913,9378,30819,440279	APBA1,GRM1,HTR4,CACNA1G,NRXN1,KCNIP2,UNC13C
11_Member	GO Biological Processes	GO:0098916	anterograde trans-synaptic signaling	-3.50377	-0.883359	7/396	320,2911,3360,8913,9378,30819,440279	APBA1,GRM1,HTR4,CACNA1G,NRXN1,KCNIP2,UNC13C
11_Member	GO Biological Processes	GO:0099537	trans-synaptic signaling	-3.39438	-0.826844	7/413	320,2911,3360,8913,9378,30819,440279	APBA1,GRM1,HTR4,CACNA1G,NRXN1,KCNIP2,UNC13C
11_Member	GO Biological Processes	GO:0099536	synaptic signaling	-3.2196	-0.741879	7/442	320,2911,3360,8913,9378,30819,440279	APBA1,GRM1,HTR4,CACNA1G,NRXN1,KCNIP2,UNC13C
11_Member	Reactome Gene Sets	R-HSA-6794361	Neurexins and neuroligins	-3.11445	-0.654576	3/55	320,2911,9378	APBA1,GRM1,NRXN1
11_Member	GO Biological Processes	GO:0031644	regulation of nervous system process	-2.96661	-0.572375	4/138	55,2911,9378,26011	ACP3,GRM1,NRXN1,TENM4
11_Member	GO Biological Processes	GO:0006835	dicarboxylic acid transport	-2.86516	-0.5183	3/67	320,2697,2911	APBA1,GJA1,GRM1
11_Member	GO Biological Processes	GO:0140352	export from cell	-2.58635	-0.328559	6/423	320,2697,9378,30819,85477,440279	APBA1,GJA1,NRXN1,KCNIP2,SCIN,UNC13C
11_Member	GO Biological Processes	GO:0050804	modulation of chemical synaptic transmission	-2.56114	-0.318777	6/428	41,320,2047,2911,9378,440279	ASIC1,APBA1,EPHB1,GRM1,NRXN1,UNC13C
11_Member	GO Biological Processes	GO:0099177	regulation of trans-synaptic signaling	-2.55615	-0.318777	6/429	41,320,2047,2911,9378,440279	ASIC1,APBA1,EPHB1,GRM1,NRXN1,UNC13C
11_Member	Reactome Gene Sets	R-HSA-6794362	Protein-protein interactions at synapses	-2.55479	-0.318777	3/86	320,2911,9378	APBA1,GRM1,NRXN1
11_Member	GO Biological Processes	GO:0001505	regulation of neurotransmitter levels	-2.30029	-0.159611	4/211	41,320,9378,440279	ASIC1,APBA1,NRXN1,UNC13C
11_Member	GO Biological Processes	GO:0006865	amino acid transport	-2.18101	-0.088639	3/117	320,2697,2911	APBA1,GJA1,GRM1
11_Member	GO Biological Processes	GO:0032940	secretion by cell	-2.13338	-0.065376	5/372	320,2697,9378,85477,440279	APBA1,GJA1,NRXN1,SCIN,UNC13C
12_Summary	GO Biological Processes	GO:0008015	blood circulation	-3.47754	-0.87962	7/400	2697,2702,3760,6518,7424,8913,10699,41,320,85477	GJA1,GJA5,KCNJ3,SLC2A5,VEGFC,CACNA1G,CORIN,ASIC1,APBA1,SCIN
12_Member	GO Biological Processes	GO:0008015	blood circulation	-3.47754	-0.87962	7/400	2697,2702,3760,6518,7424,8913,10699	GJA1,GJA5,KCNJ3,SLC2A5,VEGFC,CACNA1G,CORIN
12_Member	GO Biological Processes	GO:0003013	circulatory system process	-2.94852	-0.56362	7/492	2697,2702,3760,6518,7424,8913,10699	GJA1,GJA5,KCNJ3,SLC2A5,VEGFC,CACNA1G,CORIN
12_Member	GO Biological Processes	GO:0008217	regulation of blood pressure	-2.5197	-0.29512	4/183	2702,6518,7424,10699	GJA5,SLC2A5,VEGFC,CORIN
12_Member	GO Biological Processes	GO:0051046	regulation of secretion	-2.44074	-0.244518	7/606	41,320,2697,7424,8913,10699,85477	ASIC1,APBA1,GJA1,VEGFC,CACNA1G,CORIN,SCIN
12_Member	GO Biological Processes	GO:0003073	regulation of systemic arterial blood pressure	-2.43277	-0.239046	3/95	2702,6518,10699	GJA5,SLC2A5,CORIN
13_Summary	GO Biological Processes	GO:0045664	regulation of neuron differentiation	-3.38274	-0.821032	5/192	6423,6658,9315,23493,339479	SFRP2,SOX3,NREP,HEY2,BRINP3
13_Member	GO Biological Processes	GO:0045664	regulation of neuron differentiation	-3.38274	-0.821032	5/192	6423,6658,9315,23493,339479	SFRP2,SOX3,NREP,HEY2,BRINP3
14_Summary	GO Molecular Functions	GO:0004864	protein phosphatase inhibitor activity	-3.34289	-0.797697	3/46	5502,151242,153769,684,151636	PPP1R1A,PPP1R1C,SH3RF2,BST2,DTX3L
14_Member	GO Molecular Functions	GO:0004864	protein phosphatase inhibitor activity	-3.34289	-0.797697	3/46	5502,151242,153769	PPP1R1A,PPP1R1C,SH3RF2
14_Member	GO Molecular Functions	GO:0019212	phosphatase inhibitor activity	-3.26183	-0.76955	3/49	5502,151242,153769	PPP1R1A,PPP1R1C,SH3RF2
14_Member	GO Molecular Functions	GO:0019888	protein phosphatase regulator activity	-2.45877	-0.259046	3/93	5502,151242,153769	PPP1R1A,PPP1R1C,SH3RF2
14_Member	GO Molecular Functions	GO:0019208	phosphatase regulator activity	-2.24415	-0.133722	3/111	5502,151242,153769	PPP1R1A,PPP1R1C,SH3RF2
14_Member	GO Molecular Functions	GO:0004857	enzyme inhibitor activity	-2.04989	0	5/390	684,5502,151242,151636,153769	BST2,PPP1R1A,PPP1R1C,DTX3L,SH3RF2
15_Summary	Reactome Gene Sets	R-HSA-1474244	Extracellular matrix organization	-3.34237	-0.797697	6/301	4148,7373,7412,9378,84570,222663,89,54566,56666,127435,285848	MATN3,COL14A1,VCAM1,NRXN1,COL25A1,SCUBE3,ACTN3,EPB41L4B,PANX2,PODN,PNPLA1
15_Member	Reactome Gene Sets	R-HSA-1474244	Extracellular matrix organization	-3.34237	-0.797697	6/301	4148,7373,7412,9378,84570,222663	MATN3,COL14A1,VCAM1,NRXN1,COL25A1,SCUBE3
15_Member	GO Molecular Functions	GO:0005198	structural molecule activity	-2.66881	-0.381262	8/707	89,4148,7373,54566,56666,84570,127435,285848	ACTN3,MATN3,COL14A1,EPB41L4B,PANX2,COL25A1,PODN,PNPLA1
15_Member	GO Molecular Functions	GO:0005201	extracellular matrix structural constituent	-2.61657	-0.344161	4/172	4148,7373,84570,127435	MATN3,COL14A1,COL25A1,PODN
16_Summary	GO Biological Processes	GO:0032872	regulation of stress-activated MAPK cascade	-3.33186	-0.796588	5/197	2047,2308,6423,7474,153769,2530,9856,151636,57556,89,3430	EPHB1,FOXO1,SFRP2,WNT5A,SH3RF2,FUT8,KIAA0319,DTX3L,SEMA6A,ACTN3,IFI35
16_Member	GO Biological Processes	GO:0032872	regulation of stress-activated MAPK cascade	-3.33186	-0.796588	5/197	2047,2308,6423,7474,153769	EPHB1,FOXO1,SFRP2,WNT5A,SH3RF2
16_Member	GO Biological Processes	GO:0070302	regulation of stress-activated protein kinase signaling cascade	-3.30202	-0.79499	5/200	2047,2308,6423,7474,153769	EPHB1,FOXO1,SFRP2,WNT5A,SH3RF2
16_Member	GO Biological Processes	GO:0032873	negative regulation of stress-activated MAPK cascade	-3.23598	-0.753457	3/50	2308,6423,153769	FOXO1,SFRP2,SH3RF2
16_Member	GO Biological Processes	GO:0070303	negative regulation of stress-activated protein kinase signaling cascade	-3.23598	-0.753457	3/50	2308,6423,153769	FOXO1,SFRP2,SH3RF2
16_Member	GO Biological Processes	GO:0046328	regulation of JNK cascade	-2.94348	-0.56362	4/140	2047,6423,7474,153769	EPHB1,SFRP2,WNT5A,SH3RF2
16_Member	GO Biological Processes	GO:0080135	regulation of cellular response to stress	-2.72654	-0.42098	8/692	2047,2308,2530,6423,7474,9856,151636,153769	EPHB1,FOXO1,FUT8,SFRP2,WNT5A,KIAA0319,DTX3L,SH3RF2
16_Member	GO Biological Processes	GO:0043409	negative regulation of MAPK cascade	-2.55415	-0.318777	4/179	2308,6423,57556,153769	FOXO1,SFRP2,SEMA6A,SH3RF2
16_Member	GO Biological Processes	GO:1902532	negative regulation of intracellular signal transduction	-2.06617	-0.0101067	6/543	89,2308,3430,6423,57556,153769	ACTN3,FOXO1,IFI35,SFRP2,SEMA6A,SH3RF2
17_Summary	GO Biological Processes	GO:0071214	cellular response to abiotic stimulus	-3.29726	-0.79499	6/307	41,2697,2911,3428,6326,6423,684,2537,3434,5502,151242,151636,153769,2308,7412	ASIC1,GJA1,GRM1,IFI16,SCN2A,SFRP2,BST2,IFI6,IFIT1,PPP1R1A,PPP1R1C,DTX3L,SH3RF2,FOXO1,VCAM1
17_Member	GO Biological Processes	GO:0071214	cellular response to abiotic stimulus	-3.29726	-0.79499	6/307	41,2697,2911,3428,6326,6423	ASIC1,GJA1,GRM1,IFI16,SCN2A,SFRP2
17_Member	GO Biological Processes	GO:0104004	cellular response to environmental stimulus	-3.29726	-0.79499	6/307	41,2697,2911,3428,6326,6423	ASIC1,GJA1,GRM1,IFI16,SCN2A,SFRP2
17_Member	GO Biological Processes	GO:0043086	negative regulation of catalytic activity	-2.98113	-0.581795	9/786	684,2537,3428,3434,5502,6423,151242,151636,153769	BST2,IFI6,IFI16,IFIT1,PPP1R1A,SFRP2,PPP1R1C,DTX3L,SH3RF2
17_Member	GO Biological Processes	GO:2000117	negative regulation of cysteine-type endopeptidase activity	-2.5692	-0.319951	3/85	2537,3428,6423	IFI6,IFI16,SFRP2
17_Member	GO Biological Processes	GO:0031668	cellular response to extracellular stimulus	-2.12468	-0.060823	4/237	2308,3428,6423,7412	FOXO1,IFI16,SFRP2,VCAM1
17_Member	GO Biological Processes	GO:0010951	negative regulation of endopeptidase activity	-2.0392	0	4/251	684,2537,3428,6423	BST2,IFI6,IFI16,SFRP2
18_Summary	GO Biological Processes	GO:0032652	regulation of interleukin-1 production	-3.07547	-0.625473	4/129	1903,3428,7474,56666,3430,3434,55061,151636,23493	S1PR3,IFI16,WNT5A,PANX2,IFI35,IFIT1,SUSD4,DTX3L,HEY2
18_Member	GO Biological Processes	GO:0032652	regulation of interleukin-1 production	-3.07547	-0.625473	4/129	1903,3428,7474,56666	S1PR3,IFI16,WNT5A,PANX2
18_Member	GO Biological Processes	GO:0002831	regulation of response to biotic stimulus	-2.99501	-0.587622	6/351	3428,3430,3434,7474,55061,151636	IFI16,IFI35,IFIT1,WNT5A,SUSD4,DTX3L
18_Member	GO Biological Processes	GO:0032732	positive regulation of interleukin-1 production	-2.75788	-0.438383	3/73	3428,7474,56666	IFI16,WNT5A,PANX2
18_Member	GO Biological Processes	GO:0032651	regulation of interleukin-1 beta production	-2.25504	-0.136288	3/110	1903,3428,7474	S1PR3,IFI16,WNT5A
18_Member	GO Biological Processes	GO:0045088	regulation of innate immune response	-2.16314	-0.0800184	4/231	3428,3430,7474,55061	IFI16,IFI35,WNT5A,SUSD4
18_Member	GO Biological Processes	GO:0051098	regulation of binding	-2.16232	-0.0800184	5/366	3428,3434,7474,23493,151636	IFI16,IFIT1,WNT5A,HEY2,DTX3L
19_Summary	KEGG Pathway	hsa04020	Calcium signaling pathway	-2.94658	-0.56362	5/240	2911,3360,7424,8817,8913,1903	GRM1,HTR4,VEGFC,FGF18,CACNA1G,S1PR3
19_Member	KEGG Pathway	hsa04020	Calcium signaling pathway	-2.94658	-0.56362	5/240	2911,3360,7424,8817,8913	GRM1,HTR4,VEGFC,FGF18,CACNA1G
19_Member	GO Biological Processes	GO:0007193	adenylate cyclase-inhibiting G protein-coupled receptor signaling pathway	-2.74092	-0.427555	3/74	1903,2911,3360	S1PR3,GRM1,HTR4
20_Summary	GO Biological Processes	GO:0045995	regulation of embryonic development	-2.92273	-0.559495	3/64	6423,26011,84327	SFRP2,TENM4,ZBED3
20_Member	GO Biological Processes	GO:0045995	regulation of embryonic development	-2.92273	-0.559495	3/64	6423,26011,84327	SFRP2,TENM4,ZBED3

## Sheet: Sheet2
GroupID	Category	Term	Description	LogP	Log(q-value)	InTerm_InList	Genes	Symbols
1_Member	GO Biological Processes	GO:0008016	regulation of heart contraction	-7.58532	-3.44959	9/207	2697,2702,3760,8913,10699,23493,27129,30819,100506013	GJA1,GJA5,KCNJ3,CACNA1G,CORIN,HEY2,HSPB7,KCNIP2,APELA
2_Summary	Reactome Gene Sets	R-HSA-909733	Interferon alpha/beta signaling	-6.95612	-2.99647	6/70	684,2537,3430,3434,10410,10581,7412,55008,129607,3428,151636,7474,55061,2308,7424	BST2,IFI6,IFI35,IFIT1,IFITM3,IFITM2,VCAM1,HERC6,CMPK2,IFI16,DTX3L,WNT5A,SUSD4,FOXO1,VEGFC
1_Member	GO Biological Processes	GO:0060371	regulation of atrial cardiac muscle cell membrane depolarization	-5.40818	-1.9987	3/10	2697,2702,8913	GJA1,GJA5,CACNA1G
1_Member	GO Biological Processes	GO:0003161	cardiac conduction system development	-5.19842	-1.8756	4/37	2697,2702,8913,23493	GJA1,GJA5,CACNA1G,HEY2
3_Member	GO Biological Processes	GO:0001508	action potential	-4.78279	-1.73892	5/97	2697,3760,6326,8913,30819	GJA1,KCNJ3,SCN2A,CACNA1G,KCNIP2
7_Summary	GO Molecular Functions	GO:0005509	calcium ion binding	-3.96274	-1.18873	10/713	89,4148,8029,9378,30819,30846,83698,85477,222663,440279	ACTN3,MATN3,CUBN,NRXN1,KCNIP2,EHD2,CALN1,SCIN,SCUBE3,UNC13C
9_Summary	GO Biological Processes	GO:0034330	cell junction organization	-3.80579	-1.08661	8/473	89,2047,2697,2702,5818,7474,9378,440279,57556,7412,7424,9315,2674,6658,23493	ACTN3,EPHB1,GJA1,GJA5,NECTIN1,WNT5A,NRXN1,UNC13C,SEMA6A,VCAM1,VEGFC,NREP,GFRA1,SOX3,HEY2
6_Member	GO Biological Processes	GO:0003230	cardiac atrium development	-3.62455	-0.960603	3/37	2702,7474,23493	GJA5,WNT5A,HEY2
