# Supplementary material for: HSBP7 Rescue of a Titin Cardiomyopathy Identified by Morphological Profiling
Source: Research Square preprint supplement (doi:10.21203/rs.3.rs-4558927/v1), 2024-07-08
Supplement: Supplementary file 2 [file 792b7dfffd9235332aa8b4a6.xlsx]

## Sheet: Annotation
MyList	Gene ID	Type	Tax ID	Homologene Gene ID	Homologene Gene Tax ID	M5891 HALLMARK HYPOXIA	M5930 HALLMARK EPITHELIAL MESENCHYMA	M5909 HALLMARK MYOGENESIS	GO:0050839 cell adhesion molecule binding	GO:0030029 actin filament-based process	GO:2000147 positive regulation of cell mo	GO:0048729 tissue morphogenesis	R-HSA-397014 Muscle contraction	M5890 HALLMARK TNFA SIGNALING VIA NF	GO:0045765 regulation of angiogenesis	M255 PID HIF1 TFPATHWAY	GO:0035239 tube morphogenesis	M5947 HALLMARK IL2 STAT5 SIGNALING	GO:0032989 cellular component morphogenes	GO:0051373 FATZ binding	GO:0005178 integrin binding	GO:0001666 response to hypoxia	WP3888 VEGFA-VEGFR2 signaling pathway	GO:0042803 protein homodimerization activ	GO:1901379 regulation of potassium ion tr
NPPB	4879	symbol	H. sapiens	4879	H. sapiens	1	0	1	0	0	0	0	1	0	1	0	0	0	0	0	0	0	0	0	0
XIRP2	129446	symbol	H. sapiens	129446	H. sapiens	0	0	1	0	1	0	1	1	0	0	0	0	0	0	0	0	0	0	0	0
ACTA1	58	symbol	H. sapiens	58	H. sapiens	0	0	1	0	1	0	1	1	0	1	0	0	0	1	0	0	0	0	0	0
SULT1E1	6783	symbol	H. sapiens	6783	H. sapiens	1	0	0	0	0	0	0	0	0	0	0	0	0	0	0	0	0	0	0	0
SOX9	6662	symbol	H. sapiens	6662	H. sapiens	1	0	1	0	0	1	1	1	0	1	0	1	0	0	0	0	0	0	0	0
NPPA	4878	symbol	H. sapiens	4878	H. sapiens	1	0	1	0	0	0	0	1	0	0	0	0	0	0	0	0	0	0	0	1
PDLIM3	27295	symbol	H. sapiens	27295	H. sapiens	0	0	1	0	1	0	0	0	0	0	0	0	0	0	0	0	0	0	0	0
CHAC1	79094	symbol	H. sapiens	79094	H. sapiens	1	0	0	0	0	0	0	0	0	0	0	0	0	0	0	0	0	1	0	0
C5AR1	728	symbol	H. sapiens	728	H. sapiens	0	0	0	0	0	1	0	0	0	1	0	0	0	1	0	0	0	0	0	0
ANO4	121601	symbol	H. sapiens	121601	H. sapiens	0	0	0	0	0	0	0	0	0	0	0	0	0	0	0	0	0	0	0	1
DNAAF3	352909	symbol	H. sapiens	352909	H. sapiens	0	0	0	0	0	0	0	0	0	0	0	0	0	0	0	0	0	0	0	0
PGR	5241	symbol	H. sapiens	5241	H. sapiens	0	0	0	0	0	0	1	0	0	0	0	1	0	0	0	0	0	0	0	0
DUSP6	1848	symbol	H. sapiens	1848	H. sapiens	0	0	0	0	0	0	0	0	0	0	0	0	0	0	0	0	0	0	0	0
ADGRL4	64123	symbol	H. sapiens	64123	H. sapiens	0	0	0	0	0	0	0	0	0	0	0	0	0	0	0	0	0	0	0	0
CASQ1	844	symbol	H. sapiens	844	H. sapiens	0	0	1	0	1	0	0	1	0	0	0	0	0	1	0	0	0	0	0	1
TNNI3	7137	symbol	H. sapiens	7137	H. sapiens	0	0	1	0	1	0	1	1	0	0	0	1	0	0	0	1	0	0	0	1
PLAU	5328	symbol	H. sapiens	5328	H. sapiens	0	0	0	0	0	1	0	0	1	1	0	0	0	1	0	1	1	1	0	0
STC1	6781	symbol	H. sapiens	6781	H. sapiens	1	0	0	0	0	0	1	1	0	1	0	1	0	1	0	0	1	0	0	1
SGCG	6445	symbol	H. sapiens	6445	H. sapiens	0	1	1	0	0	0	0	1	0	0	0	0	0	0	0	1	0	0	0	0
CNTN1	1272	symbol	H. sapiens	1272	H. sapiens	0	0	1	1	0	0	0	0	0	0	0	0	0	1	0	1	0	0	0	1
ATP1A2	477	symbol	H. sapiens	477	H. sapiens	1	0	0	0	0	0	0	1	0	0	0	0	0	0	0	1	0	0	1	1
ASPN	54829	symbol	H. sapiens	54829	H. sapiens	0	0	0	0	0	0	0	0	0	0	0	0	0	0	0	1	0	0	0	0
KRT80	144501	symbol	H. sapiens	144501	H. sapiens	0	0	0	0	0	0	0	0	0	0	0	0	0	0	0	0	0	0	0	0
CXCL12	6387	symbol	H. sapiens	6387	H. sapiens	0	1	0	1	0	1	0	1	0	1	1	0	0	1	0	1	1	0	0	1
PNCK	139728	symbol	H. sapiens	139728	H. sapiens	0	0	0	0	0	0	0	0	0	0	0	0	0	0	0	0	0	0	0	0
COL9A1	1297	symbol	H. sapiens	1297	H. sapiens	0	0	0	0	0	0	0	0	0	0	0	0	0	1	0	1	0	0	0	0
AREG	374	symbol	H. sapiens	374	H. sapiens	0	1	0	0	0	0	1	0	1	1	0	1	0	1	0	0	0	0	0	0
VTRNA1-3	56662	symbol	H. sapiens	56662	H. sapiens	0	0	0	0	0	0	0	0	0	0	0	0	0	0	0	0	0	0	0	0
C5orf46	389336	symbol	H. sapiens	389336	H. sapiens	0	0	0	0	0	0	0	0	0	0	0	0	0	0	0	0	0	0	0	0
ANKRD34C	390616	symbol	H. sapiens	390616	H. sapiens	0	0	0	0	0	0	0	0	0	0	0	0	0	0	0	0	0	0	0	0
GIMAP8	155038	symbol	H. sapiens	155038	H. sapiens	0	0	0	0	0	0	0	0	0	0	0	0	0	0	0	0	0	0	0	0
KRT7	3855	symbol	H. sapiens	3855	H. sapiens	0	0	0	0	0	0	0	0	0	0	0	0	0	0	0	0	0	0	0	0
LDHA	3939	symbol	H. sapiens	3939	H. sapiens	1	0	0	1	0	0	0	0	0	0	1	0	0	0	0	0	0	1	0	0
FSTL3	10272	symbol	H. sapiens	10272	H. sapiens	0	1	0	0	0	1	0	0	0	0	0	0	0	0	0	0	0	0	0	0
NMB	4828	symbol	H. sapiens	4828	H. sapiens	0	0	0	0	0	0	0	0	0	0	0	0	0	0	0	0	0	0	0	0
SLC6A6	6533	symbol	H. sapiens	6533	H. sapiens	1	0	0	0	0	0	0	1	0	0	0	0	0	0	0	0	0	0	0	1
HOPX	84525	symbol	H. sapiens	84525	H. sapiens	0	0	1	0	0	0	0	1	0	0	0	0	1	0	0	0	0	0	0	0
LINC01778	105378622	symbol	H. sapiens	105378622	H. sapiens	0	0	0	0	0	0	0	0	0	0	0	0	0	0	0	0	0	0	0	0
TMCC3	57458	symbol	H. sapiens	57458	H. sapiens	0	0	0	0	0	0	0	0	0	0	0	0	0	0	0	0	0	0	0	0
ST8SIA2	8128	symbol	H. sapiens	8128	H. sapiens	1	0	0	0	0	0	0	0	0	0	0	0	0	1	0	0	0	0	0	0
NANOS1	340719	symbol	H. sapiens	340719	H. sapiens	0	0	0	0	0	0	0	0	0	0	0	0	0	0	0	0	0	0	0	0
ATP1B4	23439	symbol	H. sapiens	23439	H. sapiens	0	0	0	0	0	0	0	1	0	0	0	0	0	0	0	0	0	0	0	1
B3GNT2	10678	symbol	H. sapiens	10678	H. sapiens	1	0	0	0	0	0	0	0	0	0	0	0	0	1	0	0	0	0	0	0
MYOZ1	58529	symbol	H. sapiens	58529	H. sapiens	0	0	1	0	1	0	0	1	0	0	0	0	0	1	1	0	0	0	0	0
ENO1	2023	symbol	H. sapiens	2023	H. sapiens	1	0	0	1	0	0	0	1	0	0	1	0	0	0	0	0	0	0	1	0
CX3CL1	6376	symbol	H. sapiens	6376	H. sapiens	0	0	0	1	0	1	0	0	0	0	0	1	0	1	0	1	0	0	0	1
NMRK2	27231	symbol	H. sapiens	27231	H. sapiens	1	0	0	0	0	0	0	0	0	0	0	0	0	0	0	1	0	0	0	0
DSEL	92126	symbol	H. sapiens	92126	H. sapiens	1	0	0	0	0	0	0	0	0	0	0	0	0	0	0	0	0	0	0	0
RORA	6095	symbol	H. sapiens	6095	H. sapiens	1	0	1	0	0	0	0	0	0	0	1	1	1	0	0	0	1	0	0	0
MYL2	4633	symbol	H. sapiens	4633	H. sapiens	0	0	1	0	1	0	1	1	0	0	0	0	0	1	0	1	0	1	0	0
CSPG4	1464	symbol	H. sapiens	1464	H. sapiens	1	0	0	0	0	0	0	0	0	0	0	1	0	0	0	1	0	0	0	0
C11orf96	387763	symbol	H. sapiens	387763	H. sapiens	0	0	0	0	0	0	0	0	0	0	0	0	0	0	0	0	0	0	0	0
TNMD	64102	symbol	H. sapiens	64102	H. sapiens	0	0	0	0	0	0	0	0	0	1	0	0	0	0	0	0	0	0	0	0
KCNC4	3749	symbol	H. sapiens	3749	H. sapiens	0	0	0	0	0	0	0	0	0	0	0	0	0	0	0	0	0	0	0	1
UNC5B-AS1	728978	symbol	H. sapiens	728978	H. sapiens	0	0	0	0	0	0	0	0	0	0	0	0	0	0	0	0	0	0	0	0
NES	10763	symbol	H. sapiens	10763	H. sapiens	0	0	0	0	0	0	0	0	0	0	0	1	0	1	0	0	0	0	0	0
SCN4B	6330	symbol	H. sapiens	6330	H. sapiens	0	0	0	0	1	0	0	1	0	0	0	0	0	1	0	1	0	0	0	1
PLCE1	51196	symbol	H. sapiens	51196	H. sapiens	0	0	1	0	0	0	0	1	0	1	0	0	0	1	0	1	0	0	0	0
PLAAT1	57110	symbol	H. sapiens	57110	H. sapiens	0	0	0	0	0	0	1	0	0	0	0	0	0	0	0	0	0	0	0	0
SLITRK4	139065	symbol	H. sapiens	139065	H. sapiens	0	0	0	0	0	0	0	0	0	0	0	0	0	1	0	0	0	0	0	0
ESRP1	54845	symbol	H. sapiens	54845	H. sapiens	0	0	0	0	0	0	0	0	0	0	0	0	0	0	0	0	0	0	0	0
CD200	4345	symbol	H. sapiens	4345	H. sapiens	0	0	0	1	0	0	0	0	0	0	0	0	0	0	0	1	0	0	0	0
BNIP3	664	symbol	H. sapiens	664	H. sapiens	0	0	0	0	0	0	0	0	0	0	1	0	0	0	0	0	1	0	1	1
CNTN4	152330	symbol	H. sapiens	152330	H. sapiens	0	0	0	1	0	0	0	0	0	0	0	0	0	1	0	0	0	0	0	0
TMEM71	137835	symbol	H. sapiens	137835	H. sapiens	0	0	0	0	0	0	0	0	0	0	0	0	0	0	0	0	0	0	0	0
FJX1	24147	symbol	H. sapiens	24147	H. sapiens	0	0	0	0	0	0	0	0	1	0	0	0	0	0	0	0	0	1	0	0
AMIGO2	347902	symbol	H. sapiens	347902	H. sapiens	0	0	0	0	0	0	0	0	0	0	0	0	0	0	0	0	0	0	0	0
CDH8	1006	symbol	H. sapiens	1006	H. sapiens	0	0	0	1	0	0	0	0	0	1	0	0	0	1	0	1	0	0	0	0
AQP10	89872	symbol	H. sapiens	89872	H. sapiens	0	0	0	0	0	0	0	0	0	0	0	0	0	0	0	0	0	0	0	1
S100A10	6281	symbol	H. sapiens	6281	H. sapiens	0	0	0	0	0	1	0	0	0	0	0	0	0	0	0	0	0	0	1	1
PXDNL	137902	symbol	H. sapiens	137902	H. sapiens	0	0	0	0	0	0	0	0	0	0	0	0	0	0	0	0	0	0	0	0
HK2	3099	symbol	H. sapiens	3099	H. sapiens	1	0	0	0	0	0	1	0	0	1	1	0	1	0	0	0	1	0	0	1
PRRX1	5396	symbol	H. sapiens	5396	H. sapiens	0	1	0	0	0	0	0	0	0	0	0	1	0	1	0	0	0	0	0	0
ZBTB42	100128927	symbol	H. sapiens	100128927	H. sapiens	0	0	1	0	0	0	0	0	0	0	0	0	0	0	0	0	0	0	0	0
BHLHE41	79365	symbol	H. sapiens	79365	H. sapiens	1	0	0	0	0	0	0	0	0	0	1	0	0	0	0	0	0	0	1	0
PTPRH	5794	symbol	H. sapiens	5794	H. sapiens	0	0	0	1	0	0	0	0	0	0	0	0	0	0	0	0	0	0	0	0
MASP1	5648	symbol	H. sapiens	5648	H. sapiens	0	0	0	0	0	0	0	0	0	0	0	0	0	0	0	0	0	0	1	0
COLQ	8292	symbol	H. sapiens	8292	H. sapiens	0	0	0	0	0	0	0	0	0	0	0	0	0	0	0	0	0	0	0	0
AHNAK2	113146	symbol	H. sapiens	113146	H. sapiens	0	0	0	0	0	0	0	0	0	0	0	0	0	0	0	0	0	0	0	0
KCNE1	3753	symbol	H. sapiens	3753	H. sapiens	0	0	0	0	1	0	0	1	0	0	0	0	0	0	1	0	0	0	0	1
SPAG4	6676	symbol	H. sapiens	6676	H. sapiens	1	0	0	0	0	0	0	0	0	0	0	0	0	0	0	0	0	0	0	0
SPON1	10418	symbol	H. sapiens	10418	H. sapiens	0	0	0	0	0	0	0	0	0	0	0	0	0	0	0	0	0	0	0	0
MYOZ3	91977	symbol	H. sapiens	91977	H. sapiens	0	0	0	0	1	0	0	0	0	0	0	0	0	0	1	0	0	0	0	0
TUBA4A	7277	symbol	H. sapiens	7277	H. sapiens	1	0	0	0	0	0	0	0	0	0	0	0	0	1	0	1	0	0	0	0
METTL11B	149281	gene_synonym	H. sapiens	149281	H. sapiens	0	0	0	0	0	0	0	0	0	0	0	0	0	0	0	0	0	0	0	0
HDAC2-AS2	101927768	symbol	H. sapiens	101927768	H. sapiens	0	0	0	0	0	0	0	0	0	0	0	0	0	0	0	0	0	0	0	0
TMSB4X	7114	symbol	H. sapiens	7114	H. sapiens	0	0	0	0	1	1	0	0	0	1	0	0	0	0	0	1	0	1	0	1
PTPRR	5801	symbol	H. sapiens	5801	H. sapiens	0	0	0	0	0	0	0	0	0	1	0	0	0	0	0	0	0	0	0	0
EYA4	2070	symbol	H. sapiens	2070	H. sapiens	0	0	0	0	0	0	0	0	0	0	0	0	0	0	0	0	0	0	0	0
TPI1	7167	symbol	H. sapiens	7167	H. sapiens	1	0	0	0	0	0	0	0	0	0	0	0	0	0	0	0	0	0	1	0
KCNE1B	102723475	gene_synonym	H. sapiens	102723475	H. sapiens	0	0	0	0	1	0	0	1	0	0	0	0	0	0	0	0	0	0	0	1
CAV3	859	symbol	H. sapiens	859	H. sapiens	0	0	1	0	1	0	0	1	0	0	0	0	0	0	0	1	1	0	0	1
EHBP1L1	254102	symbol	H. sapiens	254102	H. sapiens	0	0	0	0	1	0	0	0	0	0	0	0	0	0	0	0	0	0	0	0
KRT8	3856	symbol	H. sapiens	3856	H. sapiens	0	0	0	0	0	0	0	0	0	0	0	0	0	0	0	0	0	0	0	0
TNFRSF21	27242	symbol	H. sapiens	27242	H. sapiens	0	0	0	0	0	1	0	1	0	0	0	0	1	1	0	0	0	0	0	0
OCLN	100506658	symbol	H. sapiens	100506658	H. sapiens	0	0	0	0	0	0	0	1	0	0	0	0	0	1	0	0	0	1	0	1
KCNJ8	3764	symbol	H. sapiens	3764	H. sapiens	0	0	1	0	1	0	0	1	0	0	0	0	0	0	0	0	0	0	0	1
KCNK3	3777	symbol	H. sapiens	3777	H. sapiens	0	0	0	0	0	0	0	1	0	0	1	0	0	0	0	0	1	0	0	1
RGS4	5999	symbol	H. sapiens	5999	H. sapiens	0	1	0	0	0	0	0	1	0	0	0	0	0	0	0	0	0	0	0	1
CFAP251	144406	symbol	H. sapiens	144406	H. sapiens	0	0	0	0	0	0	0	0	0	0	0	0	0	0	0	0	0	0	0	0
APLN	8862	symbol	H. sapiens	8862	H. sapiens	0	0	1	0	0	0	1	1	0	0	0	1	0	0	0	0	0	0	0	0
MYRF	745	symbol	H. sapiens	745	H. sapiens	0	0	0	0	0	0	0	1	0	0	0	0	0	0	0	0	0	0	0	0
HRAT17	101928036	symbol	H. sapiens	101928036	H. sapiens	0	0	0	0	0	0	0	0	0	0	0	0	0	0	0	0	0	0	0	0
NEXN-AS1	374987	symbol	H. sapiens	374987	H. sapiens	0	0	0	0	0	0	0	0	0	0	0	0	0	0	0	0	0	0	0	0
BHLHE40	8553	symbol	H. sapiens	8553	H. sapiens	1	0	1	0	0	0	0	0	1	0	1	0	1	0	0	0	0	0	1	0
ITGB3	3690	symbol	H. sapiens	3690	H. sapiens	0	1	0	1	0	1	1	0	0	1	0	1	0	1	0	1	0	1	0	1
ETV5	2119	symbol	H. sapiens	2119	H. sapiens	0	0	0	0	0	0	0	0	0	0	0	0	0	0	0	0	0	0	0	0
IRF6	3664	symbol	H. sapiens	3664	H. sapiens	0	0	0	0	0	0	1	0	0	0	0	1	1	0	0	0	0	0	0	0
SYNDIG1	79953	symbol	H. sapiens	79953	H. sapiens	0	0	0	0	0	0	0	0	0	0	0	0	0	0	0	0	0	0	1	0
RAI14	26064	symbol	H. sapiens	26064	H. sapiens	0	0	0	0	1	0	0	0	0	0	0	0	0	0	0	0	0	0	0	0
RHOB	388	symbol	H. sapiens	388	H. sapiens	0	1	0	0	1	1	1	0	1	1	0	1	1	1	0	0	0	0	0	0
NIBAN1	116496	symbol	H. sapiens	116496	H. sapiens	1	0	0	0	0	0	0	0	0	0	0	0	0	0	0	0	0	0	0	0
HPR	3250	symbol	H. sapiens	3250	H. sapiens	0	0	0	0	0	0	0	0	0	0	0	0	0	0	0	0	0	0	0	0
RELB	5971	symbol	H. sapiens	5971	H. sapiens	0	0	0	0	0	0	0	0	1	0	0	0	0	0	0	0	0	0	0	0
CLP1	10978	symbol	H. sapiens	10978	H. sapiens	0	0	0	0	0	0	0	0	0	0	0	0	0	0	0	0	0	0	0	0
GBE1	2632	symbol	H. sapiens	2632	H. sapiens	1	0	0	0	0	0	0	0	0	0	0	0	0	0	0	0	0	0	0	0
IER5	51278	symbol	H. sapiens	51278	H. sapiens	0	0	0	0	0	0	0	0	1	0	0	0	0	0	0	0	0	1	0	0
SNORD116-18	100033430	symbol	H. sapiens	100033430	H. sapiens	0	0	0	0	0	0	0	0	0	0	0	0	0	0	0	0	0	0	0	0
CYP2J2	1573	symbol	H. sapiens	1573	H. sapiens	0	0	0	0	0	0	0	1	0	0	0	0	0	0	0	0	0	0	0	0
ANXA3	306	symbol	H. sapiens	306	H. sapiens	0	0	0	0	0	1	0	0	0	1	0	0	0	0	0	0	0	0	0	0
CLDN6	9074	symbol	H. sapiens	9074	H. sapiens	0	0	0	0	0	0	0	0	0	0	0	0	0	0	0	1	0	0	0	0
PDLIM4	8572	symbol	H. sapiens	8572	H. sapiens	0	1	1	0	1	0	0	0	0	0	0	0	0	0	0	0	0	0	1	0
ARRDC4	91947	symbol	H. sapiens	91947	H. sapiens	0	0	0	0	0	0	0	0	0	0	0	0	0	0	0	0	0	0	0	0
CRB2	286204	symbol	H. sapiens	286204	H. sapiens	0	0	0	0	0	0	1	0	0	0	0	0	0	0	0	1	0	0	0	0
MED12L	116931	symbol	H. sapiens	116931	H. sapiens	0	0	0	0	0	0	0	0	0	0	0	0	0	0	0	0	0	0	0	0
SEMA5B	54437	symbol	H. sapiens	54437	H. sapiens	0	0	0	0	0	1	0	0	0	0	0	0	0	1	0	0	0	0	0	0
USH1C	10083	symbol	H. sapiens	10083	H. sapiens	0	0	0	0	1	0	1	1	0	0	0	0	0	1	0	0	0	0	0	0
SERINC2	347735	symbol	H. sapiens	347735	H. sapiens	0	0	0	0	0	0	0	0	0	0	0	0	0	0	0	0	0	0	0	0
FAM162A	26355	symbol	H. sapiens	26355	H. sapiens	1	0	0	0	0	0	0	0	0	0	0	0	0	0	0	0	1	0	0	0
UNC13D	201294	symbol	H. sapiens	201294	H. sapiens	0	0	0	0	0	1	0	0	0	0	0	1	0	0	0	0	0	0	0	0
DPYSL3	1809	symbol	H. sapiens	1809	H. sapiens	0	1	0	0	1	0	0	0	0	0	0	0	0	1	0	0	0	0	0	0
TPD52L1	7164	symbol	H. sapiens	7164	H. sapiens	0	0	1	0	0	0	0	0	0	0	0	0	0	0	0	0	0	0	1	0
ACOT9	23597	symbol	H. sapiens	23597	H. sapiens	1	0	0	0	0	0	0	0	0	0	0	0	0	0	0	0	0	1	0	0
VSIR	64115	symbol	H. sapiens	64115	H. sapiens	0	0	0	0	0	1	0	0	0	0	0	0	0	0	0	0	0	0	0	0
ANKRD33B	651746	symbol	H. sapiens	651746	H. sapiens	0	0	0	0	0	0	0	0	0	0	0	0	0	0	0	0	0	0	0	0
SLC16A3	9123	symbol	H. sapiens	9123	H. sapiens	1	0	0	0	0	0	0	0	0	0	0	0	0	0	0	1	0	0	0	0
CAVIN4	347273	symbol	H. sapiens	347273	H. sapiens	0	0	1	0	0	0	0	0	0	0	0	0	0	0	0	0	0	0	0	0
RND3	390	symbol	H. sapiens	390	H. sapiens	0	0	0	0	1	0	0	0	0	0	0	0	0	0	0	0	0	0	0	0
P4HA1	5033	symbol	H. sapiens	5033	H. sapiens	1	0	0	0	1	0	0	0	0	0	0	0	1	0	0	0	0	0	0	0
STK17A	9263	symbol	H. sapiens	9263	H. sapiens	0	0	0	0	0	0	0	0	0	0	0	0	0	0	0	0	0	0	0	0
ARSJ	79642	symbol	H. sapiens	79642	H. sapiens	0	0	0	0	0	0	0	0	0	0	0	0	0	0	0	0	0	0	0	0
VASN	114990	symbol	H. sapiens	114990	H. sapiens	0	0	0	1	0	0	0	0	0	0	0	0	0	0	0	0	1	0	0	0
UCK2	7371	symbol	H. sapiens	7371	H. sapiens	1	0	0	0	0	0	0	0	0	0	0	0	1	0	0	0	0	0	0	0
PGAM1	5223	symbol	H. sapiens	5223	H. sapiens	1	0	0	0	0	0	0	0	0	0	0	0	0	0	0	0	0	0	0	0
ARG2	384	symbol	H. sapiens	384	H. sapiens	1	0	0	0	0	1	0	1	0	0	0	0	0	0	0	0	0	0	0	0
KRBA1	84626	symbol	H. sapiens	84626	H. sapiens	0	0	0	0	0	0	0	0	0	0	0	0	0	0	0	0	0	0	0	0
WT1	7490	symbol	H. sapiens	7490	H. sapiens	0	0	1	0	0	0	1	0	0	0	0	1	0	0	0	0	0	0	0	0
SLC47A1	55244	symbol	H. sapiens	55244	H. sapiens	0	0	0	0	0	0	0	0	0	0	0	0	0	0	0	0	0	0	0	1
GALNT17	64409	symbol	H. sapiens	64409	H. sapiens	0	0	0	0	0	0	0	0	0	0	0	0	0	0	0	0	0	0	0	0
SEC11A	23478	symbol	H. sapiens	23478	H. sapiens	1	0	0	0	0	0	0	0	0	0	0	0	0	0	0	0	0	0	0	0
PPP1R12C	54776	symbol	H. sapiens	54776	H. sapiens	0	0	0	0	0	0	0	0	0	0	0	0	0	0	0	1	0	0	0	0
CIB2	10518	symbol	H. sapiens	10518	H. sapiens	0	0	0	1	0	0	0	0	0	0	0	0	0	0	0	1	0	0	1	0
NTN1	9423	symbol	H. sapiens	9423	H. sapiens	0	0	0	0	0	1	1	0	0	0	0	1	0	1	0	0	0	0	0	0
MAP2K3	5606	symbol	H. sapiens	5606	H. sapiens	1	0	1	0	0	1	0	1	1	1	0	0	0	0	0	1	0	1	0	0
ADAMTSL5	339366	symbol	H. sapiens	339366	H. sapiens	0	0	0	0	0	0	0	0	0	0	0	0	0	0	0	0	0	0	0	0
KLHL4	56062	symbol	H. sapiens	56062	H. sapiens	0	0	0	0	1	0	0	0	0	0	0	0	0	0	0	0	0	0	0	0
PLD5	200150	symbol	H. sapiens	200150	H. sapiens	0	0	0	0	0	0	0	0	0	0	0	0	0	0	0	0	0	0	0	0
KCNJ4	3761	symbol	H. sapiens	3761	H. sapiens	0	0	0	0	0	0	0	1	0	0	0	0	0	0	0	0	0	0	0	1
MGAT3	4248	symbol	H. sapiens	4248	H. sapiens	0	0	0	0	0	0	0	0	0	0	0	0	0	0	0	0	0	0	0	0
TPM2	7169	symbol	H. sapiens	7169	H. sapiens	0	1	1	0	1	0	0	1	0	0	0	0	0	0	0	1	0	0	1	0
XKR4	114786	symbol	H. sapiens	114786	H. sapiens	0	0	0	0	0	0	0	0	0	0	0	0	0	0	0	0	0	0	0	0
S100A11	6282	symbol	H. sapiens	6282	H. sapiens	0	0	0	1	0	1	0	0	0	0	0	0	0	0	0	0	0	0	1	0
THBS4	7060	symbol	H. sapiens	7060	H. sapiens	0	0	0	1	0	1	0	0	0	1	0	0	0	0	0	1	0	0	0	0
ENO2	2026	symbol	H. sapiens	2026	H. sapiens	1	1	0	0	0	0	0	0	0	0	0	0	0	0	0	0	0	0	0	0
PGK1	5230	symbol	H. sapiens	5230	H. sapiens	1	0	0	0	0	0	1	0	0	1	1	0	0	0	0	0	1	1	0	0
HSPA1L	3305	symbol	H. sapiens	3305	H. sapiens	0	0	0	0	0	0	0	0	0	0	0	0	0	0	0	0	0	0	0	0
ENO3	2027	symbol	H. sapiens	2027	H. sapiens	1	0	1	0	0	0	0	0	0	0	0	0	1	0	0	0	0	0	0	0
ADPRM	56985	symbol	H. sapiens	56985	H. sapiens	0	0	0	0	0	0	0	0	0	0	0	0	0	0	0	0	0	0	0	0
ITGA7	3679	symbol	H. sapiens	3679	H. sapiens	0	0	1	1	0	0	0	0	0	0	0	0	0	0	0	1	0	0	0	0
DIAPH3	81624	symbol	H. sapiens	81624	H. sapiens	0	0	0	1	1	0	0	0	0	0	0	0	0	0	0	1	0	0	0	0
CMTM3	123920	symbol	H. sapiens	123920	H. sapiens	0	0	0	0	0	0	0	0	0	0	0	0	0	1	0	0	0	0	0	0
TRMT112	51504	symbol	H. sapiens	51504	H. sapiens	0	0	0	0	0	0	0	0	0	0	0	0	0	0	0	0	0	0	1	0
GADD45A	1647	symbol	H. sapiens	1647	H. sapiens	0	1	0	0	0	0	0	0	1	1	0	0	1	0	0	0	0	0	1	0
UQCRH	7388	symbol	H. sapiens	7388	H. sapiens	1	0	0	0	0	0	0	1	0	0	0	0	0	0	0	0	0	0	0	1
MIXL1	83881	symbol	H. sapiens	83881	H. sapiens	0	0	1	0	0	0	0	0	0	0	0	0	1	0	0	0	0	0	1	0
NDUFB2	4708	symbol	H. sapiens	4708	H. sapiens	1	0	0	0	0	0	0	0	0	0	0	0	0	0	0	0	0	0	0	0
SNRPE	6635	symbol	H. sapiens	6635	H. sapiens	0	0	0	0	0	0	0	0	0	0	0	0	0	0	0	0	0	0	0	0
ARVCF	421	symbol	H. sapiens	421	H. sapiens	0	0	0	1	0	0	0	0	0	0	0	0	0	0	0	0	0	0	0	0
NRG2	9542	symbol	H. sapiens	9542	H. sapiens	0	0	0	0	0	0	0	0	0	0	0	0	0	0	0	0	0	0	0	0
CNN1	1264	symbol	H. sapiens	1264	H. sapiens	0	0	1	0	1	0	0	1	0	0	0	0	0	0	0	0	0	0	0	0
SV2C	22987	symbol	H. sapiens	22987	H. sapiens	0	0	0	0	0	0	0	0	0	0	0	0	0	0	0	1	0	0	0	0
BMP2	650	symbol	H. sapiens	650	H. sapiens	0	0	1	0	0	1	1	1	1	0	0	1	1	0	0	1	1	1	0	0
CHMP4C	92421	symbol	H. sapiens	92421	H. sapiens	0	0	0	0	0	0	0	0	0	0	0	0	0	0	0	1	0	0	1	0
RN7SL3	378707	symbol	H. sapiens	378707	H. sapiens	0	0	0	0	0	0	0	0	0	0	0	0	0	0	0	0	0	0	0	0
NDUFS5	4725	symbol	H. sapiens	4725	H. sapiens	1	0	0	0	0	0	0	0	0	0	0	0	0	0	0	0	0	0	0	0
SH3GL3	6457	symbol	H. sapiens	6457	H. sapiens	0	0	0	0	0	0	0	0	0	0	0	0	0	0	0	0	0	0	0	0
POMP	51371	symbol	H. sapiens	51371	H. sapiens	0	0	0	0	0	0	0	0	0	0	0	0	0	0	0	0	0	0	0	0
TRIM9	114088	symbol	H. sapiens	114088	H. sapiens	0	0	0	0	0	0	0	0	0	0	1	0	0	0	0	0	0	0	1	0
CD47	961	symbol	H. sapiens	961	H. sapiens	0	0	0	1	0	1	0	0	0	1	0	0	0	0	0	1	0	0	0	0
ST6GALNAC4	27090	symbol	H. sapiens	27090	H. sapiens	1	0	0	0	0	0	0	0	0	0	0	0	0	0	0	0	0	0	0	0
LAD1	3898	symbol	H. sapiens	3898	H. sapiens	0	0	0	1	0	0	0	0	0	0	0	0	0	0	0	0	0	0	0	0
SWAP70	23075	symbol	H. sapiens	23075	H. sapiens	0	0	0	1	1	1	0	0	0	0	0	0	1	0	0	0	0	0	0	0
NEU3	10825	symbol	H. sapiens	10825	H. sapiens	1	0	0	0	0	0	0	0	0	0	0	0	0	0	0	0	0	0	0	0
PXDC1	221749	symbol	H. sapiens	221749	H. sapiens	0	0	0	0	0	0	0	0	0	0	0	0	0	0	0	0	0	0	0	0
EPHA4	2043	symbol	H. sapiens	2043	H. sapiens	0	0	0	0	0	1	1	0	0	0	0	1	0	1	0	0	0	0	0	0
DUSP1	1843	symbol	H. sapiens	1843	H. sapiens	1	0	0	0	0	1	0	0	1	0	0	0	0	0	0	0	0	0	0	0
WT1-AS	51352	symbol	H. sapiens	51352	H. sapiens	0	0	0	0	0	0	0	0	0	0	0	0	0	0	0	0	0	0	0	0
VEGFA	7422	symbol	H. sapiens	7422	H. sapiens	1	1	1	0	0	1	1	1	1	1	1	1	0	1	0	1	1	1	1	0
RPL41	6171	symbol	H. sapiens	6171	H. sapiens	0	0	0	0	0	0	0	0	0	0	0	0	0	1	0	0	0	0	0	0
RRAS	6237	symbol	H. sapiens	6237	H. sapiens	0	0	0	0	0	1	0	0	0	1	0	0	0	1	0	1	0	0	0	0
TCAP	8557	symbol	H. sapiens	8557	H. sapiens	0	0	1	0	1	0	1	1	0	0	0	1	0	1	1	0	0	0	0	1
GAS2	2620	symbol	H. sapiens	2620	H. sapiens	0	0	0	0	1	0	0	0	0	0	0	0	0	0	0	0	0	0	0	0
RRAS2	22800	symbol	H. sapiens	22800	H. sapiens	0	0	0	0	0	1	0	0	0	0	0	0	0	0	0	1	0	0	0	0
SCARNA7	677767	symbol	H. sapiens	677767	H. sapiens	0	0	0	0	0	0	0	0	0	0	0	0	0	0	0	0	0	0	0	0
COX5B	1329	symbol	H. sapiens	1329	H. sapiens	1	0	0	0	0	0	0	1	0	0	0	0	0	0	0	0	0	0	0	1
EPHA2	1969	symbol	H. sapiens	1969	H. sapiens	1	0	0	1	0	1	1	0	0	1	0	1	0	1	0	1	0	1	0	0
CTNNAL1	8727	symbol	H. sapiens	8727	H. sapiens	0	0	0	1	1	0	0	0	0	0	0	0	0	0	0	0	0	0	0	0
MRPL33	9553	symbol	H. sapiens	9553	H. sapiens	0	0	0	0	0	0	0	0	0	0	0	0	0	0	0	0	0	0	0	0
WIPF3	644150	symbol	H. sapiens	644150	H. sapiens	0	0	0	0	1	0	0	0	0	0	0	0	0	0	0	0	0	0	0	1
BUD31	8896	symbol	H. sapiens	8896	H. sapiens	0	0	0	0	0	0	0	0	0	0	0	0	0	0	0	0	0	0	0	0
IGFBP2	3485	symbol	H. sapiens	3485	H. sapiens	0	1	0	0	0	1	0	0	0	0	1	0	0	0	0	0	0	0	0	0
TNNC1	7134	symbol	H. sapiens	7134	H. sapiens	0	0	1	0	1	0	1	1	0	0	0	0	0	0	0	1	0	0	1	0
ACTN2	88	symbol	H. sapiens	88	H. sapiens	0	0	1	1	1	0	0	1	0	0	0	0	0	1	1	1	0	0	0	1
RPL38	6169	symbol	H. sapiens	6169	H. sapiens	0	0	1	0	0	0	0	0	0	0	0	0	0	1	0	1	0	0	0	0
ZNF385D	79750	symbol	H. sapiens	79750	H. sapiens	0	0	0	0	0	0	0	0	0	0	0	0	0	0	0	0	0	0	0	0
BCYRN1	618	symbol	H. sapiens	618	H. sapiens	0	0	0	0	0	0	0	0	0	0	0	0	0	0	0	0	0	0	0	0
SPOCK2	9806	symbol	H. sapiens	9806	H. sapiens	0	0	0	0	0	1	0	0	0	0	0	0	0	0	0	1	0	0	0	0
MTCL1	23255	symbol	H. sapiens	23255	H. sapiens	0	0	0	0	0	0	0	0	0	0	0	0	0	0	0	0	0	0	1	0
SKA1	220134	symbol	H. sapiens	220134	H. sapiens	0	0	0	0	0	0	0	0	0	0	0	0	0	0	0	0	0	0	0	0
EDA2R	60401	symbol	H. sapiens	60401	H. sapiens	0	0	0	0	0	0	0	0	0	0	0	0	0	0	0	0	0	0	0	0
SACS	26278	symbol	H. sapiens	26278	H. sapiens	0	0	0	0	0	0	0	0	0	0	0	0	0	0	0	0	0	0	0	0
MEMO1	7795	symbol	H. sapiens	7795	H. sapiens	0	0	0	0	0	0	0	0	0	0	0	0	0	0	0	0	0	0	0	0
COL3A1	1281	symbol	H. sapiens	1281	H. sapiens	0	1	1	1	1	0	1	1	0	0	0	1	0	1	0	1	0	0	0	0
FLRT2	23768	symbol	H. sapiens	23768	H. sapiens	0	0	1	0	0	0	0	1	0	0	0	0	0	1	0	0	0	0	0	0
SYNPO	11346	symbol	H. sapiens	11346	H. sapiens	0	0	0	0	1	0	0	0	0	0	0	0	0	0	0	0	0	0	0	0
MFGE8	4240	symbol	H. sapiens	4240	H. sapiens	0	0	0	1	0	0	0	0	0	0	0	1	0	0	0	1	0	0	0	0
PHLDA1	22822	symbol	H. sapiens	22822	H. sapiens	0	0	0	0	0	0	0	0	1	0	0	0	1	0	0	0	0	0	0	0
ALDH3A2	224	symbol	H. sapiens	224	H. sapiens	1	0	0	0	0	0	0	0	0	0	0	0	0	0	0	0	0	0	1	0
RIMS4	140730	symbol	H. sapiens	140730	H. sapiens	0	0	0	0	0	0	0	0	0	0	0	0	0	0	0	0	0	0	0	1
NDUFB3	4709	symbol	H. sapiens	4709	H. sapiens	1	0	0	0	0	0	0	0	0	0	0	0	0	0	0	0	0	0	0	0
HCFC1R1	54985	symbol	H. sapiens	54985	H. sapiens	0	0	0	0	0	0	0	0	0	0	0	0	0	0	0	0	0	0	0	0
MIIP	60672	symbol	H. sapiens	60672	H. sapiens	0	0	0	0	0	0	0	0	0	0	0	0	0	0	0	0	0	0	0	0
FEM1B	10116	symbol	H. sapiens	10116	H. sapiens	0	0	0	0	0	0	1	0	0	0	0	0	0	0	0	0	0	0	0	0
CKS2	1164	symbol	H. sapiens	1164	H. sapiens	0	0	0	0	0	0	0	0	0	0	0	1	0	0	0	0	0	0	0	0
PAQR8	85315	symbol	H. sapiens	85315	H. sapiens	0	0	0	0	0	0	0	0	0	0	0	0	0	0	0	0	0	0	0	0
INPP4B	8821	symbol	H. sapiens	8821	H. sapiens	1	0	0	0	0	0	0	0	0	0	0	0	0	0	0	0	0	1	0	0
CAVIN2	8436	symbol	H. sapiens	8436	H. sapiens	0	0	0	0	0	0	0	0	0	0	0	0	0	0	0	0	0	0	0	0
MID1	4281	symbol	H. sapiens	4281	H. sapiens	0	0	0	0	0	0	0	0	0	0	0	0	0	0	0	0	0	0	1	0
CHEK1	1111	symbol	H. sapiens	1111	H. sapiens	0	0	0	0	0	0	0	0	0	0	0	1	0	0	0	0	0	0	0	0
FHL1	2273	symbol	H. sapiens	2273	H. sapiens	0	0	1	0	0	0	0	0	0	0	0	0	0	0	0	0	0	0	0	1
AIF1L	83543	symbol	H. sapiens	83543	H. sapiens	0	0	0	0	1	0	0	0	0	0	0	0	0	0	0	0	0	0	0	0
KLF6	1316	symbol	H. sapiens	1316	H. sapiens	1	0	0	0	0	0	0	0	1	0	0	0	1	0	0	0	0	0	0	0
PURPL	643401	symbol	H. sapiens	643401	H. sapiens	0	0	0	0	0	0	0	0	0	0	0	0	0	0	0	0	0	0	0	0
MGST3	4259	symbol	H. sapiens	4259	H. sapiens	1	0	0	0	0	0	0	0	0	0	0	0	0	0	0	0	0	0	0	0
SDC3	9672	symbol	H. sapiens	9672	H. sapiens	1	0	0	0	0	0	0	0	0	0	0	0	0	0	0	1	0	0	0	0
PANX1	24145	symbol	H. sapiens	24145	H. sapiens	0	0	0	0	1	0	0	0	1	0	0	0	0	0	0	0	0	0	0	1
AZIN1	51582	symbol	H. sapiens	51582	H. sapiens	1	0	0	0	0	0	0	0	0	0	0	0	0	0	0	0	0	0	0	1
AEN	64782	symbol	H. sapiens	64782	H. sapiens	0	0	0	0	0	0	0	0	0	0	0	0	0	0	0	0	0	0	0	0
FAM122B	159090	gene_synonym	H. sapiens	159090	H. sapiens	0	0	0	0	0	0	0	0	0	0	0	0	0	0	0	0	0	0	0	0
TMED9	54732	symbol	H. sapiens	54732	H. sapiens	0	0	0	0	0	0	0	0	0	0	0	0	0	0	0	0	0	0	0	0
PEA15	8682	symbol	H. sapiens	8682	H. sapiens	0	0	0	0	0	0	0	0	0	0	0	0	0	0	0	0	0	0	0	1
KIFC1	3833	symbol	H. sapiens	3833	H. sapiens	0	0	1	0	0	0	0	0	0	0	0	0	0	0	0	0	0	0	0	0
RAB31	11031	symbol	H. sapiens	11031	H. sapiens	0	0	0	0	0	0	0	0	0	0	0	0	0	0	0	0	0	0	0	0
SLC25A14	9016	symbol	H. sapiens	9016	H. sapiens	1	0	0	0	0	0	0	0	0	0	0	0	0	0	0	0	0	0	0	1
DYNC1LI1	51143	symbol	H. sapiens	51143	H. sapiens	0	0	0	0	0	0	0	0	0	0	0	0	0	0	0	0	0	0	0	0
EEF1A2	1917	symbol	H. sapiens	1917	H. sapiens	0	0	0	0	0	0	0	0	0	0	0	0	0	0	0	0	0	0	0	0
GORAB	92344	symbol	H. sapiens	92344	H. sapiens	0	0	0	0	0	0	1	0	0	0	0	0	0	0	0	0	0	0	0	0
EPHB4	2050	symbol	H. sapiens	2050	H. sapiens	0	0	1	0	0	0	0	1	0	0	0	1	0	1	0	0	0	0	0	0
CLMN	79789	symbol	H. sapiens	79789	H. sapiens	0	0	0	0	1	0	0	0	0	0	0	0	0	1	0	0	0	0	0	0
MN1	4330	symbol	H. sapiens	4330	H. sapiens	0	0	0	0	0	0	0	0	0	0	0	0	0	0	0	0	0	0	0	0
P3H2	55214	symbol	H. sapiens	55214	H. sapiens	0	0	0	0	0	0	0	0	0	0	0	0	0	0	0	0	0	0	0	0
TMEM120A	83862	symbol	H. sapiens	83862	H. sapiens	0	0	0	0	0	0	0	0	0	0	0	0	0	0	0	0	0	0	0	1
MPP5	64398	gene_synonym	H. sapiens	64398	H. sapiens	0	0	1	0	0	0	1	0	0	0	0	0	0	1	0	0	0	0	0	0
PTPRE	5791	symbol	H. sapiens	5791	H. sapiens	0	0	0	0	0	0	0	0	1	0	0	0	0	0	0	0	0	0	0	0
TENM3	55714	symbol	H. sapiens	55714	H. sapiens	0	0	0	1	0	1	0	0	0	0	0	0	0	1	0	0	0	0	1	0
P4HA2	8974	symbol	H. sapiens	8974	H. sapiens	1	0	0	0	0	0	0	0	0	0	0	0	0	0	0	0	0	1	0	0
ITGB1	3688	symbol	H. sapiens	3688	H. sapiens	0	1	1	1	1	1	1	0	0	1	0	1	0	1	0	1	0	1	1	1
PREP	5550	symbol	H. sapiens	5550	H. sapiens	0	0	0	0	0	0	0	0	0	0	0	0	0	0	0	0	0	0	0	0
SELENOK	58515	symbol	H. sapiens	58515	H. sapiens	0	0	0	0	0	1	0	0	0	0	0	0	0	0	0	0	0	0	0	0
DNAJC25	548645	symbol	H. sapiens	548645	H. sapiens	0	0	0	0	0	0	0	0	0	0	0	0	0	0	0	0	0	0	0	0
RFTN1	23180	symbol	H. sapiens	23180	H. sapiens	0	0	0	0	0	0	0	0	0	0	0	0	0	0	0	0	0	0	0	0
CPVL	54504	symbol	H. sapiens	54504	H. sapiens	0	0	0	0	0	0	0	0	0	0	0	0	0	0	0	0	0	0	0	0
PTCHD4	442213	symbol	H. sapiens	442213	H. sapiens	0	0	0	0	0	0	0	0	0	0	0	0	0	0	0	0	0	0	0	0
RICTOR	253260	symbol	H. sapiens	253260	H. sapiens	0	0	0	0	1	0	0	0	0	0	0	0	0	0	0	0	0	1	0	0
CCDC80	151887	symbol	H. sapiens	151887	H. sapiens	0	0	0	0	0	1	0	0	0	0	0	0	0	0	0	0	0	0	0	0
RPS27L	51065	symbol	H. sapiens	51065	H. sapiens	0	0	1	0	0	0	0	0	0	0	0	0	0	1	0	0	0	0	0	0
ST3GAL6	10402	symbol	H. sapiens	10402	H. sapiens	1	0	0	0	0	0	0	0	0	0	0	0	0	0	0	0	0	0	0	0
LACTB	114294	symbol	H. sapiens	114294	H. sapiens	0	0	0	0	0	0	0	0	0	0	0	0	0	0	0	0	0	0	0	0
TSPAN12	23554	symbol	H. sapiens	23554	H. sapiens	0	0	0	0	0	0	0	0	0	1	0	1	0	0	0	0	0	0	0	0
GPHN	10243	symbol	H. sapiens	10243	H. sapiens	0	0	0	0	0	0	0	0	0	0	0	0	0	0	0	0	0	0	0	0
FUT11	170384	symbol	H. sapiens	170384	H. sapiens	1	0	0	0	0	0	0	0	0	0	0	0	0	0	0	0	0	0	0	0
CD63	967	symbol	H. sapiens	967	H. sapiens	0	0	0	0	0	0	0	0	0	0	0	0	0	0	0	1	0	0	0	1
ST8SIA5	29906	symbol	H. sapiens	29906	H. sapiens	1	0	0	0	0	0	0	0	0	0	0	0	0	0	0	0	0	0	0	0
CDK18	5129	symbol	H. sapiens	5129	H. sapiens	0	0	0	0	0	0	0	0	0	0	0	0	0	0	0	0	0	0	0	0
BEX1	55859	symbol	H. sapiens	55859	H. sapiens	0	0	0	0	0	0	0	0	0	0	0	0	0	0	0	0	0	0	0	0
SFRP1	6422	symbol	H. sapiens	6422	H. sapiens	0	1	0	0	0	1	1	0	0	1	0	1	0	1	0	0	1	0	0	0
GLUL	2752	symbol	H. sapiens	2752	H. sapiens	1	0	0	0	0	0	0	0	0	1	0	1	0	0	0	0	0	0	0	0
BAMBI	25805	symbol	H. sapiens	25805	H. sapiens	0	0	0	0	0	0	0	0	0	0	0	0	0	0	0	0	0	0	0	0
SLC16A1	6566	symbol	H. sapiens	6566	H. sapiens	0	0	0	0	0	0	0	1	0	0	1	0	0	0	0	1	0	0	0	0
PMEPA1	56937	symbol	H. sapiens	56937	H. sapiens	0	1	0	0	0	0	0	0	1	0	0	0	0	0	0	0	0	0	0	0
PPP1CB	5500	symbol	H. sapiens	5500	H. sapiens	1	0	0	0	0	1	0	1	0	0	0	0	0	0	0	1	0	0	0	0
TPT1	7178	symbol	H. sapiens	7178	H. sapiens	0	0	0	0	0	0	0	0	0	0	0	0	0	0	0	0	0	0	0	0
MAOB	4129	symbol	H. sapiens	4129	H. sapiens	1	0	0	0	0	0	0	0	0	0	0	0	0	0	0	0	0	0	0	1
DYSF	8291	symbol	H. sapiens	8291	H. sapiens	0	0	1	0	0	0	0	1	0	0	0	0	0	0	0	0	0	0	0	0
UBC	7316	symbol	H. sapiens	7316	H. sapiens	1	0	0	0	0	0	0	0	0	0	0	0	0	1	0	0	0	0	0	0
SYNM	23336	symbol	H. sapiens	23336	H. sapiens	0	0	0	0	0	0	0	1	0	0	0	0	0	0	0	0	0	0	0	0
ANKRD9	122416	symbol	H. sapiens	122416	H. sapiens	0	0	0	0	0	0	0	0	0	0	0	0	0	0	0	0	0	0	0	0
ESF1	51575	symbol	H. sapiens	51575	H. sapiens	0	0	0	0	0	0	0	0	0	0	0	0	0	0	0	0	0	0	0	0
TARS1	6897	symbol	H. sapiens	6897	H. sapiens	0	0	0	0	0	0	0	0	0	0	0	0	0	0	0	0	0	0	0	0
RAB11FIP1	80223	symbol	H. sapiens	80223	H. sapiens	0	0	0	0	0	0	0	0	0	0	0	0	0	0	0	0	0	0	0	0
VASH1	22846	symbol	H. sapiens	22846	H. sapiens	0	0	0	0	1	0	0	0	0	1	0	1	0	0	0	0	0	0	0	0
HMGA2	8091	symbol	H. sapiens	8091	H. sapiens	1	0	0	0	0	0	1	0	0	1	1	1	0	0	0	1	0	0	0	0
C12orf75	387882	symbol	H. sapiens	387882	H. sapiens	0	0	0	0	0	0	0	0	0	0	0	0	0	0	0	0	0	0	0	0
ARMCX3	51566	symbol	H. sapiens	51566	H. sapiens	0	0	0	0	0	0	0	0	0	0	0	0	0	0	0	0	0	0	0	0
EFNB2	1948	symbol	H. sapiens	1948	H. sapiens	0	0	0	0	0	1	1	0	0	0	0	1	0	1	0	1	0	0	0	0
CAVIN1	284119	symbol	H. sapiens	284119	H. sapiens	1	0	0	0	0	1	0	0	0	0	0	0	0	0	0	0	0	0	0	0
CD151	977	symbol	H. sapiens	977	H. sapiens	0	0	0	1	0	1	1	0	0	0	0	1	0	0	0	1	0	0	0	0
PLCL1	5334	symbol	H. sapiens	5334	H. sapiens	0	0	0	0	0	0	0	0	0	0	0	0	0	0	0	0	0	0	0	0
UGCG	7357	symbol	H. sapiens	7357	H. sapiens	0	0	0	0	0	0	1	0	0	0	0	0	0	0	0	0	0	0	0	0
NDUFB6	4712	symbol	H. sapiens	4712	H. sapiens	1	0	0	0	0	0	0	0	0	0	0	0	0	0	0	0	0	0	0	0
FARP1	10160	symbol	H. sapiens	10160	H. sapiens	0	0	0	0	1	0	0	0	0	0	0	0	0	1	0	0	0	0	0	0
MOSPD1	56180	symbol	H. sapiens	56180	H. sapiens	0	0	0	0	0	0	0	0	0	0	0	0	0	0	0	0	0	0	0	0
HSPA9	3313	symbol	H. sapiens	3313	H. sapiens	1	0	0	0	0	0	0	0	0	0	0	0	0	0	0	0	0	0	0	0
GPNMB	10457	symbol	H. sapiens	10457	H. sapiens	0	0	0	1	0	1	0	0	0	1	0	0	0	1	0	1	0	0	0	0
ESYT1	23344	symbol	H. sapiens	23344	H. sapiens	0	0	0	0	0	0	0	0	0	0	0	0	0	0	0	0	0	0	0	0
COL12A1	1303	symbol	H. sapiens	1303	H. sapiens	0	1	0	0	1	0	0	0	0	0	0	0	0	0	0	0	0	0	0	0
GLRB	2743	symbol	H. sapiens	2743	H. sapiens	0	0	0	0	0	0	0	1	0	0	0	0	0	0	0	0	0	0	0	1
AHR	196	symbol	H. sapiens	196	H. sapiens	0	0	0	0	0	0	0	0	0	0	0	1	1	0	0	0	0	0	1	0
DES	1674	symbol	H. sapiens	1674	H. sapiens	0	0	1	0	1	0	0	1	0	0	0	0	0	0	0	1	0	0	0	0
CEBPG	1054	symbol	H. sapiens	1054	H. sapiens	0	0	0	0	0	0	1	0	0	0	0	0	0	0	0	0	0	0	0	0
ADSS1	122622	symbol	H. sapiens	122622	H. sapiens	1	0	0	0	0	0	0	0	0	0	0	0	0	0	0	0	0	0	0	0
TMCO3	55002	symbol	H. sapiens	55002	H. sapiens	0	0	0	0	0	0	0	0	0	0	0	0	0	0	0	0	0	0	0	1
PTGIS	5740	symbol	H. sapiens	5740	H. sapiens	1	0	1	0	0	0	0	0	0	1	0	0	1	0	0	0	1	0	0	0

## Sheet: Enrichment
GroupID	Category	Term	Description	LogP	Log(q-value)	InTerm_InList	Genes	Symbols
1_Summary	Hallmark Gene Sets	M5891	HALLMARK HYPOXIA	-13.2209	-9.08426	20/200	1316,1843,2023,2026,2027,2632,3099,3939,5033,5230,6095,6533,6781,7167,7422,8553,8974,9672,26355,284119,5223,6662,6676,9123,477,1329,4708,4709,4712,4725,7388,3313,5606,7277,23478,116496,224,4129,5500,9016,79365,1969,4878,4879,6783,7371,23597,122622,5740,27231,1464,7316,10402,10678,92126,170384,384,2752,10825,8128,8821,27090,29906,8091,4259,51582,79094	KLF6,DUSP1,ENO1,ENO2,ENO3,GBE1,HK2,LDHA,P4HA1,PGK1,RORA,SLC6A6,STC1,TPI1,VEGFA,BHLHE40,P4HA2,SDC3,FAM162A,CAVIN1,PGAM1,SOX9,SPAG4,SLC16A3,ATP1A2,COX5B,NDUFB2,NDUFB3,NDUFB6,NDUFS5,UQCRH,HSPA9,MAP2K3,TUBA4A,SEC11A,NIBAN1,ALDH3A2,MAOB,PPP1CB,SLC25A14,BHLHE41,EPHA2,NPPA,NPPB,SULT1E1,UCK2,ACOT9,ADSS1,PTGIS,NMRK2,CSPG4,UBC,ST3GAL6,B3GNT2,DSEL,FUT11,ARG2,GLUL,NEU3,ST8SIA2,INPP4B,ST6GALNAC4,ST8SIA5,HMGA2…
1_Member	Hallmark Gene Sets	M5891	HALLMARK HYPOXIA	-13.2209	-9.08426	20/200	1316,1843,2023,2026,2027,2632,3099,3939,5033,5230,6095,6533,6781,7167,7422,8553,8974,9672,26355,284119	KLF6,DUSP1,ENO1,ENO2,ENO3,GBE1,HK2,LDHA,P4HA1,PGK1,RORA,SLC6A6,STC1,TPI1,VEGFA,BHLHE40,P4HA2,SDC3,FAM162A,CAVIN1
1_Member	Hallmark Gene Sets	M5937	HALLMARK GLYCOLYSIS	-9.23742	-6.16152	16/200	2023,2026,3099,3939,5033,5223,5230,6662,6676,6781,7167,7422,8974,9123,9672,26355	ENO1,ENO2,HK2,LDHA,P4HA1,PGAM1,PGK1,SOX9,SPAG4,STC1,TPI1,VEGFA,P4HA2,SLC16A3,SDC3,FAM162A
1_Member	GO Biological Processes	GO:0046034	ATP metabolic process	-8.46261	-5.50631	15/195	477,1329,2023,2026,2027,3099,3939,4708,4709,4712,4725,5223,5230,7167,7388	ATP1A2,COX5B,ENO1,ENO2,ENO3,HK2,LDHA,NDUFB2,NDUFB3,NDUFB6,NDUFS5,PGAM1,PGK1,TPI1,UQCRH
1_Member	Hallmark Gene Sets	M5924	HALLMARK MTORC1 SIGNALING	-8.31236	-5.40621	15/200	2023,2632,3099,3313,3939,5033,5230,5606,6533,6781,7167,7277,8553,23478,116496	ENO1,GBE1,HK2,HSPA9,LDHA,P4HA1,PGK1,MAP2K3,SLC6A6,STC1,TPI1,TUBA4A,BHLHE40,SEC11A,NIBAN1
1_Member	GO Biological Processes	GO:0006096	glycolytic process	-8.14142	-5.2601	8/39	2023,2026,2027,3099,3939,5223,5230,7167	ENO1,ENO2,ENO3,HK2,LDHA,PGAM1,PGK1,TPI1
1_Member	GO Biological Processes	GO:0006757	ATP generation from ADP	-8.04855	-5.17912	8/40	2023,2026,2027,3099,3939,5223,5230,7167	ENO1,ENO2,ENO3,HK2,LDHA,PGAM1,PGK1,TPI1
1_Member	WikiPathways	WP534	Glycolysis and gluconeogenesis	-7.62111	-4.79627	8/45	2023,2026,2027,3099,3939,5223,5230,7167	ENO1,ENO2,ENO3,HK2,LDHA,PGAM1,PGK1,TPI1
1_Member	KEGG Pathway	hsa00010	Glycolysis / Gluconeogenesis	-7.39231	-4.58586	9/67	224,2023,2026,2027,3099,3939,5223,5230,7167	ALDH3A2,ENO1,ENO2,ENO3,HK2,LDHA,PGAM1,PGK1,TPI1
1_Member	GO Biological Processes	GO:0046031	ADP metabolic process	-7.39001	-4.58586	8/48	2023,2026,2027,3099,3939,5223,5230,7167	ENO1,ENO2,ENO3,HK2,LDHA,PGAM1,PGK1,TPI1
1_Member	GO Biological Processes	GO:0006091	generation of precursor metabolites and energy	-7.31356	-4.51939	19/388	1329,2023,2026,2027,2632,3099,3939,4129,4708,4709,4712,4725,5223,5230,5500,7167,7388,8974,9016	COX5B,ENO1,ENO2,ENO3,GBE1,HK2,LDHA,MAOB,NDUFB2,NDUFB3,NDUFB6,NDUFS5,PGAM1,PGK1,PPP1CB,TPI1,UQCRH,P4HA2,SLC25A14
1_Member	GO Biological Processes	GO:0006165	nucleoside diphosphate phosphorylation	-6.78489	-4.04624	8/57	2023,2026,2027,3099,3939,5223,5230,7167	ENO1,ENO2,ENO3,HK2,LDHA,PGAM1,PGK1,TPI1
1_Member	GO Biological Processes	GO:0046939	nucleotide phosphorylation	-6.72446	-3.99441	8/58	2023,2026,2027,3099,3939,5223,5230,7167	ENO1,ENO2,ENO3,HK2,LDHA,PGAM1,PGK1,TPI1
1_Member	GO Biological Processes	GO:0006090	pyruvate metabolic process	-6.60708	-3.88546	8/60	2023,2026,2027,3099,3939,5223,5230,7167	ENO1,ENO2,ENO3,HK2,LDHA,PGAM1,PGK1,TPI1
1_Member	GO Biological Processes	GO:0009135	purine nucleoside diphosphate metabolic process	-6.55006	-3.84483	8/61	2023,2026,2027,3099,3939,5223,5230,7167	ENO1,ENO2,ENO3,HK2,LDHA,PGAM1,PGK1,TPI1
1_Member	GO Biological Processes	GO:0009179	purine ribonucleoside diphosphate metabolic process	-6.55006	-3.84483	8/61	2023,2026,2027,3099,3939,5223,5230,7167	ENO1,ENO2,ENO3,HK2,LDHA,PGAM1,PGK1,TPI1
1_Member	WikiPathways	WP4018	Clear cell renal cell carcinoma pathways	-6.39454	-3.74225	9/87	2023,2026,2027,3099,3939,5230,7167,7422,79365	ENO1,ENO2,ENO3,HK2,LDHA,PGK1,TPI1,VEGFA,BHLHE41
1_Member	GO Biological Processes	GO:0009259	ribonucleotide metabolic process	-6.36968	-3.72737	16/320	1969,2023,2026,2027,3099,3939,4878,4879,5223,5230,6095,6783,7167,7371,23597,122622	EPHA2,ENO1,ENO2,ENO3,HK2,LDHA,NPPA,NPPB,PGAM1,PGK1,RORA,SULT1E1,TPI1,UCK2,ACOT9,ADSS1
1_Member	GO Biological Processes	GO:0009117	nucleotide metabolic process	-6.29332	-3.66187	18/408	1969,2023,2026,2027,3099,3939,4878,4879,5223,5230,5740,6095,6783,7167,7371,23597,27231,122622	EPHA2,ENO1,ENO2,ENO3,HK2,LDHA,NPPA,NPPB,PGAM1,PGK1,PTGIS,RORA,SULT1E1,TPI1,UCK2,ACOT9,NMRK2,ADSS1
1_Member	GO Biological Processes	GO:0019693	ribose phosphate metabolic process	-6.1924	-3.58926	16/330	1969,2023,2026,2027,3099,3939,4878,4879,5223,5230,6095,6783,7167,7371,23597,122622	EPHA2,ENO1,ENO2,ENO3,HK2,LDHA,NPPA,NPPB,PGAM1,PGK1,RORA,SULT1E1,TPI1,UCK2,ACOT9,ADSS1
1_Member	GO Biological Processes	GO:0006753	nucleoside phosphate metabolic process	-6.15669	-3.56417	18/417	1969,2023,2026,2027,3099,3939,4878,4879,5223,5230,5740,6095,6783,7167,7371,23597,27231,122622	EPHA2,ENO1,ENO2,ENO3,HK2,LDHA,NPPA,NPPB,PGAM1,PGK1,PTGIS,RORA,SULT1E1,TPI1,UCK2,ACOT9,NMRK2,ADSS1
1_Member	Reactome Gene Sets	R-HSA-71387	Metabolism of carbohydrates	-6.09922	-3.51893	15/295	1464,2023,2026,2027,2632,3099,5223,5230,7167,7316,9672,10402,10678,92126,170384	CSPG4,ENO1,ENO2,ENO3,GBE1,HK2,PGAM1,PGK1,TPI1,UBC,SDC3,ST3GAL6,B3GNT2,DSEL,FUT11
1_Member	GO Biological Processes	GO:0009185	ribonucleoside diphosphate metabolic process	-6.08034	-3.50604	8/70	2023,2026,2027,3099,3939,5223,5230,7167	ENO1,ENO2,ENO3,HK2,LDHA,PGAM1,PGK1,TPI1
1_Member	GO Biological Processes	GO:0009150	purine ribonucleotide metabolic process	-5.97184	-3.4207	15/302	1969,2023,2026,2027,3099,3939,4878,4879,5223,5230,6095,6783,7167,23597,122622	EPHA2,ENO1,ENO2,ENO3,HK2,LDHA,NPPA,NPPB,PGAM1,PGK1,RORA,SULT1E1,TPI1,ACOT9,ADSS1
1_Member	KEGG Pathway	hsa01230	Biosynthesis of amino acids	-5.84829	-3.3574	8/75	384,2023,2026,2027,2752,5223,5230,7167	ARG2,ENO1,ENO2,ENO3,GLUL,PGAM1,PGK1,TPI1
1_Member	Reactome Gene Sets	R-HSA-70263	Gluconeogenesis	-5.82679	-3.34341	6/34	2023,2026,2027,5223,5230,7167	ENO1,ENO2,ENO3,PGAM1,PGK1,TPI1
1_Member	GO Biological Processes	GO:0016052	carbohydrate catabolic process	-5.80554	-3.3317	9/102	2023,2026,2027,3099,3939,5223,5230,7167,10825	ENO1,ENO2,ENO3,HK2,LDHA,PGAM1,PGK1,TPI1,NEU3
1_Member	GO Biological Processes	GO:0006163	purine nucleotide metabolic process	-5.74487	-3.28125	15/315	1969,2023,2026,2027,3099,3939,4878,4879,5223,5230,6095,6783,7167,23597,122622	EPHA2,ENO1,ENO2,ENO3,HK2,LDHA,NPPA,NPPB,PGAM1,PGK1,RORA,SULT1E1,TPI1,ACOT9,ADSS1
1_Member	GO Biological Processes	GO:0072521	purine-containing compound metabolic process	-5.40235	-3.01168	15/336	1969,2023,2026,2027,3099,3939,4878,4879,5223,5230,6095,6783,7167,23597,122622	EPHA2,ENO1,ENO2,ENO3,HK2,LDHA,NPPA,NPPB,PGAM1,PGK1,RORA,SULT1E1,TPI1,ACOT9,ADSS1
1_Member	GO Molecular Functions	GO:0004634	phosphopyruvate hydratase activity	-5.31829	-2.94513	3/4	2023,2026,2027	ENO1,ENO2,ENO3
1_Member	GO Biological Processes	GO:0009132	nucleoside diphosphate metabolic process	-5.2827	-2.91696	8/89	2023,2026,2027,3099,3939,5223,5230,7167	ENO1,ENO2,ENO3,HK2,LDHA,PGAM1,PGK1,TPI1
1_Member	GO Biological Processes	GO:0055086	nucleobase-containing small molecule metabolic process	-5.26108	-2.90579	18/483	1969,2023,2026,2027,3099,3939,4878,4879,5223,5230,5740,6095,6783,7167,7371,23597,27231,122622	EPHA2,ENO1,ENO2,ENO3,HK2,LDHA,NPPA,NPPB,PGAM1,PGK1,PTGIS,RORA,SULT1E1,TPI1,UCK2,ACOT9,NMRK2,ADSS1
1_Member	WikiPathways	WP4629	Aerobic glycolysis	-5.2267	-2.88357	4/12	2023,3939,5230,7167	ENO1,LDHA,PGK1,TPI1
1_Member	Reactome Gene Sets	R-HSA-70171	Glycolysis	-4.95567	-2.67034	7/71	2023,2026,2027,3099,5223,5230,7167	ENO1,ENO2,ENO3,HK2,PGAM1,PGK1,TPI1
1_Member	GO Biological Processes	GO:0005975	carbohydrate metabolic process	-4.9291	-2.65495	17/462	2023,2026,2027,2632,3099,3939,5223,5230,5500,7167,8128,8821,10402,10678,10825,27090,29906	ENO1,ENO2,ENO3,GBE1,HK2,LDHA,PGAM1,PGK1,PPP1CB,TPI1,ST8SIA2,INPP4B,ST3GAL6,B3GNT2,NEU3,ST6GALNAC4,ST8SIA5
1_Member	KEGG Pathway	hsa04066	HIF-1 signaling pathway	-4.63218	-2.42755	8/109	2023,2026,2027,3099,3939,4878,5230,7422	ENO1,ENO2,ENO3,HK2,LDHA,NPPA,PGK1,VEGFA
1_Member	WikiPathways	WP1946	Cori cycle	-4.56309	-2.3764	4/17	3939,5223,5230,7167	LDHA,PGAM1,PGK1,TPI1
1_Member	Reactome Gene Sets	R-HSA-70326	Glucose metabolism	-4.25046	-2.14421	7/91	2023,2026,2027,3099,5223,5230,7167	ENO1,ENO2,ENO3,HK2,PGAM1,PGK1,TPI1
1_Member	WikiPathways	WP4290	Metabolic reprogramming in colon cancer	-3.98094	-1.95325	5/44	2023,3939,5223,5230,9123	ENO1,LDHA,PGAM1,PGK1,SLC16A3
1_Member	GO Biological Processes	GO:0019674	NAD metabolic process	-3.93895	-1.91797	4/24	2023,2026,3099,27231	ENO1,ENO2,HK2,NMRK2
1_Member	GO Biological Processes	GO:0006735	NADH regeneration	-3.72707	-1.76074	3/11	2023,2026,3099	ENO1,ENO2,HK2
1_Member	GO Biological Processes	GO:0061621	canonical glycolysis	-3.72707	-1.76074	3/11	2023,2026,3099	ENO1,ENO2,HK2
1_Member	GO Biological Processes	GO:0061718	glucose catabolic process to pyruvate	-3.72707	-1.76074	3/11	2023,2026,3099	ENO1,ENO2,HK2
1_Member	WikiPathways	WP5049	Glycolysis in senescence	-3.72707	-1.76074	3/11	2023,3939,5230	ENO1,LDHA,PGK1
1_Member	GO Molecular Functions	GO:0016835	carbon-oxygen lyase activity	-3.6866	-1.72754	6/79	2023,2026,2027,5740,7167,8091	ENO1,ENO2,ENO3,PTGIS,TPI1,HMGA2
1_Member	KEGG Pathway	hsa01200	Carbon metabolism	-3.61167	-1.67175	7/115	2023,2026,2027,3099,5223,5230,7167	ENO1,ENO2,ENO3,HK2,PGAM1,PGK1,TPI1
1_Member	GO Molecular Functions	GO:0016829	lyase activity	-3.5719	-1.64214	9/195	2023,2026,2027,4259,5740,7167,8091,51582,79094	ENO1,ENO2,ENO3,MGST3,PTGIS,TPI1,HMGA2,AZIN1,CHAC1
1_Member	GO Biological Processes	GO:0061615	glycolytic process through fructose-6-phosphate	-3.49508	-1.57991	3/13	2023,2026,3099	ENO1,ENO2,HK2
1_Member	GO Biological Processes	GO:0061620	glycolytic process through glucose-6-phosphate	-3.49508	-1.57991	3/13	2023,2026,3099	ENO1,ENO2,HK2
1_Member	GO Biological Processes	GO:0006007	glucose catabolic process	-3.30033	-1.43325	3/15	2023,2026,3099	ENO1,ENO2,HK2
1_Member	GO Biological Processes	GO:0016051	carbohydrate biosynthetic process	-2.78208	-1.06873	6/117	2026,2632,5230,7167,10402,10678	ENO2,GBE1,PGK1,TPI1,ST3GAL6,B3GNT2
1_Member	Reactome Gene Sets	R-HSA-9637690	Response of Mtb to phagocytosis	-2.73762	-1.02997	3/23	2023,5230,7316	ENO1,PGK1,UBC
1_Member	GO Biological Processes	GO:0006734	NADH metabolic process	-2.63096	-0.956015	3/25	2023,2026,3099	ENO1,ENO2,HK2
1_Member	Reactome Gene Sets	R-HSA-9635486	Infection with Mycobacterium tuberculosis	-2.53341	-0.886071	3/27	2023,5230,7316	ENO1,PGK1,UBC
1_Member	GO Biological Processes	GO:0019320	hexose catabolic process	-2.40127	-0.789718	3/30	2023,2026,3099	ENO1,ENO2,HK2
1_Member	GO Biological Processes	GO:0006006	glucose metabolic process	-2.36943	-0.761754	5/99	2023,2026,3099,5230,7167	ENO1,ENO2,HK2,PGK1,TPI1
1_Member	GO Biological Processes	GO:0006094	gluconeogenesis	-2.36048	-0.757275	3/31	2026,5230,7167	ENO2,PGK1,TPI1
1_Member	GO Molecular Functions	GO:0016836	hydro-lyase activity	-2.30768	-0.713907	4/64	2023,2026,2027,5740	ENO1,ENO2,ENO3,PTGIS
1_Member	GO Biological Processes	GO:0019319	hexose biosynthetic process	-2.24645	-0.670959	3/34	2026,5230,7167	ENO2,PGK1,TPI1
1_Member	GO Biological Processes	GO:0046365	monosaccharide catabolic process	-2.17656	-0.621459	3/36	2023,2026,3099	ENO1,ENO2,HK2
1_Member	GO Biological Processes	GO:0046364	monosaccharide biosynthetic process	-2.11093	-0.575305	3/38	2026,5230,7167	ENO2,PGK1,TPI1
2_Summary	Hallmark Gene Sets	M5930	HALLMARK EPITHELIAL MESENCHYMAL TRANSITION	-13.2209	-9.08426	20/200	374,388,1281,1303,1647,1809,2026,3485,3688,3690,5396,5999,6387,6422,6445,7169,7422,8572,10272,56937	AREG,RHOB,COL3A1,COL12A1,GADD45A,DPYSL3,ENO2,IGFBP2,ITGB1,ITGB3,PRRX1,RGS4,CXCL12,SFRP1,SGCG,TPM2,VEGFA,PDLIM4,FSTL3,PMEPA1
2_Member	Hallmark Gene Sets	M5930	HALLMARK EPITHELIAL MESENCHYMAL TRANSITION	-13.2209	-9.08426	20/200	374,388,1281,1303,1647,1809,2026,3485,3688,3690,5396,5999,6387,6422,6445,7169,7422,8572,10272,56937	AREG,RHOB,COL3A1,COL12A1,GADD45A,DPYSL3,ENO2,IGFBP2,ITGB1,ITGB3,PRRX1,RGS4,CXCL12,SFRP1,SGCG,TPM2,VEGFA,PDLIM4,FSTL3,PMEPA1
3_Summary	Hallmark Gene Sets	M5909	HALLMARK MYOGENESIS	-12.1851	-8.22456	19/200	58,88,844,859,1281,1674,2027,2273,3679,3688,4633,5740,6445,7134,7164,7169,8553,8557,58529,650,4878,4879,6662,7137,7422,7490,84525,129446,6095,8291,8572,27295,347273,100128927,2050,3764,5606,8862,23768,51196,83881,1272,64398,1264,3833,6169,51065	ACTA1,ACTN2,CASQ1,CAV3,COL3A1,DES,ENO3,FHL1,ITGA7,ITGB1,MYL2,PTGIS,SGCG,TNNC1,TPD52L1,TPM2,BHLHE40,TCAP,MYOZ1,BMP2,NPPA,NPPB,SOX9,TNNI3,VEGFA,WT1,HOPX,XIRP2,RORA,DYSF,PDLIM4,PDLIM3,CAVIN4,ZBTB42,EPHB4,KCNJ8,MAP2K3,APLN,FLRT2,PLCE1,MIXL1,CNTN1,PALS1,CNN1,KIFC1,RPL38,RPS27L
3_Member	Hallmark Gene Sets	M5909	HALLMARK MYOGENESIS	-12.1851	-8.22456	19/200	58,88,844,859,1281,1674,2027,2273,3679,3688,4633,5740,6445,7134,7164,7169,8553,8557,58529	ACTA1,ACTN2,CASQ1,CAV3,COL3A1,DES,ENO3,FHL1,ITGA7,ITGB1,MYL2,PTGIS,SGCG,TNNC1,TPD52L1,TPM2,BHLHE40,TCAP,MYOZ1
3_Member	GO Biological Processes	GO:0060537	muscle tissue development	-10.6781	-7.28186	21/306	58,88,650,844,859,1281,3679,3688,4633,4878,4879,6445,6662,7134,7137,7422,7490,8557,58529,84525,129446	ACTA1,ACTN2,BMP2,CASQ1,CAV3,COL3A1,ITGA7,ITGB1,MYL2,NPPA,NPPB,SGCG,SOX9,TNNC1,TNNI3,VEGFA,WT1,TCAP,MYOZ1,HOPX,XIRP2
3_Member	GO Biological Processes	GO:0061061	muscle structure development	-10.0111	-6.71958	25/480	58,88,650,844,859,1281,2273,3679,3688,4633,6095,6445,6662,7134,7137,7422,7490,8291,8557,8572,27295,58529,129446,347273,100128927	ACTA1,ACTN2,BMP2,CASQ1,CAV3,COL3A1,FHL1,ITGA7,ITGB1,MYL2,RORA,SGCG,SOX9,TNNC1,TNNI3,VEGFA,WT1,DYSF,TCAP,PDLIM4,PDLIM3,MYOZ1,XIRP2,CAVIN4,ZBTB42
3_Member	GO Biological Processes	GO:0007507	heart development	-9.61836	-6.39744	26/542	88,650,859,1281,2050,3688,3764,4633,4878,4879,5606,6445,6662,7134,7137,7422,7490,8557,8572,8862,23768,27295,51196,83881,84525,129446	ACTN2,BMP2,CAV3,COL3A1,EPHB4,ITGB1,KCNJ8,MYL2,NPPA,NPPB,MAP2K3,SGCG,SOX9,TNNC1,TNNI3,VEGFA,WT1,TCAP,PDLIM4,APLN,FLRT2,PDLIM3,PLCE1,MIXL1,HOPX,XIRP2
3_Member	GO Biological Processes	GO:0014706	striated muscle tissue development	-9.44958	-6.29071	19/287	58,88,650,844,859,3679,3688,4633,4878,4879,6445,7134,7137,7422,7490,8557,58529,84525,129446	ACTA1,ACTN2,BMP2,CASQ1,CAV3,ITGA7,ITGB1,MYL2,NPPA,NPPB,SGCG,TNNC1,TNNI3,VEGFA,WT1,TCAP,MYOZ1,HOPX,XIRP2
3_Member	GO Biological Processes	GO:0048738	cardiac muscle tissue development	-9.18221	-6.1248	15/173	88,650,859,3688,4633,4878,4879,6445,7134,7137,7422,7490,8557,84525,129446	ACTN2,BMP2,CAV3,ITGB1,MYL2,NPPA,NPPB,SGCG,TNNC1,TNNI3,VEGFA,WT1,TCAP,HOPX,XIRP2
3_Member	GO Biological Processes	GO:0007517	muscle organ development	-7.83969	-4.99313	17/285	58,650,844,859,1281,2273,3679,4633,6445,7134,7137,7490,8557,58529,129446,347273,100128927	ACTA1,BMP2,CASQ1,CAV3,COL3A1,FHL1,ITGA7,MYL2,SGCG,TNNC1,TNNI3,WT1,TCAP,MYOZ1,XIRP2,CAVIN4,ZBTB42
3_Member	GO Biological Processes	GO:0042692	muscle cell differentiation	-6.04481	-3.48224	14/259	58,88,650,844,859,3688,4633,6095,6662,7422,7490,8291,8557,58529	ACTA1,ACTN2,BMP2,CASQ1,CAV3,ITGB1,MYL2,RORA,SOX9,VEGFA,WT1,DYSF,TCAP,MYOZ1
3_Member	GO Biological Processes	GO:0010927	cellular component assembly involved in morphogenesis	-5.80554	-3.3317	9/102	58,88,844,1272,3688,4633,8557,58529,64398	ACTA1,ACTN2,CASQ1,CNTN1,ITGB1,MYL2,TCAP,MYOZ1,PALS1
3_Member	GO Biological Processes	GO:0055007	cardiac muscle cell differentiation	-5.43324	-3.03304	8/85	88,650,859,3688,4633,7422,7490,8557	ACTN2,BMP2,CAV3,ITGB1,MYL2,VEGFA,WT1,TCAP
3_Member	GO Biological Processes	GO:0030239	myofibril assembly	-5.40009	-3.01168	7/61	58,88,844,3688,4633,8557,58529	ACTA1,ACTN2,CASQ1,ITGB1,MYL2,TCAP,MYOZ1
3_Member	GO Biological Processes	GO:0055002	striated muscle cell development	-5.35202	-2.9713	7/62	58,88,844,3688,4633,8557,58529	ACTA1,ACTN2,CASQ1,ITGB1,MYL2,TCAP,MYOZ1
3_Member	GO Biological Processes	GO:0055001	muscle cell development	-5.09983	-2.78606	10/157	58,88,844,859,3688,4633,7422,8291,8557,58529	ACTA1,ACTN2,CASQ1,CAV3,ITGB1,MYL2,VEGFA,DYSF,TCAP,MYOZ1
3_Member	GO Biological Processes	GO:0051146	striated muscle cell differentiation	-5.0475	-2.7466	11/195	58,88,650,844,859,3688,4633,7422,7490,8557,58529	ACTA1,ACTN2,BMP2,CASQ1,CAV3,ITGB1,MYL2,VEGFA,WT1,TCAP,MYOZ1
3_Member	GO Biological Processes	GO:0031032	actomyosin structure organization	-4.60339	-2.4088	8/110	58,88,844,1264,3688,4633,8557,58529	ACTA1,ACTN2,CASQ1,CNN1,ITGB1,MYL2,TCAP,MYOZ1
3_Member	GO Biological Processes	GO:0035051	cardiocyte differentiation	-4.46393	-2.29816	8/115	88,650,859,3688,4633,7422,7490,8557	ACTN2,BMP2,CAV3,ITGB1,MYL2,VEGFA,WT1,TCAP
3_Member	GO Biological Processes	GO:0045214	sarcomere organization	-4.29335	-2.16748	5/38	88,844,3688,8557,58529	ACTN2,CASQ1,ITGB1,TCAP,MYOZ1
3_Member	GO Biological Processes	GO:0055013	cardiac muscle cell development	-3.30665	-1.43605	5/61	88,859,4633,7422,8557	ACTN2,CAV3,MYL2,VEGFA,TCAP
3_Member	GO Biological Processes	GO:0055006	cardiac cell development	-3.11887	-1.30861	5/67	88,859,4633,7422,8557	ACTN2,CAV3,MYL2,VEGFA,TCAP
3_Member	GO Biological Processes	GO:0140694	non-membrane-bounded organelle assembly	-2.70179	-1.00218	10/310	58,88,844,3688,3833,4633,6169,8557,51065,58529	ACTA1,ACTN2,CASQ1,ITGB1,KIFC1,MYL2,RPL38,TCAP,RPS27L,MYOZ1
4_Summary	GO Molecular Functions	GO:0050839	cell adhesion molecule binding	-11.5347	-7.70138	29/557	88,421,961,977,1006,1272,1281,1969,2023,3679,3688,3690,3898,3939,4240,4345,5794,6282,6376,6387,7060,8727,10457,10518,23075,55714,81624,114990,152330	ACTN2,ARVCF,CD47,CD151,CDH8,CNTN1,COL3A1,EPHA2,ENO1,ITGA7,ITGB1,ITGB3,LAD1,LDHA,MFGE8,CD200,PTPRH,S100A11,CX3CL1,CXCL12,THBS4,CTNNAL1,GPNMB,CIB2,SWAP70,TENM3,DIAPH3,VASN,CNTN4
4_Member	GO Molecular Functions	GO:0050839	cell adhesion molecule binding	-11.5347	-7.70138	29/557	88,421,961,977,1006,1272,1281,1969,2023,3679,3688,3690,3898,3939,4240,4345,5794,6282,6376,6387,7060,8727,10457,10518,23075,55714,81624,114990,152330	ACTN2,ARVCF,CD47,CD151,CDH8,CNTN1,COL3A1,EPHA2,ENO1,ITGA7,ITGB1,ITGB3,LAD1,LDHA,MFGE8,CD200,PTPRH,S100A11,CX3CL1,CXCL12,THBS4,CTNNAL1,GPNMB,CIB2,SWAP70,TENM3,DIAPH3,VASN,CNTN4
4_Member	GO Molecular Functions	GO:0045296	cadherin binding	-4.15876	-2.0922	13/333	421,1006,1969,2023,3688,3898,3939,5794,6282,8727,23075,81624,114990	ARVCF,CDH8,EPHA2,ENO1,ITGB1,LAD1,LDHA,PTPRH,S100A11,CTNNAL1,SWAP70,DIAPH3,VASN
5_Summary	GO Biological Processes	GO:0030029	actin filament-based process	-11.44	-7.70138	30/602	58,88,388,390,844,859,1264,1809,2620,3688,3753,3764,4633,6330,7114,7169,8557,8572,10083,10160,23075,27295,58529,81624,83543,129446,253260,254102,644150,102723475,7134,7137,8727,11346,22846,24145,26064,56062,79789,91977,1281,1303,1674,5033	ACTA1,ACTN2,RHOB,RND3,CASQ1,CAV3,CNN1,DPYSL3,GAS2,ITGB1,KCNE1,KCNJ8,MYL2,SCN4B,TMSB4X,TPM2,TCAP,PDLIM4,USH1C,FARP1,SWAP70,PDLIM3,MYOZ1,DIAPH3,AIF1L,XIRP2,RICTOR,EHBP1L1,WIPF3,LOC102723475,TNNC1,TNNI3,CTNNAL1,SYNPO,VASH1,PANX1,RAI14,KLHL4,CLMN,MYOZ3,COL3A1,COL12A1,DES,P4HA1
5_Member	GO Biological Processes	GO:0030029	actin filament-based process	-11.44	-7.70138	30/602	58,88,388,390,844,859,1264,1809,2620,3688,3753,3764,4633,6330,7114,7169,8557,8572,10083,10160,23075,27295,58529,81624,83543,129446,253260,254102,644150,102723475	ACTA1,ACTN2,RHOB,RND3,CASQ1,CAV3,CNN1,DPYSL3,GAS2,ITGB1,KCNE1,KCNJ8,MYL2,SCN4B,TMSB4X,TPM2,TCAP,PDLIM4,USH1C,FARP1,SWAP70,PDLIM3,MYOZ1,DIAPH3,AIF1L,XIRP2,RICTOR,EHBP1L1,WIPF3,LOC102723475
5_Member	GO Molecular Functions	GO:0003779	actin binding	-10.8358	-7.33948	25/439	88,1264,2620,3688,4633,7114,7134,7137,7169,8572,8727,10083,11346,22846,24145,26064,27295,56062,58529,79789,81624,83543,91977,129446,644150	ACTN2,CNN1,GAS2,ITGB1,MYL2,TMSB4X,TNNC1,TNNI3,TPM2,PDLIM4,CTNNAL1,USH1C,SYNPO,VASH1,PANX1,RAI14,PDLIM3,KLHL4,MYOZ1,CLMN,DIAPH3,AIF1L,MYOZ3,XIRP2,WIPF3
5_Member	GO Biological Processes	GO:0030036	actin cytoskeleton organization	-8.95141	-5.91173	25/540	58,88,388,390,844,859,1264,1809,2620,3688,4633,7114,7169,8557,8572,10083,10160,23075,27295,58529,81624,83543,129446,253260,254102	ACTA1,ACTN2,RHOB,RND3,CASQ1,CAV3,CNN1,DPYSL3,GAS2,ITGB1,MYL2,TMSB4X,TPM2,TCAP,PDLIM4,USH1C,FARP1,SWAP70,PDLIM3,MYOZ1,DIAPH3,AIF1L,XIRP2,RICTOR,EHBP1L1
5_Member	GO Biological Processes	GO:0097435	supramolecular fiber organization	-7.87682	-5.01898	23/522	58,88,388,390,844,859,1281,1303,1674,1809,2620,3688,4633,5033,7114,7169,8557,10083,23075,58529,81624,83543,129446	ACTA1,ACTN2,RHOB,RND3,CASQ1,CAV3,COL3A1,COL12A1,DES,DPYSL3,GAS2,ITGB1,MYL2,P4HA1,TMSB4X,TPM2,TCAP,USH1C,SWAP70,MYOZ1,DIAPH3,AIF1L,XIRP2
5_Member	GO Biological Processes	GO:0007015	actin filament organization	-5.88829	-3.36448	14/267	58,388,390,859,1809,2620,7114,7169,8557,10083,23075,81624,83543,129446	ACTA1,RHOB,RND3,CAV3,DPYSL3,GAS2,TMSB4X,TPM2,TCAP,USH1C,SWAP70,DIAPH3,AIF1L,XIRP2
5_Member	GO Molecular Functions	GO:0051015	actin filament binding	-4.66988	-2.45739	11/214	88,2620,7134,7137,7169,8727,10083,24145,79789,83543,129446	ACTN2,GAS2,TNNC1,TNNI3,TPM2,CTNNAL1,USH1C,PANX1,CLMN,AIF1L,XIRP2
6_Summary	GO Biological Processes	GO:2000147	positive regulation of cell motility	-11.0355	-7.376	29/584	306,388,650,728,961,977,1969,2043,3688,3690,5328,5606,6237,6282,6376,6387,6662,7060,7114,7422,9423,9806,10457,22800,23075,54437,58515,64115,284119,384,1843,1948,3485,5500,6281,6422,10272,27242,55714,151887,201294	ANXA3,RHOB,BMP2,C5AR1,CD47,CD151,EPHA2,EPHA4,ITGB1,ITGB3,PLAU,MAP2K3,RRAS,S100A11,CX3CL1,CXCL12,SOX9,THBS4,TMSB4X,VEGFA,NTN1,SPOCK2,GPNMB,RRAS2,SWAP70,SEMA5B,SELENOK,VSIR,CAVIN1,ARG2,DUSP1,EFNB2,IGFBP2,PPP1CB,S100A10,SFRP1,FSTL3,TNFRSF21,TENM3,CCDC80,UNC13D
6_Member	GO Biological Processes	GO:2000147	positive regulation of cell motility	-11.0355	-7.376	29/584	306,388,650,728,961,977,1969,2043,3688,3690,5328,5606,6237,6282,6376,6387,6662,7060,7114,7422,9423,9806,10457,22800,23075,54437,58515,64115,284119	ANXA3,RHOB,BMP2,C5AR1,CD47,CD151,EPHA2,EPHA4,ITGB1,ITGB3,PLAU,MAP2K3,RRAS,S100A11,CX3CL1,CXCL12,SOX9,THBS4,TMSB4X,VEGFA,NTN1,SPOCK2,GPNMB,RRAS2,SWAP70,SEMA5B,SELENOK,VSIR,CAVIN1
6_Member	GO Biological Processes	GO:0051272	positive regulation of cellular component movement	-10.8229	-7.33948	29/596	306,388,650,728,961,977,1969,2043,3688,3690,5328,5606,6237,6282,6376,6387,6662,7060,7114,7422,9423,9806,10457,22800,23075,54437,58515,64115,284119	ANXA3,RHOB,BMP2,C5AR1,CD47,CD151,EPHA2,EPHA4,ITGB1,ITGB3,PLAU,MAP2K3,RRAS,S100A11,CX3CL1,CXCL12,SOX9,THBS4,TMSB4X,VEGFA,NTN1,SPOCK2,GPNMB,RRAS2,SWAP70,SEMA5B,SELENOK,VSIR,CAVIN1
6_Member	GO Biological Processes	GO:0040017	positive regulation of locomotion	-10.7706	-7.33293	29/599	306,388,650,728,961,977,1969,2043,3688,3690,5328,5606,6237,6282,6376,6387,6662,7060,7114,7422,9423,9806,10457,22800,23075,54437,58515,64115,284119	ANXA3,RHOB,BMP2,C5AR1,CD47,CD151,EPHA2,EPHA4,ITGB1,ITGB3,PLAU,MAP2K3,RRAS,S100A11,CX3CL1,CXCL12,SOX9,THBS4,TMSB4X,VEGFA,NTN1,SPOCK2,GPNMB,RRAS2,SWAP70,SEMA5B,SELENOK,VSIR,CAVIN1
6_Member	GO Biological Processes	GO:0030335	positive regulation of cell migration	-9.31586	-6.22066	26/560	306,388,650,728,961,977,1969,2043,3688,3690,5328,5606,6237,6282,6376,6387,6662,7060,7114,7422,10457,22800,23075,54437,58515,64115	ANXA3,RHOB,BMP2,C5AR1,CD47,CD151,EPHA2,EPHA4,ITGB1,ITGB3,PLAU,MAP2K3,RRAS,S100A11,CX3CL1,CXCL12,SOX9,THBS4,TMSB4X,VEGFA,GPNMB,RRAS2,SWAP70,SEMA5B,SELENOK,VSIR
6_Member	GO Biological Processes	GO:0030155	regulation of cell adhesion	-7.19829	-4.43105	27/760	384,650,961,1843,1948,1969,2043,3485,5328,5500,6237,6281,6376,6387,6422,6662,7422,9806,10272,10457,23075,27242,55714,58515,64115,151887,201294	ARG2,BMP2,CD47,DUSP1,EFNB2,EPHA2,EPHA4,IGFBP2,PLAU,PPP1CB,RRAS,S100A10,CX3CL1,CXCL12,SFRP1,SOX9,VEGFA,SPOCK2,FSTL3,GPNMB,SWAP70,TNFRSF21,TENM3,SELENOK,VSIR,CCDC80,UNC13D
6_Member	GO Biological Processes	GO:0045785	positive regulation of cell adhesion	-4.53955	-2.3572	16/446	961,1948,2043,3485,6237,6281,6376,6387,6422,7422,9806,10272,58515,64115,151887,201294	CD47,EFNB2,EPHA4,IGFBP2,RRAS,S100A10,CX3CL1,CXCL12,SFRP1,VEGFA,SPOCK2,FSTL3,SELENOK,VSIR,CCDC80,UNC13D
7_Summary	GO Biological Processes	GO:0048729	tissue morphogenesis	-10.849	-7.33948	28/554	58,374,388,650,977,1281,1948,1969,2043,3688,3690,4633,5241,6422,6662,6781,7134,7137,7422,7490,8091,8557,9423,10116,64398,92344,129446,286204,3099,3664,8862,1054,5230,7357,10083,57110	ACTA1,AREG,RHOB,BMP2,CD151,COL3A1,EFNB2,EPHA2,EPHA4,ITGB1,ITGB3,MYL2,PGR,SFRP1,SOX9,STC1,TNNC1,TNNI3,VEGFA,WT1,HMGA2,TCAP,NTN1,FEM1B,PALS1,GORAB,XIRP2,CRB2,HK2,IRF6,APLN,CEBPG,PGK1,UGCG,USH1C,PLAAT1
7_Member	GO Biological Processes	GO:0048729	tissue morphogenesis	-10.849	-7.33948	28/554	58,374,388,650,977,1281,1948,1969,2043,3688,3690,4633,5241,6422,6662,6781,7134,7137,7422,7490,8091,8557,9423,10116,64398,92344,129446,286204	ACTA1,AREG,RHOB,BMP2,CD151,COL3A1,EFNB2,EPHA2,EPHA4,ITGB1,ITGB3,MYL2,PGR,SFRP1,SOX9,STC1,TNNC1,TNNI3,VEGFA,WT1,HMGA2,TCAP,NTN1,FEM1B,PALS1,GORAB,XIRP2,CRB2
7_Member	GO Biological Processes	GO:0002009	morphogenesis of an epithelium	-5.16564	-2.83523	17/443	374,388,650,977,1948,1969,2043,5241,6422,6662,7422,7490,8557,9423,10116,64398,92344	AREG,RHOB,BMP2,CD151,EFNB2,EPHA2,EPHA4,PGR,SFRP1,SOX9,VEGFA,WT1,TCAP,NTN1,FEM1B,PALS1,GORAB
7_Member	GO Biological Processes	GO:0030879	mammary gland development	-5.1313	-2.80762	9/123	374,1969,3099,3664,5241,6662,7422,8862,9423	AREG,EPHA2,HK2,IRF6,PGR,SOX9,VEGFA,APLN,NTN1
7_Member	GO Biological Processes	GO:0060562	epithelial tube morphogenesis	-4.51941	-2.34186	13/307	374,388,650,1948,1969,2043,5241,6422,6662,7422,7490,8557,9423	AREG,RHOB,BMP2,EFNB2,EPHA2,EPHA4,PGR,SFRP1,SOX9,VEGFA,WT1,TCAP,NTN1
7_Member	GO Biological Processes	GO:0061138	morphogenesis of a branching epithelium	-4.18053	-2.10886	9/162	374,650,1969,5241,6422,6662,7422,7490,10116	AREG,BMP2,EPHA2,PGR,SFRP1,SOX9,VEGFA,WT1,FEM1B
7_Member	GO Biological Processes	GO:0001763	morphogenesis of a branching structure	-4.00023	-1.96573	9/171	374,650,1969,5241,6422,6662,7422,7490,10116	AREG,BMP2,EPHA2,PGR,SFRP1,SOX9,VEGFA,WT1,FEM1B
7_Member	GO Biological Processes	GO:0022612	gland morphogenesis	-3.96258	-1.93826	7/101	374,1969,5241,6422,6662,9423,10116	AREG,EPHA2,PGR,SFRP1,SOX9,NTN1,FEM1B
7_Member	GO Biological Processes	GO:0048732	gland development	-3.91909	-1.89977	14/401	374,650,1054,1969,3099,3664,5241,6422,6662,7422,7490,8862,9423,10116	AREG,BMP2,CEBPG,EPHA2,HK2,IRF6,PGR,SFRP1,SOX9,VEGFA,WT1,APLN,NTN1,FEM1B
7_Member	GO Biological Processes	GO:0060603	mammary gland duct morphogenesis	-3.60793	-1.67175	4/29	374,1969,5241,9423	AREG,EPHA2,PGR,NTN1
7_Member	GO Biological Processes	GO:0061180	mammary gland epithelium development	-3.44408	-1.54133	5/57	374,1969,3664,5241,9423	AREG,EPHA2,IRF6,PGR,NTN1
7_Member	GO Biological Processes	GO:0048754	branching morphogenesis of an epithelial tube	-3.22924	-1.38045	7/133	374,650,1969,5241,6662,7422,7490	AREG,BMP2,EPHA2,PGR,SOX9,VEGFA,WT1
7_Member	GO Biological Processes	GO:0060443	mammary gland morphogenesis	-3.02189	-1.24513	4/41	374,1969,5241,9423	AREG,EPHA2,PGR,NTN1
7_Member	GO Biological Processes	GO:0060444	branching involved in mammary gland duct morphogenesis	-2.79488	-1.07824	3/22	374,1969,5241	AREG,EPHA2,PGR
7_Member	GO Biological Processes	GO:0001570	vasculogenesis	-2.19196	-0.630558	4/69	1969,7137,7422,7490	EPHA2,TNNI3,VEGFA,WT1
7_Member	GO Biological Processes	GO:0030855	epithelial cell differentiation	-2.17998	-0.621459	13/549	650,1969,3664,5230,5241,6662,6781,7357,7422,7490,10083,10116,57110	BMP2,EPHA2,IRF6,PGK1,PGR,SOX9,STC1,UGCG,VEGFA,WT1,USH1C,FEM1B,PLAAT1
8_Summary	Reactome Gene Sets	R-HSA-397014	Muscle contraction	-10.296	-6.93752	17/197	58,88,477,844,859,1674,3753,3761,3777,4633,4878,6330,7134,7137,7169,8291,8557,384,3764,5606,23336,102723475,58529,6445,1573,5999,6781,8862,84525,745,1264,2023,4879,27242,51196,6387,7422,100506658,6533,6566,1329,7388,23439,5500,650,1281,129446,2050,6662,23768,2743,10083	ACTA1,ACTN2,ATP1A2,CASQ1,CAV3,DES,KCNE1,KCNJ4,KCNK3,MYL2,NPPA,SCN4B,TNNC1,TNNI3,TPM2,DYSF,TCAP,ARG2,KCNJ8,MAP2K3,SYNM,LOC102723475,MYOZ1,SGCG,CYP2J2,RGS4,STC1,APLN,HOPX,MYRF,CNN1,ENO1,NPPB,TNFRSF21,PLCE1,CXCL12,VEGFA,OCLN,SLC6A6,SLC16A1,COX5B,UQCRH,ATP1B4,PPP1CB,BMP2,COL3A1,XIRP2,EPHB4,SOX9,FLRT2,GLRB,USH1C
8_Member	Reactome Gene Sets	R-HSA-397014	Muscle contraction	-10.296	-6.93752	17/197	58,88,477,844,859,1674,3753,3761,3777,4633,4878,6330,7134,7137,7169,8291,8557	ACTA1,ACTN2,ATP1A2,CASQ1,CAV3,DES,KCNE1,KCNJ4,KCNK3,MYL2,NPPA,SCN4B,TNNC1,TNNI3,TPM2,DYSF,TCAP
8_Member	GO Biological Processes	GO:0006941	striated muscle contraction	-9.91237	-6.65084	13/106	384,477,859,3753,3764,4633,5606,6330,7134,7137,8557,23336,102723475	ARG2,ATP1A2,CAV3,KCNE1,KCNJ8,MYL2,MAP2K3,SCN4B,TNNC1,TNNI3,TCAP,SYNM,LOC102723475
8_Member	GO Biological Processes	GO:0003012	muscle system process	-9.60462	-6.39744	19/281	58,88,384,477,859,1674,3753,3764,4633,4878,5606,6330,7134,7137,7169,8557,23336,58529,102723475	ACTA1,ACTN2,ARG2,ATP1A2,CAV3,DES,KCNE1,KCNJ8,MYL2,NPPA,MAP2K3,SCN4B,TNNC1,TNNI3,TPM2,TCAP,SYNM,MYOZ1,LOC102723475
8_Member	GO Biological Processes	GO:0060047	heart contraction	-9.5122	-6.32985	12/92	477,859,3753,3764,4633,5606,6330,6445,7134,7137,8557,102723475	ATP1A2,CAV3,KCNE1,KCNJ8,MYL2,MAP2K3,SCN4B,SGCG,TNNC1,TNNI3,TCAP,LOC102723475
8_Member	GO Biological Processes	GO:0006936	muscle contraction	-9.33289	-6.22066	17/227	58,88,384,477,859,1674,3753,3764,4633,5606,6330,7134,7137,7169,8557,23336,102723475	ACTA1,ACTN2,ARG2,ATP1A2,CAV3,DES,KCNE1,KCNJ8,MYL2,MAP2K3,SCN4B,TNNC1,TNNI3,TPM2,TCAP,SYNM,LOC102723475
8_Member	GO Biological Processes	GO:0060048	cardiac muscle contraction	-9.32868	-6.22066	11/75	477,859,3753,3764,4633,5606,6330,7134,7137,8557,102723475	ATP1A2,CAV3,KCNE1,KCNJ8,MYL2,MAP2K3,SCN4B,TNNC1,TNNI3,TCAP,LOC102723475
8_Member	GO Biological Processes	GO:0003015	heart process	-8.69271	-5.70224	12/108	477,859,3753,3764,4633,5606,6330,6445,7134,7137,8557,102723475	ATP1A2,CAV3,KCNE1,KCNJ8,MYL2,MAP2K3,SCN4B,SGCG,TNNC1,TNNI3,TCAP,LOC102723475
8_Member	Reactome Gene Sets	R-HSA-390522	Striated Muscle Contraction	-8.43749	-5.50502	8/36	58,88,1674,4633,7134,7137,7169,8557	ACTA1,ACTN2,DES,MYL2,TNNC1,TNNI3,TPM2,TCAP
8_Member	WikiPathways	WP383	Striated muscle contraction pathway	-8.23709	-5.34354	8/38	58,88,1674,4633,7134,7137,7169,8557	ACTA1,ACTN2,DES,MYL2,TNNC1,TNNI3,TPM2,TCAP
8_Member	GO Biological Processes	GO:0008016	regulation of heart contraction	-7.23147	-4.44705	14/207	477,859,1573,1674,3753,4633,4878,5999,6330,6781,7137,8862,84525,102723475	ATP1A2,CAV3,CYP2J2,DES,KCNE1,MYL2,NPPA,RGS4,SCN4B,STC1,TNNI3,APLN,HOPX,LOC102723475
8_Member	GO Biological Processes	GO:0044057	regulation of system process	-6.52388	-3.83444	22/573	477,745,844,859,1264,1573,1674,2023,3753,4633,4878,4879,5999,6330,6781,7134,7137,8862,27242,51196,84525,102723475	ATP1A2,MYRF,CASQ1,CAV3,CNN1,CYP2J2,DES,ENO1,KCNE1,MYL2,NPPA,NPPB,RGS4,SCN4B,STC1,TNNC1,TNNI3,APLN,TNFRSF21,PLCE1,HOPX,LOC102723475
8_Member	GO Biological Processes	GO:0008015	blood circulation	-6.41808	-3.75131	18/400	477,859,3753,3764,4633,4878,4879,5606,6330,6387,6445,7134,7137,7422,8557,8862,100506658,102723475	ATP1A2,CAV3,KCNE1,KCNJ8,MYL2,NPPA,NPPB,MAP2K3,SCN4B,CXCL12,SGCG,TNNC1,TNNI3,VEGFA,TCAP,APLN,OCLN,LOC102723475
8_Member	GO Biological Processes	GO:0003013	circulatory system process	-6.36565	-3.72737	20/492	477,859,3753,3764,4633,4878,4879,5606,6330,6387,6445,6533,6566,7134,7137,7422,8557,8862,100506658,102723475	ATP1A2,CAV3,KCNE1,KCNJ8,MYL2,NPPA,NPPB,MAP2K3,SCN4B,CXCL12,SGCG,SLC6A6,SLC16A1,TNNC1,TNNI3,VEGFA,TCAP,APLN,OCLN,LOC102723475
8_Member	GO Biological Processes	GO:1903522	regulation of blood circulation	-6.10505	-3.51893	14/256	477,859,1573,1674,3753,4633,4878,5999,6330,6781,7137,8862,84525,102723475	ATP1A2,CAV3,CYP2J2,DES,KCNE1,MYL2,NPPA,RGS4,SCN4B,STC1,TNNI3,APLN,HOPX,LOC102723475
8_Member	KEGG Pathway	hsa04260	Cardiac muscle contraction	-5.35697	-2.97243	8/87	477,1329,4633,7134,7137,7169,7388,23439	ATP1A2,COX5B,MYL2,TNNC1,TNNI3,TPM2,UQCRH,ATP1B4
8_Member	KEGG Pathway	hsa04261	Adrenergic signaling in cardiomyocytes	-5.27544	-2.91336	10/150	477,3753,4633,5500,6330,7134,7137,7169,23439,102723475	ATP1A2,KCNE1,MYL2,PPP1CB,SCN4B,TNNC1,TNNI3,TPM2,ATP1B4,LOC102723475
8_Member	GO Biological Processes	GO:0060415	muscle tissue morphogenesis	-4.8754	-2.61096	7/73	650,1281,4633,7134,7137,8557,129446	BMP2,COL3A1,MYL2,TNNC1,TNNI3,TCAP,XIRP2
8_Member	GO Biological Processes	GO:0048644	muscle organ morphogenesis	-4.61315	-2.41607	7/80	650,1281,4633,7134,7137,8557,129446	BMP2,COL3A1,MYL2,TNNC1,TNNI3,TCAP,XIRP2
8_Member	GO Biological Processes	GO:0055008	cardiac muscle tissue morphogenesis	-4.3573	-2.21634	6/60	650,4633,7134,7137,8557,129446	BMP2,MYL2,TNNC1,TNNI3,TCAP,XIRP2
8_Member	GO Molecular Functions	GO:0008307	structural constituent of muscle	-4.07942	-2.02382	5/42	88,4633,7169,8557,23336	ACTN2,MYL2,TPM2,TCAP,SYNM
8_Member	GO Biological Processes	GO:0003007	heart morphogenesis	-4.0577	-2.01278	11/250	650,859,2050,4633,6662,7134,7137,7422,8557,23768,129446	BMP2,CAV3,EPHB4,MYL2,SOX9,TNNC1,TNNI3,VEGFA,TCAP,FLRT2,XIRP2
8_Member	GO Biological Processes	GO:0003009	skeletal muscle contraction	-3.60793	-1.67175	4/29	7134,7137,8557,23336	TNNC1,TNNI3,TCAP,SYNM
8_Member	GO Biological Processes	GO:0050879	multicellular organismal movement	-2.98206	-1.21653	4/42	7134,7137,8557,23336	TNNC1,TNNI3,TCAP,SYNM
8_Member	GO Biological Processes	GO:0050881	musculoskeletal movement	-2.98206	-1.21653	4/42	7134,7137,8557,23336	TNNC1,TNNI3,TCAP,SYNM
8_Member	GO Biological Processes	GO:0003229	ventricular cardiac muscle tissue development	-2.51679	-0.875741	4/56	4633,7134,7137,84525	MYL2,TNNC1,TNNI3,HOPX
8_Member	GO Biological Processes	GO:0050905	neuromuscular process	-2.42378	-0.807666	6/138	2743,7134,7137,8557,10083,23336	GLRB,TNNC1,TNNI3,TCAP,USH1C,SYNM
8_Member	GO Biological Processes	GO:0003205	cardiac chamber development	-2.02903	-0.511445	6/167	650,859,4633,7134,7137,129446	BMP2,CAV3,MYL2,TNNC1,TNNI3,XIRP2
9_Summary	Hallmark Gene Sets	M5890	HALLMARK TNFA SIGNALING VIA NFKB	-10.1921	-6.86846	17/200	374,388,650,1316,1647,1843,5328,5606,5791,5971,7422,8553,22822,24145,24147,51278,56937	AREG,RHOB,BMP2,KLF6,GADD45A,DUSP1,PLAU,MAP2K3,PTPRE,RELB,VEGFA,BHLHE40,PHLDA1,PANX1,FJX1,IER5,PMEPA1
9_Member	Hallmark Gene Sets	M5890	HALLMARK TNFA SIGNALING VIA NFKB	-10.1921	-6.86846	17/200	374,388,650,1316,1647,1843,5328,5606,5791,5971,7422,8553,22822,24145,24147,51278,56937	AREG,RHOB,BMP2,KLF6,GADD45A,DUSP1,PLAU,MAP2K3,PTPRE,RELB,VEGFA,BHLHE40,PHLDA1,PANX1,FJX1,IER5,PMEPA1
10_Summary	GO Biological Processes	GO:0045765	regulation of angiogenesis	-8.90805	-5.8854	20/345	306,388,728,1647,1969,2752,3099,3688,4879,5230,5740,6237,6422,7060,7422,8091,10457,22846,23554,64102,3690,5606,5801,6662,6781,7114,58,374,961,1006,5328,6387,51196	ANXA3,RHOB,C5AR1,GADD45A,EPHA2,GLUL,HK2,ITGB1,NPPB,PGK1,PTGIS,RRAS,SFRP1,THBS4,VEGFA,HMGA2,GPNMB,VASH1,TSPAN12,TNMD,ITGB3,MAP2K3,PTPRR,SOX9,STC1,TMSB4X,ACTA1,AREG,CD47,CDH8,PLAU,CXCL12,PLCE1
10_Member	GO Biological Processes	GO:0045765	regulation of angiogenesis	-8.90805	-5.8854	20/345	306,388,728,1647,1969,2752,3099,3688,4879,5230,5740,6237,6422,7060,7422,8091,10457,22846,23554,64102	ANXA3,RHOB,C5AR1,GADD45A,EPHA2,GLUL,HK2,ITGB1,NPPB,PGK1,PTGIS,RRAS,SFRP1,THBS4,VEGFA,HMGA2,GPNMB,VASH1,TSPAN12,TNMD
10_Member	GO Biological Processes	GO:1901342	regulation of vasculature development	-8.77912	-5.77286	20/351	306,388,728,1647,1969,2752,3099,3688,4879,5230,5740,6237,6422,7060,7422,8091,10457,22846,23554,64102	ANXA3,RHOB,C5AR1,GADD45A,EPHA2,GLUL,HK2,ITGB1,NPPB,PGK1,PTGIS,RRAS,SFRP1,THBS4,VEGFA,HMGA2,GPNMB,VASH1,TSPAN12,TNMD
10_Member	GO Biological Processes	GO:0010632	regulation of epithelial cell migration	-5.4691	-3.0649	14/290	306,388,1647,1969,2752,3690,5606,5801,6237,6662,6781,7114,7422,22846	ANXA3,RHOB,GADD45A,EPHA2,GLUL,ITGB3,MAP2K3,PTPRR,RRAS,SOX9,STC1,TMSB4X,VEGFA,VASH1
10_Member	GO Biological Processes	GO:0010594	regulation of endothelial cell migration	-5.1079	-2.79085	12/230	306,388,1647,1969,2752,3690,5606,6237,6781,7114,7422,22846	ANXA3,RHOB,GADD45A,EPHA2,GLUL,ITGB3,MAP2K3,RRAS,STC1,TMSB4X,VEGFA,VASH1
10_Member	GO Biological Processes	GO:0045766	positive regulation of angiogenesis	-3.77729	-1.79451	9/183	306,388,728,3099,3688,5740,6237,7422,8091	ANXA3,RHOB,C5AR1,HK2,ITGB1,PTGIS,RRAS,VEGFA,HMGA2
10_Member	GO Biological Processes	GO:1904018	positive regulation of vasculature development	-3.77729	-1.79451	9/183	306,388,728,3099,3688,5740,6237,7422,8091	ANXA3,RHOB,C5AR1,HK2,ITGB1,PTGIS,RRAS,VEGFA,HMGA2
10_Member	GO Biological Processes	GO:0010595	positive regulation of endothelial cell migration	-3.26853	-1.41069	7/131	306,388,3690,5606,6237,7114,7422	ANXA3,RHOB,ITGB3,MAP2K3,RRAS,TMSB4X,VEGFA
10_Member	GO Biological Processes	GO:0010634	positive regulation of epithelial cell migration	-3.22326	-1.37559	8/174	306,388,3690,5606,6237,6662,7114,7422	ANXA3,RHOB,ITGB3,MAP2K3,RRAS,SOX9,TMSB4X,VEGFA
10_Member	WikiPathways	WP5087	Malignant pleural mesothelioma	-2.47071	-0.846003	12/447	58,374,961,1006,1969,3688,3690,5328,5606,6387,6422,7422	ACTA1,AREG,CD47,CDH8,EPHA2,ITGB1,ITGB3,PLAU,MAP2K3,CXCL12,SFRP1,VEGFA
10_Member	GO Biological Processes	GO:0043535	regulation of blood vessel endothelial cell migration	-2.24851	-0.670959	6/150	1647,1969,5606,7114,7422,22846	GADD45A,EPHA2,MAP2K3,TMSB4X,VEGFA,VASH1
10_Member	KEGG Pathway	hsa04015	Rap1 signaling pathway	-2.11525	-0.577451	7/210	1969,3688,3690,5606,6237,7422,51196	EPHA2,ITGB1,ITGB3,MAP2K3,RRAS,VEGFA,PLCE1
11_Summary	Canonical Pathways	M255	PID HIF1 TFPATHWAY	-8.67575	-5.70052	10/66	664,2023,3099,3939,5230,6095,6387,7422,8553,79365,3485,6566,3777,8091,114088	BNIP3,ENO1,HK2,LDHA,PGK1,RORA,CXCL12,VEGFA,BHLHE40,BHLHE41,IGFBP2,SLC16A1,KCNK3,HMGA2,TRIM9
11_Member	Canonical Pathways	M255	PID HIF1 TFPATHWAY	-8.67575	-5.70052	10/66	664,2023,3099,3939,5230,6095,6387,7422,8553,79365	BNIP3,ENO1,HK2,LDHA,PGK1,RORA,CXCL12,VEGFA,BHLHE40,BHLHE41
11_Member	WikiPathways	WP3614	Photodynamic therapy-induced HIF-1 survival signaling	-5.60082	-3.18023	6/37	664,3485,3939,5230,6566,7422	BNIP3,IGFBP2,LDHA,PGK1,SLC16A1,VEGFA
11_Member	Canonical Pathways	M44	PID HIF2PATHWAY	-2.24645	-0.670959	3/34	5230,7422,8553	PGK1,VEGFA,BHLHE40
11_Member	WikiPathways	WP5094	Orexin receptor pathway	-2.18072	-0.621459	6/155	3777,3939,7422,8091,8553,114088	KCNK3,LDHA,VEGFA,HMGA2,BHLHE40,TRIM9
12_Summary	GO Biological Processes	GO:0035239	tube morphogenesis	-8.45257	-5.50631	27/661	374,388,650,1281,1464,1948,1969,2043,2050,2752,3688,3690,4240,5241,5396,6095,6376,6422,6662,7137,7422,7490,8557,8862,9423,22846,23554,196,201294,977,1111,1164,3664,6781,8091,10763	AREG,RHOB,BMP2,COL3A1,CSPG4,EFNB2,EPHA2,EPHA4,EPHB4,GLUL,ITGB1,ITGB3,MFGE8,PGR,PRRX1,RORA,CX3CL1,SFRP1,SOX9,TNNI3,VEGFA,WT1,TCAP,APLN,NTN1,VASH1,TSPAN12,AHR,UNC13D,CD151,CHEK1,CKS2,IRF6,STC1,HMGA2,NES
12_Member	GO Biological Processes	GO:0035239	tube morphogenesis	-8.45257	-5.50631	27/661	374,388,650,1281,1464,1948,1969,2043,2050,2752,3688,3690,4240,5241,5396,6095,6376,6422,6662,7137,7422,7490,8557,8862,9423,22846,23554	AREG,RHOB,BMP2,COL3A1,CSPG4,EFNB2,EPHA2,EPHA4,EPHB4,GLUL,ITGB1,ITGB3,MFGE8,PGR,PRRX1,RORA,CX3CL1,SFRP1,SOX9,TNNI3,VEGFA,WT1,TCAP,APLN,NTN1,VASH1,TSPAN12
12_Member	GO Biological Processes	GO:0048514	blood vessel morphogenesis	-6.7942	-4.04677	19/419	388,1281,1464,1948,1969,2050,2752,3688,3690,4240,5396,6095,6376,7137,7422,7490,8862,22846,23554	RHOB,COL3A1,CSPG4,EFNB2,EPHA2,EPHB4,GLUL,ITGB1,ITGB3,MFGE8,PRRX1,RORA,CX3CL1,TNNI3,VEGFA,WT1,APLN,VASH1,TSPAN12
12_Member	GO Biological Processes	GO:0001944	vasculature development	-6.52775	-3.83444	21/526	196,388,1281,1464,1948,1969,2050,2752,3688,3690,4240,5396,6095,6376,7137,7422,7490,8862,22846,23554,201294	AHR,RHOB,COL3A1,CSPG4,EFNB2,EPHA2,EPHB4,GLUL,ITGB1,ITGB3,MFGE8,PRRX1,RORA,CX3CL1,TNNI3,VEGFA,WT1,APLN,VASH1,TSPAN12,UNC13D
12_Member	GO Biological Processes	GO:0001568	blood vessel development	-6.21579	-3.60424	20/503	196,388,1281,1464,1948,1969,2050,2752,3688,3690,4240,5396,6095,6376,7137,7422,7490,8862,22846,23554	AHR,RHOB,COL3A1,CSPG4,EFNB2,EPHA2,EPHB4,GLUL,ITGB1,ITGB3,MFGE8,PRRX1,RORA,CX3CL1,TNNI3,VEGFA,WT1,APLN,VASH1,TSPAN12
12_Member	GO Biological Processes	GO:0001525	angiogenesis	-5.6441	-3.21079	15/321	388,1464,1948,1969,2050,2752,3688,3690,4240,6095,6376,7422,8862,22846,23554	RHOB,CSPG4,EFNB2,EPHA2,EPHB4,GLUL,ITGB1,ITGB3,MFGE8,RORA,CX3CL1,VEGFA,APLN,VASH1,TSPAN12
12_Member	GO Biological Processes	GO:0008283	cell population proliferation	-4.068	-2.01954	16/489	374,650,977,1111,1164,1281,1464,1969,2752,3664,6095,6376,6662,6781,8091,10763	AREG,BMP2,CD151,CHEK1,CKS2,COL3A1,CSPG4,EPHA2,GLUL,IRF6,RORA,CX3CL1,SOX9,STC1,HMGA2,NES
13_Summary	Hallmark Gene Sets	M5947	HALLMARK IL2 STAT5 SIGNALING	-8.34205	-5.42294	15/199	196,388,650,1316,2027,3099,3664,5033,6095,7371,8553,22822,23075,27242,84525,1647,5740,83881	AHR,RHOB,BMP2,KLF6,ENO3,HK2,IRF6,P4HA1,RORA,UCK2,BHLHE40,PHLDA1,SWAP70,TNFRSF21,HOPX,GADD45A,PTGIS,MIXL1
13_Member	Hallmark Gene Sets	M5947	HALLMARK IL2 STAT5 SIGNALING	-8.34205	-5.42294	15/199	196,388,650,1316,2027,3099,3664,5033,6095,7371,8553,22822,23075,27242,84525	AHR,RHOB,BMP2,KLF6,ENO3,HK2,IRF6,P4HA1,RORA,UCK2,BHLHE40,PHLDA1,SWAP70,TNFRSF21,HOPX
13_Member	WikiPathways	WP236	Adipogenesis	-3.26853	-1.41069	7/131	196,650,1316,1647,5740,6095,83881	AHR,BMP2,KLF6,GADD45A,PTGIS,RORA,MIXL1
14_Summary	GO Biological Processes	GO:0032989	cellular component morphogenesis	-7.77545	-4.93988	24/573	58,88,844,1272,1948,1969,2043,2050,3688,4633,6387,7422,8128,8557,9423,10160,10678,10763,23768,54437,58529,64398,139065,152330,388,1281,1297,1809,3690,6169,6171,6237,6330,7277,7316,51065,728,5328,6376,10457,123920,27242,374,10083,79789,1006,6781,5396,6422,51196,55714,100506658	ACTA1,ACTN2,CASQ1,CNTN1,EFNB2,EPHA2,EPHA4,EPHB4,ITGB1,MYL2,CXCL12,VEGFA,ST8SIA2,TCAP,NTN1,FARP1,B3GNT2,NES,FLRT2,SEMA5B,MYOZ1,PALS1,SLITRK4,CNTN4,RHOB,COL3A1,COL9A1,DPYSL3,ITGB3,RPL38,RPL41,RRAS,SCN4B,TUBA4A,UBC,RPS27L,C5AR1,PLAU,CX3CL1,GPNMB,CMTM3,TNFRSF21,AREG,USH1C,CLMN,CDH8,STC1,PRRX1,SFRP1,PLCE1,TENM3,OCLN
14_Member	GO Biological Processes	GO:0032989	cellular component morphogenesis	-7.77545	-4.93988	24/573	58,88,844,1272,1948,1969,2043,2050,3688,4633,6387,7422,8128,8557,9423,10160,10678,10763,23768,54437,58529,64398,139065,152330	ACTA1,ACTN2,CASQ1,CNTN1,EFNB2,EPHA2,EPHA4,EPHB4,ITGB1,MYL2,CXCL12,VEGFA,ST8SIA2,TCAP,NTN1,FARP1,B3GNT2,NES,FLRT2,SEMA5B,MYOZ1,PALS1,SLITRK4,CNTN4
14_Member	Reactome Gene Sets	R-HSA-422475	Axon guidance	-6.18804	-3.58926	21/552	388,1272,1281,1297,1809,1948,1969,2043,2050,3688,3690,6169,6171,6237,6330,6387,7277,7316,8128,9423,51065	RHOB,CNTN1,COL3A1,COL9A1,DPYSL3,EFNB2,EPHA2,EPHA4,EPHB4,ITGB1,ITGB3,RPL38,RPL41,RRAS,SCN4B,CXCL12,TUBA4A,UBC,ST8SIA2,NTN1,RPS27L
14_Member	Reactome Gene Sets	R-HSA-9675108	Nervous system development	-5.88123	-3.36268	21/577	388,1272,1281,1297,1809,1948,1969,2043,2050,3688,3690,6169,6171,6237,6330,6387,7277,7316,8128,9423,51065	RHOB,CNTN1,COL3A1,COL9A1,DPYSL3,EFNB2,EPHA2,EPHA4,EPHB4,ITGB1,ITGB3,RPL38,RPL41,RRAS,SCN4B,CXCL12,TUBA4A,UBC,ST8SIA2,NTN1,RPS27L
14_Member	GO Biological Processes	GO:0007411	axon guidance	-5.16568	-2.83523	12/227	1272,1948,1969,2043,2050,6387,7422,9423,10678,23768,54437,152330	CNTN1,EFNB2,EPHA2,EPHA4,EPHB4,CXCL12,VEGFA,NTN1,B3GNT2,FLRT2,SEMA5B,CNTN4
14_Member	GO Biological Processes	GO:0097485	neuron projection guidance	-5.14632	-2.81928	12/228	1272,1948,1969,2043,2050,6387,7422,9423,10678,23768,54437,152330	CNTN1,EFNB2,EPHA2,EPHA4,EPHB4,CXCL12,VEGFA,NTN1,B3GNT2,FLRT2,SEMA5B,CNTN4
14_Member	GO Biological Processes	GO:0006935	chemotaxis	-4.98692	-2.69543	18/506	728,1272,1948,1969,2043,2050,3690,5328,6376,6387,7422,9423,10457,10678,23768,54437,123920,152330	C5AR1,CNTN1,EFNB2,EPHA2,EPHA4,EPHB4,ITGB3,PLAU,CX3CL1,CXCL12,VEGFA,NTN1,GPNMB,B3GNT2,FLRT2,SEMA5B,CMTM3,CNTN4
14_Member	GO Biological Processes	GO:0042330	taxis	-4.94099	-2.66173	18/510	728,1272,1948,1969,2043,2050,3690,5328,6376,6387,7422,9423,10457,10678,23768,54437,123920,152330	C5AR1,CNTN1,EFNB2,EPHA2,EPHA4,EPHB4,ITGB3,PLAU,CX3CL1,CXCL12,VEGFA,NTN1,GPNMB,B3GNT2,FLRT2,SEMA5B,CMTM3,CNTN4
14_Member	GO Biological Processes	GO:0048858	cell projection morphogenesis	-4.91702	-2.6492	17/463	1272,1948,1969,2043,2050,3688,6387,7422,8128,9423,10160,10678,10763,23768,54437,139065,152330	CNTN1,EFNB2,EPHA2,EPHA4,EPHB4,ITGB1,CXCL12,VEGFA,ST8SIA2,NTN1,FARP1,B3GNT2,NES,FLRT2,SEMA5B,SLITRK4,CNTN4
14_Member	GO Biological Processes	GO:0061564	axon development	-4.76717	-2.52339	15/380	1272,1948,1969,2043,2050,3688,6387,7422,9423,10678,23768,27242,54437,139065,152330	CNTN1,EFNB2,EPHA2,EPHA4,EPHB4,ITGB1,CXCL12,VEGFA,NTN1,B3GNT2,FLRT2,TNFRSF21,SEMA5B,SLITRK4,CNTN4
14_Member	GO Biological Processes	GO:0032990	cell part morphogenesis	-4.69404	-2.46593	17/482	1272,1948,1969,2043,2050,3688,6387,7422,8128,9423,10160,10678,10763,23768,54437,139065,152330	CNTN1,EFNB2,EPHA2,EPHA4,EPHB4,ITGB1,CXCL12,VEGFA,ST8SIA2,NTN1,FARP1,B3GNT2,NES,FLRT2,SEMA5B,SLITRK4,CNTN4
14_Member	GO Biological Processes	GO:0031175	neuron projection development	-4.66949	-2.45739	20/639	374,1272,1948,1969,2043,2050,3688,6387,7422,8128,9423,10083,10160,10678,23768,27242,54437,79789,139065,152330	AREG,CNTN1,EFNB2,EPHA2,EPHA4,EPHB4,ITGB1,CXCL12,VEGFA,ST8SIA2,NTN1,USH1C,FARP1,B3GNT2,FLRT2,TNFRSF21,SEMA5B,CLMN,SLITRK4,CNTN4
14_Member	GO Biological Processes	GO:0007409	axonogenesis	-4.66031	-2.45314	14/342	1272,1948,1969,2043,2050,3688,6387,7422,9423,10678,23768,54437,139065,152330	CNTN1,EFNB2,EPHA2,EPHA4,EPHB4,ITGB1,CXCL12,VEGFA,NTN1,B3GNT2,FLRT2,SEMA5B,SLITRK4,CNTN4
14_Member	GO Biological Processes	GO:0048812	neuron projection morphogenesis	-4.43574	-2.27458	16/455	1272,1948,1969,2043,2050,3688,6387,7422,8128,9423,10160,10678,23768,54437,139065,152330	CNTN1,EFNB2,EPHA2,EPHA4,EPHB4,ITGB1,CXCL12,VEGFA,ST8SIA2,NTN1,FARP1,B3GNT2,FLRT2,SEMA5B,SLITRK4,CNTN4
14_Member	GO Biological Processes	GO:0120039	plasma membrane bounded cell projection morphogenesis	-4.39052	-2.24069	16/459	1272,1948,1969,2043,2050,3688,6387,7422,8128,9423,10160,10678,23768,54437,139065,152330	CNTN1,EFNB2,EPHA2,EPHA4,EPHB4,ITGB1,CXCL12,VEGFA,ST8SIA2,NTN1,FARP1,B3GNT2,FLRT2,SEMA5B,SLITRK4,CNTN4
14_Member	GO Biological Processes	GO:0048667	cell morphogenesis involved in neuron differentiation	-4.37556	-2.23019	15/411	1272,1948,1969,2043,2050,3688,6387,7422,9423,10160,10678,23768,54437,139065,152330	CNTN1,EFNB2,EPHA2,EPHA4,EPHB4,ITGB1,CXCL12,VEGFA,NTN1,FARP1,B3GNT2,FLRT2,SEMA5B,SLITRK4,CNTN4
14_Member	GO Biological Processes	GO:0000902	cell morphogenesis	-4.35449	-2.21572	20/673	1006,1272,1948,1969,2043,2050,3688,3690,6387,6781,7422,8128,9423,10160,10678,10763,23768,54437,139065,152330	CDH8,CNTN1,EFNB2,EPHA2,EPHA4,EPHB4,ITGB1,ITGB3,CXCL12,STC1,VEGFA,ST8SIA2,NTN1,FARP1,B3GNT2,NES,FLRT2,SEMA5B,SLITRK4,CNTN4
14_Member	GO Biological Processes	GO:0000904	cell morphogenesis involved in differentiation	-4.26226	-2.15097	17/522	1272,1948,1969,2043,2050,3688,3690,6387,6781,7422,9423,10160,10678,23768,54437,139065,152330	CNTN1,EFNB2,EPHA2,EPHA4,EPHB4,ITGB1,ITGB3,CXCL12,STC1,VEGFA,NTN1,FARP1,B3GNT2,FLRT2,SEMA5B,SLITRK4,CNTN4
14_Member	KEGG Pathway	hsa04360	Axon guidance	-3.79516	-1.80314	9/182	1948,1969,2043,2050,3688,6237,6387,9423,54437	EFNB2,EPHA2,EPHA4,EPHB4,ITGB1,RRAS,CXCL12,NTN1,SEMA5B
14_Member	GO Biological Processes	GO:0120035	regulation of plasma membrane bounded cell projection organization	-2.92388	-1.17117	16/622	1272,1809,1948,1969,2043,5396,6376,6387,6422,7422,9423,10083,51196,54437,55714,100506658	CNTN1,DPYSL3,EFNB2,EPHA2,EPHA4,PRRX1,CX3CL1,CXCL12,SFRP1,VEGFA,NTN1,USH1C,PLCE1,SEMA5B,TENM3,OCLN
14_Member	GO Biological Processes	GO:0031344	regulation of cell projection organization	-2.80447	-1.08452	16/639	1272,1809,1948,1969,2043,5396,6376,6387,6422,7422,9423,10083,51196,54437,55714,100506658	CNTN1,DPYSL3,EFNB2,EPHA2,EPHA4,PRRX1,CX3CL1,CXCL12,SFRP1,VEGFA,NTN1,USH1C,PLCE1,SEMA5B,TENM3,OCLN
14_Member	GO Biological Processes	GO:0010975	regulation of neuron projection development	-2.59806	-0.932755	12/431	1272,1809,1948,2043,5396,6376,6387,6422,7422,9423,54437,55714	CNTN1,DPYSL3,EFNB2,EPHA4,PRRX1,CX3CL1,CXCL12,SFRP1,VEGFA,NTN1,SEMA5B,TENM3
14_Member	GO Biological Processes	GO:0031346	positive regulation of cell projection organization	-2.40661	-0.792459	10/341	1272,1809,2043,6376,6387,7422,9423,51196,55714,100506658	CNTN1,DPYSL3,EPHA4,CX3CL1,CXCL12,VEGFA,NTN1,PLCE1,TENM3,OCLN
15_Summary	GO Molecular Functions	GO:0051373	FATZ binding	-7.19658	-4.43105	4/5	88,8557,58529,91977,3753	ACTN2,TCAP,MYOZ1,MYOZ3,KCNE1
15_Member	GO Molecular Functions	GO:0051373	FATZ binding	-7.19658	-4.43105	4/5	88,8557,58529,91977	ACTN2,TCAP,MYOZ1,MYOZ3
15_Member	GO Molecular Functions	GO:0031433	telethonin binding	-4.38667	-2.23908	3/7	3753,58529,91977	KCNE1,MYOZ1,MYOZ3
16_Summary	GO Molecular Functions	GO:0005178	integrin binding	-6.88774	-4.13135	12/156	88,977,1281,3679,3688,3690,4240,6376,6387,7060,10457,10518,1674,4633,6445,7134,7137,7169,27231,859,967,5328,5500,6237,7422,22800,51196,54776,7114,81624,961,4345,1297,22987,1464,54829,9672,9806,1969,6169,8091,286204,477,1948,9074,1006,92421,6566,9123,5606,650,1272,6330,7277	ACTN2,CD151,COL3A1,ITGA7,ITGB1,ITGB3,MFGE8,CX3CL1,CXCL12,THBS4,GPNMB,CIB2,DES,MYL2,SGCG,TNNC1,TNNI3,TPM2,NMRK2,CAV3,CD63,PLAU,PPP1CB,RRAS,VEGFA,RRAS2,PLCE1,PPP1R12C,TMSB4X,DIAPH3,CD47,CD200,COL9A1,SV2C,CSPG4,ASPN,SDC3,SPOCK2,EPHA2,RPL38,HMGA2,CRB2,ATP1A2,EFNB2,CLDN6,CDH8,CHMP4C,SLC16A1,SLC16A3,MAP2K3,BMP2,CNTN1,SCN4B,TUBA4A
16_Member	GO Molecular Functions	GO:0005178	integrin binding	-6.88774	-4.13135	12/156	88,977,1281,3679,3688,3690,4240,6376,6387,7060,10457,10518	ACTN2,CD151,COL3A1,ITGA7,ITGB1,ITGB3,MFGE8,CX3CL1,CXCL12,THBS4,GPNMB,CIB2
16_Member	KEGG Pathway	hsa05410	Hypertrophic cardiomyopathy	-6.26781	-3.6431	9/90	1674,3679,3688,3690,4633,6445,7134,7137,7169	DES,ITGA7,ITGB1,ITGB3,MYL2,SGCG,TNNC1,TNNI3,TPM2
16_Member	KEGG Pathway	hsa05414	Dilated cardiomyopathy	-6.02833	-3.47152	9/96	1674,3679,3688,3690,4633,6445,7134,7137,7169	DES,ITGA7,ITGB1,ITGB3,MYL2,SGCG,TNNC1,TNNI3,TPM2
16_Member	CORUM	CORUM:2395	ITGA7-ITGB1-CD151 complex	-5.91689	-3.38235	3/3	977,3679,3688	CD151,ITGA7,ITGB1
16_Member	CORUM	CORUM:2397	ITGA7-ITGB1-ITGB1BP3 complex	-5.91689	-3.38235	3/3	3679,3688,27231	ITGA7,ITGB1,NMRK2
16_Member	KEGG Pathway	hsa05205	Proteoglycans in cancer	-4.84336	-2.58471	11/205	859,967,3688,3690,5328,5500,6237,7422,22800,51196,54776	CAV3,CD63,ITGB1,ITGB3,PLAU,PPP1CB,RRAS,VEGFA,RRAS2,PLCE1,PPP1R12C
16_Member	KEGG Pathway	hsa04810	Regulation of actin cytoskeleton	-4.59566	-2.40601	11/218	3679,3688,3690,4633,5500,6237,6387,7114,22800,54776,81624	ITGA7,ITGB1,ITGB3,MYL2,PPP1CB,RRAS,CXCL12,TMSB4X,RRAS2,PPP1R12C,DIAPH3
16_Member	GO Biological Processes	GO:0034113	heterotypic cell-cell adhesion	-4.41007	-2.258	5/36	961,3679,3688,3690,4345	CD47,ITGA7,ITGB1,ITGB3,CD200
16_Member	KEGG Pathway	hsa04512	ECM-receptor interaction	-4.3441	-2.20751	7/88	961,1297,3679,3688,3690,7060,22987	CD47,COL9A1,ITGA7,ITGB1,ITGB3,THBS4,SV2C
16_Member	KEGG Pathway	hsa04510	Focal adhesion	-4.17767	-2.10886	10/201	859,1297,3679,3688,3690,4633,5500,7060,7422,54776	CAV3,COL9A1,ITGA7,ITGB1,ITGB3,MYL2,PPP1CB,THBS4,VEGFA,PPP1R12C
16_Member	Canonical Pathways	M18	PID INTEGRIN1 PATHWAY	-4.12178	-2.0589	6/66	1281,1464,3679,3688,5328,7422	COL3A1,CSPG4,ITGA7,ITGB1,PLAU,VEGFA
16_Member	Reactome Gene Sets	R-HSA-3000178	ECM proteoglycans	-3.77927	-1.79451	6/76	1281,1297,3679,3688,3690,54829	COL3A1,COL9A1,ITGA7,ITGB1,ITGB3,ASPN
16_Member	WikiPathways	WP2118	Arrhythmogenic right ventricular cardiomyopathy	-3.77927	-1.79451	6/76	88,1674,3679,3688,3690,6445	ACTN2,DES,ITGA7,ITGB1,ITGB3,SGCG
16_Member	KEGG Pathway	hsa05412	Arrhythmogenic right ventricular cardiomyopathy	-3.74791	-1.76968	6/77	88,1674,3679,3688,3690,6445	ACTN2,DES,ITGA7,ITGB1,ITGB3,SGCG
16_Member	Reactome Gene Sets	R-HSA-3000170	Syndecan interactions	-3.73202	-1.76074	4/27	1281,3688,3690,9672	COL3A1,ITGB1,ITGB3,SDC3
16_Member	GO Molecular Functions	GO:0050840	extracellular matrix binding	-3.517	-1.59789	5/55	3679,3688,3690,7422,9806	ITGA7,ITGB1,ITGB3,VEGFA,SPOCK2
16_Member	Reactome Gene Sets	R-HSA-216083	Integrin cell surface interactions	-3.51299	-1.59519	6/85	961,1281,1297,3679,3688,3690	CD47,COL3A1,COL9A1,ITGA7,ITGB1,ITGB3
16_Member	WikiPathways	WP306	Focal adhesion	-3.45933	-1.55086	9/202	859,3679,3688,3690,4633,5500,7060,7422,54776	CAV3,ITGA7,ITGB1,ITGB3,MYL2,PPP1CB,THBS4,VEGFA,PPP1R12C
16_Member	GO Biological Processes	GO:0007498	mesoderm development	-3.43334	-1.53605	7/123	1969,3688,3690,6169,7422,8091,286204	EPHA2,ITGB1,ITGB3,RPL38,VEGFA,HMGA2,CRB2
16_Member	GO Biological Processes	GO:0051580	regulation of neurotransmitter uptake	-3.13272	-1.31834	3/17	477,3688,3690	ATP1A2,ITGB1,ITGB3
16_Member	GO Biological Processes	GO:0001707	mesoderm formation	-3.08947	-1.28834	5/68	1969,3688,3690,8091,286204	EPHA2,ITGB1,ITGB3,HMGA2,CRB2
16_Member	GO Biological Processes	GO:0048332	mesoderm morphogenesis	-3.03216	-1.24967	5/70	1969,3688,3690,8091,286204	EPHA2,ITGB1,ITGB3,HMGA2,CRB2
16_Member	GO Molecular Functions	GO:0001618	virus receptor activity	-2.87105	-1.13612	5/76	1948,1969,3688,3690,9074	EFNB2,EPHA2,ITGB1,ITGB3,CLDN6
16_Member	GO Molecular Functions	GO:0140272	exogenous protein binding	-2.84566	-1.12068	5/77	1948,1969,3688,3690,9074	EFNB2,EPHA2,ITGB1,ITGB3,CLDN6
16_Member	WikiPathways	WP4541	Hippo-Merlin signaling dysregulation	-2.67202	-0.984132	6/123	1006,1969,3679,3688,3690,5500	CDH8,EPHA2,ITGA7,ITGB1,ITGB3,PPP1CB
16_Member	GO Biological Processes	GO:0048333	mesodermal cell differentiation	-2.58114	-0.92239	3/26	3688,3690,8091	ITGB1,ITGB3,HMGA2
16_Member	Canonical Pathways	M47	PID INTEGRIN CS PATHWAY	-2.58114	-0.92239	3/26	3679,3688,3690	ITGA7,ITGB1,ITGB3
16_Member	GO Biological Processes	GO:0007160	cell-matrix adhesion	-2.51883	-0.875741	6/132	88,967,1281,3679,3688,3690	ACTN2,CD63,COL3A1,ITGA7,ITGB1,ITGB3
16_Member	GO Biological Processes	GO:0052126	movement in host environment	-2.50261	-0.865704	6/133	1948,1969,3688,3690,9074,92421	EFNB2,EPHA2,ITGB1,ITGB3,CLDN6,CHMP4C
16_Member	GO Biological Processes	GO:0007229	integrin-mediated signaling pathway	-2.48567	-0.858277	5/93	961,1281,3679,3688,3690	CD47,COL3A1,ITGA7,ITGB1,ITGB3
16_Member	Reactome Gene Sets	R-HSA-202733	Cell surface interactions at the vascular wall	-2.43925	-0.820514	6/137	961,3688,3690,6566,9123,9672	CD47,ITGB1,ITGB3,SLC16A1,SLC16A3,SDC3
16_Member	Reactome Gene Sets	R-HSA-3000171	Non-integrin membrane-ECM interactions	-2.43452	-0.817096	4/59	1281,3688,3690,9672	COL3A1,ITGB1,ITGB3,SDC3
16_Member	GO Biological Processes	GO:0051701	biological process involved in interaction with host	-2.29061	-0.6987	6/147	1948,1969,3688,3690,9074,92421	EFNB2,EPHA2,ITGB1,ITGB3,CLDN6,CHMP4C
16_Member	GO Biological Processes	GO:0046718	viral entry into host cell	-2.27894	-0.694408	5/104	1948,1969,3688,3690,9074	EFNB2,EPHA2,ITGB1,ITGB3,CLDN6
16_Member	WikiPathways	WP185	Integrin-mediated cell adhesion	-2.27894	-0.694408	5/104	859,3679,3688,3690,5606	CAV3,ITGA7,ITGB1,ITGB3,MAP2K3
16_Member	GO Biological Processes	GO:0044409	entry into host	-2.24423	-0.669931	5/106	1948,1969,3688,3690,9074	EFNB2,EPHA2,ITGB1,ITGB3,CLDN6
16_Member	Reactome Gene Sets	R-HSA-2129379	Molecules associated with elastic fibres	-2.11093	-0.575305	3/38	650,3688,3690	BMP2,ITGB1,ITGB3
16_Member	GO Biological Processes	GO:0033627	cell adhesion mediated by integrin	-2.07956	-0.551497	3/39	3679,3688,3690	ITGA7,ITGB1,ITGB3
16_Member	Reactome Gene Sets	R-HSA-373760	L1CAM interactions	-2.03683	-0.517238	5/119	1272,3688,3690,6330,7277	CNTN1,ITGB1,ITGB3,SCN4B,TUBA4A
17_Summary	GO Biological Processes	GO:0001666	response to hypoxia	-6.50524	-3.82349	15/274	650,664,859,3099,3777,5230,5328,5740,6095,6387,6422,6781,7422,26355,114990	BMP2,BNIP3,CAV3,HK2,KCNK3,PGK1,PLAU,PTGIS,RORA,CXCL12,SFRP1,STC1,VEGFA,FAM162A,VASN
17_Member	GO Biological Processes	GO:0001666	response to hypoxia	-6.50524	-3.82349	15/274	650,664,859,3099,3777,5230,5328,5740,6095,6387,6422,6781,7422,26355,114990	BMP2,BNIP3,CAV3,HK2,KCNK3,PGK1,PLAU,PTGIS,RORA,CXCL12,SFRP1,STC1,VEGFA,FAM162A,VASN
17_Member	GO Biological Processes	GO:0036293	response to decreased oxygen levels	-6.24952	-3.63144	15/287	650,664,859,3099,3777,5230,5328,5740,6095,6387,6422,6781,7422,26355,114990	BMP2,BNIP3,CAV3,HK2,KCNK3,PGK1,PLAU,PTGIS,RORA,CXCL12,SFRP1,STC1,VEGFA,FAM162A,VASN
17_Member	GO Biological Processes	GO:0071456	cellular response to hypoxia	-5.86699	-3.35878	10/129	664,3777,5230,5740,6095,6422,6781,7422,26355,114990	BNIP3,KCNK3,PGK1,PTGIS,RORA,SFRP1,STC1,VEGFA,FAM162A,VASN
17_Member	GO Biological Processes	GO:0070482	response to oxygen levels	-5.84812	-3.3574	15/309	650,664,859,3099,3777,5230,5328,5740,6095,6387,6422,6781,7422,26355,114990	BMP2,BNIP3,CAV3,HK2,KCNK3,PGK1,PLAU,PTGIS,RORA,CXCL12,SFRP1,STC1,VEGFA,FAM162A,VASN
17_Member	GO Biological Processes	GO:0036294	cellular response to decreased oxygen levels	-5.62905	-3.20002	10/137	664,3777,5230,5740,6095,6422,6781,7422,26355,114990	BNIP3,KCNK3,PGK1,PTGIS,RORA,SFRP1,STC1,VEGFA,FAM162A,VASN
17_Member	GO Biological Processes	GO:0071453	cellular response to oxygen levels	-5.22428	-2.88357	10/152	664,3777,5230,5740,6095,6422,6781,7422,26355,114990	BNIP3,KCNK3,PGK1,PTGIS,RORA,SFRP1,STC1,VEGFA,FAM162A,VASN
18_Summary	WikiPathways	WP3888	VEGFA-VEGFR2 signaling pathway	-6.48467	-3.81047	19/439	650,1969,3688,3690,3939,4633,5230,5328,5606,7114,7422,8821,8974,23597,24147,51278,79094,253260,100506658	BMP2,EPHA2,ITGB1,ITGB3,LDHA,MYL2,PGK1,PLAU,MAP2K3,TMSB4X,VEGFA,INPP4B,P4HA2,ACOT9,FJX1,IER5,CHAC1,RICTOR,OCLN
18_Member	WikiPathways	WP3888	VEGFA-VEGFR2 signaling pathway	-6.48467	-3.81047	19/439	650,1969,3688,3690,3939,4633,5230,5328,5606,7114,7422,8821,8974,23597,24147,51278,79094,253260,100506658	BMP2,EPHA2,ITGB1,ITGB3,LDHA,MYL2,PGK1,PLAU,MAP2K3,TMSB4X,VEGFA,INPP4B,P4HA2,ACOT9,FJX1,IER5,CHAC1,RICTOR,OCLN
19_Summary	GO Molecular Functions	GO:0042803	protein homodimerization activity	-6.40438	-3.74491	24/680	196,224,664,1647,2023,4281,5648,6281,6282,7134,7164,7167,7169,7422,8553,8572,10518,23255,55714,79365,79953,83881,92421,114088,477,3688,51504	AHR,ALDH3A2,BNIP3,GADD45A,ENO1,MID1,MASP1,S100A10,S100A11,TNNC1,TPD52L1,TPI1,TPM2,VEGFA,BHLHE40,PDLIM4,CIB2,MTCL1,TENM3,BHLHE41,SYNDIG1,MIXL1,CHMP4C,TRIM9,ATP1A2,ITGB1,TRMT112
19_Member	GO Molecular Functions	GO:0042803	protein homodimerization activity	-6.40438	-3.74491	24/680	196,224,664,1647,2023,4281,5648,6281,6282,7134,7164,7167,7169,7422,8553,8572,10518,23255,55714,79365,79953,83881,92421,114088	AHR,ALDH3A2,BNIP3,GADD45A,ENO1,MID1,MASP1,S100A10,S100A11,TNNC1,TPD52L1,TPI1,TPM2,VEGFA,BHLHE40,PDLIM4,CIB2,MTCL1,TENM3,BHLHE41,SYNDIG1,MIXL1,CHMP4C,TRIM9
19_Member	GO Molecular Functions	GO:0046982	protein heterodimerization activity	-2.0129	-0.500075	9/331	196,477,1647,3688,7169,8553,51504,55714,79365	AHR,ATP1A2,GADD45A,ITGB1,TPM2,BHLHE40,TRMT112,TENM3,BHLHE41
20_Summary	GO Biological Processes	GO:1901379	regulation of potassium ion transmembrane transport	-6.06702	-3.49863	9/95	88,859,967,2273,3688,3753,4878,5999,102723475,6281,6330,8557,24145,140730,477,844,3099,3749,3761,3764,6376,7114,8682,51582,100506658,1272,3690,4129,6387,6781,3777,7137,1329,2743,6533,7388,9016,23439,55002,55244,83862,89872,121601,664,644150	ACTN2,CAV3,CD63,FHL1,ITGB1,KCNE1,NPPA,RGS4,LOC102723475,S100A10,SCN4B,TCAP,PANX1,RIMS4,ATP1A2,CASQ1,HK2,KCNC4,KCNJ4,KCNJ8,CX3CL1,TMSB4X,PEA15,AZIN1,OCLN,CNTN1,ITGB3,MAOB,CXCL12,STC1,KCNK3,TNNI3,COX5B,GLRB,SLC6A6,UQCRH,SLC25A14,ATP1B4,TMCO3,SLC47A1,TMEM120A,AQP10,ANO4,BNIP3,WIPF3
20_Member	GO Biological Processes	GO:1901379	regulation of potassium ion transmembrane transport	-6.06702	-3.49863	9/95	88,859,967,2273,3688,3753,4878,5999,102723475	ACTN2,CAV3,CD63,FHL1,ITGB1,KCNE1,NPPA,RGS4,LOC102723475
20_Member	GO Molecular Functions	GO:0044325	transmembrane transporter binding	-5.92919	-3.38366	10/127	88,859,2273,3753,6281,6330,8557,24145,140730,102723475	ACTN2,CAV3,FHL1,KCNE1,S100A10,SCN4B,TCAP,PANX1,RIMS4,LOC102723475
20_Member	GO Biological Processes	GO:0034762	regulation of transmembrane transport	-5.84564	-3.3574	21/580	88,477,844,859,967,2273,3099,3688,3749,3753,3761,3764,4878,5999,6330,6376,7114,8682,51582,100506658,102723475	ACTN2,ATP1A2,CASQ1,CAV3,CD63,FHL1,HK2,ITGB1,KCNC4,KCNE1,KCNJ4,KCNJ8,NPPA,RGS4,SCN4B,CX3CL1,TMSB4X,PEA15,AZIN1,OCLN,LOC102723475
20_Member	GO Biological Processes	GO:0043266	regulation of potassium ion transport	-5.53106	-3.11874	9/110	88,859,967,2273,3688,3753,4878,5999,102723475	ACTN2,CAV3,CD63,FHL1,ITGB1,KCNE1,NPPA,RGS4,LOC102723475
20_Member	GO Biological Processes	GO:0043269	regulation of ion transport	-5.25706	-2.90579	22/685	88,477,844,859,967,1272,2273,3688,3690,3749,3753,3761,3764,4129,4878,5999,6330,6376,6387,6781,7114,102723475	ACTN2,ATP1A2,CASQ1,CAV3,CD63,CNTN1,FHL1,ITGB1,ITGB3,KCNC4,KCNE1,KCNJ4,KCNJ8,MAOB,NPPA,RGS4,SCN4B,CX3CL1,CXCL12,STC1,TMSB4X,LOC102723475
20_Member	GO Biological Processes	GO:1901016	regulation of potassium ion transmembrane transporter activity	-5.12429	-2.80394	7/67	88,859,2273,3688,3753,4878,102723475	ACTN2,CAV3,FHL1,ITGB1,KCNE1,NPPA,LOC102723475
20_Member	GO Biological Processes	GO:0010959	regulation of metal ion transport	-5.07808	-2.76756	16/403	88,477,844,859,967,1272,2273,3688,3753,4878,5999,6330,6376,6387,6781,102723475	ACTN2,ATP1A2,CASQ1,CAV3,CD63,CNTN1,FHL1,ITGB1,KCNE1,NPPA,RGS4,SCN4B,CX3CL1,CXCL12,STC1,LOC102723475
20_Member	GO Biological Processes	GO:0086001	cardiac muscle cell action potential	-4.86838	-2.60685	6/49	477,859,3753,3764,6330,102723475	ATP1A2,CAV3,KCNE1,KCNJ8,SCN4B,LOC102723475
20_Member	GO Biological Processes	GO:0099623	regulation of cardiac muscle cell membrane repolarization	-4.80975	-2.55965	5/30	859,3753,4878,6330,102723475	CAV3,KCNE1,NPPA,SCN4B,LOC102723475
20_Member	GO Biological Processes	GO:0034765	regulation of ion transmembrane transport	-4.68264	-2.45986	17/483	88,477,844,859,967,2273,3688,3749,3753,3761,3764,4878,5999,6330,6376,7114,102723475	ACTN2,ATP1A2,CASQ1,CAV3,CD63,FHL1,ITGB1,KCNC4,KCNE1,KCNJ4,KCNJ8,NPPA,RGS4,SCN4B,CX3CL1,TMSB4X,LOC102723475
20_Member	GO Biological Processes	GO:1901380	negative regulation of potassium ion transmembrane transport	-4.66719	-2.45739	5/32	88,859,3753,5999,102723475	ACTN2,CAV3,KCNE1,RGS4,LOC102723475
20_Member	GO Biological Processes	GO:1904062	regulation of cation transmembrane transport	-4.50964	-2.33447	14/353	88,477,844,859,967,2273,3688,3753,4878,5999,6330,6376,7114,102723475	ACTN2,ATP1A2,CASQ1,CAV3,CD63,FHL1,ITGB1,KCNE1,NPPA,RGS4,SCN4B,CX3CL1,TMSB4X,LOC102723475
20_Member	GO Biological Processes	GO:0043270	positive regulation of ion transport	-4.37123	-2.22808	12/273	88,844,1272,2273,3688,3753,4878,6330,6376,6387,6781,7114	ACTN2,CASQ1,CNTN1,FHL1,ITGB1,KCNE1,NPPA,SCN4B,CX3CL1,CXCL12,STC1,TMSB4X
20_Member	GO Biological Processes	GO:0086002	cardiac muscle cell action potential involved in contraction	-4.29335	-2.16748	5/38	859,3753,3764,6330,102723475	CAV3,KCNE1,KCNJ8,SCN4B,LOC102723475
20_Member	GO Biological Processes	GO:0043267	negative regulation of potassium ion transport	-4.23756	-2.13727	5/39	88,859,3753,5999,102723475	ACTN2,CAV3,KCNE1,RGS4,LOC102723475
20_Member	GO Biological Processes	GO:0060306	regulation of membrane repolarization	-4.23756	-2.13727	5/39	859,3753,4878,6330,102723475	CAV3,KCNE1,NPPA,SCN4B,LOC102723475
20_Member	GO Biological Processes	GO:0086005	ventricular cardiac muscle cell action potential	-4.17727	-2.10886	4/21	859,3753,3764,102723475	CAV3,KCNE1,KCNJ8,LOC102723475
20_Member	Reactome Gene Sets	R-HSA-5576891	Cardiac conduction	-4.10882	-2.04777	8/129	477,844,3753,3761,3777,4878,6330,7137	ATP1A2,CASQ1,KCNE1,KCNJ4,KCNK3,NPPA,SCN4B,TNNI3
20_Member	GO Biological Processes	GO:0086003	cardiac muscle cell contraction	-4.02953	-1.98985	5/43	859,3753,3764,6330,102723475	CAV3,KCNE1,KCNJ8,SCN4B,LOC102723475
20_Member	GO Biological Processes	GO:0060307	regulation of ventricular cardiac muscle cell membrane repolarization	-3.86689	-1.86384	4/25	859,3753,6330,102723475	CAV3,KCNE1,SCN4B,LOC102723475
20_Member	GO Biological Processes	GO:0086009	membrane repolarization	-3.86689	-1.86384	4/25	477,3753,3764,102723475	ATP1A2,KCNE1,KCNJ8,LOC102723475
20_Member	GO Biological Processes	GO:0032412	regulation of ion transmembrane transporter activity	-3.86374	-1.86228	11/263	88,477,844,859,2273,3688,3753,4878,6330,7114,102723475	ACTN2,ATP1A2,CASQ1,CAV3,FHL1,ITGB1,KCNE1,NPPA,SCN4B,TMSB4X,LOC102723475
20_Member	GO Molecular Functions	GO:0015318	inorganic molecular entity transmembrane transporter activity	-3.86067	-1.86079	20/732	477,1329,2743,3749,3753,3761,3764,3777,6330,6533,7388,9016,23439,24145,55002,55244,83862,89872,121601,102723475	ATP1A2,COX5B,GLRB,KCNC4,KCNE1,KCNJ4,KCNJ8,KCNK3,SCN4B,SLC6A6,UQCRH,SLC25A14,ATP1B4,PANX1,TMCO3,SLC47A1,TMEM120A,AQP10,ANO4,LOC102723475
20_Member	GO Biological Processes	GO:0022898	regulation of transmembrane transporter activity	-3.72284	-1.75798	11/273	88,477,844,859,2273,3688,3753,4878,6330,7114,102723475	ACTN2,ATP1A2,CASQ1,CAV3,FHL1,ITGB1,KCNE1,NPPA,SCN4B,TMSB4X,LOC102723475
20_Member	GO Biological Processes	GO:1901017	negative regulation of potassium ion transmembrane transporter activity	-3.66873	-1.71541	4/28	88,859,3753,102723475	ACTN2,CAV3,KCNE1,LOC102723475
20_Member	GO Biological Processes	GO:0042391	regulation of membrane potential	-3.65902	-1.70711	14/425	88,477,664,859,2273,2743,3753,3764,3777,4878,5999,6330,140730,102723475	ACTN2,ATP1A2,BNIP3,CAV3,FHL1,GLRB,KCNE1,KCNJ8,KCNK3,NPPA,RGS4,SCN4B,RIMS4,LOC102723475
20_Member	GO Biological Processes	GO:0098915	membrane repolarization during ventricular cardiac muscle cell action potential	-3.60558	-1.67175	3/12	3753,3764,102723475	KCNE1,KCNJ8,LOC102723475
20_Member	GO Biological Processes	GO:0099625	ventricular cardiac muscle cell membrane repolarization	-3.60558	-1.67175	3/12	3753,3764,102723475	KCNE1,KCNJ8,LOC102723475
20_Member	GO Molecular Functions	GO:1902282	voltage-gated potassium channel activity involved in ventricular cardiac muscle cell action potential repolarization	-3.60558	-1.67175	3/12	3753,3764,102723475	KCNE1,KCNJ8,LOC102723475
20_Member	GO Biological Processes	GO:0043271	negative regulation of ion transport	-3.55823	-1.63249	8/155	88,477,859,3753,4129,5999,6781,102723475	ACTN2,ATP1A2,CAV3,KCNE1,MAOB,RGS4,STC1,LOC102723475
20_Member	GO Molecular Functions	GO:0005249	voltage-gated potassium channel activity	-3.35319	-1.47066	6/91	3749,3753,3761,3764,3777,102723475	KCNC4,KCNE1,KCNJ4,KCNJ8,KCNK3,LOC102723475
20_Member	GO Biological Processes	GO:0006813	potassium ion transport	-3.3239	-1.44857	8/168	477,3749,3753,3761,3764,3777,23439,102723475	ATP1A2,KCNC4,KCNE1,KCNJ4,KCNJ8,KCNK3,ATP1B4,LOC102723475
20_Member	GO Biological Processes	GO:0032409	regulation of transporter activity	-3.31427	-1.44131	11/305	88,477,844,859,2273,3688,3753,4878,6330,7114,102723475	ACTN2,ATP1A2,CASQ1,CAV3,FHL1,ITGB1,KCNE1,NPPA,SCN4B,TMSB4X,LOC102723475
20_Member	GO Molecular Functions	GO:0086008	voltage-gated potassium channel activity involved in cardiac muscle cell action potential repolarization	-3.30033	-1.43325	3/15	3753,3764,102723475	KCNE1,KCNJ8,LOC102723475
20_Member	GO Biological Processes	GO:0034764	positive regulation of transmembrane transport	-3.29215	-1.42623	9/213	88,844,3688,3753,4878,6376,7114,51582,100506658	ACTN2,CASQ1,ITGB1,KCNE1,NPPA,CX3CL1,TMSB4X,AZIN1,OCLN
20_Member	GO Biological Processes	GO:0098660	inorganic ion transmembrane transport	-3.24908	-1.39352	17/637	477,1329,2743,3749,3753,3761,3764,3777,6330,6533,7388,9016,24145,55002,55244,121601,102723475	ATP1A2,COX5B,GLRB,KCNC4,KCNE1,KCNJ4,KCNJ8,KCNK3,SCN4B,SLC6A6,UQCRH,SLC25A14,PANX1,TMCO3,SLC47A1,ANO4,LOC102723475
20_Member	GO Biological Processes	GO:0001508	action potential	-3.20538	-1.36545	6/97	477,859,3753,3764,6330,102723475	ATP1A2,CAV3,KCNE1,KCNJ8,SCN4B,LOC102723475
20_Member	GO Biological Processes	GO:0030048	actin filament-based movement	-3.20538	-1.36545	6/97	859,3753,3764,6330,644150,102723475	CAV3,KCNE1,KCNJ8,SCN4B,WIPF3,LOC102723475
20_Member	GO Biological Processes	GO:1904063	negative regulation of cation transmembrane transport	-3.1818	-1.35056	6/98	88,477,859,3753,5999,102723475	ACTN2,ATP1A2,CAV3,KCNE1,RGS4,LOC102723475
20_Member	GO Biological Processes	GO:0070252	actin-mediated cell contraction	-3.11887	-1.30861	5/67	859,3753,3764,6330,102723475	CAV3,KCNE1,KCNJ8,SCN4B,LOC102723475
20_Member	GO Biological Processes	GO:0034763	negative regulation of transmembrane transport	-3.07904	-1.28355	7/141	88,477,859,3753,5999,8682,102723475	ACTN2,ATP1A2,CAV3,KCNE1,RGS4,PEA15,LOC102723475
20_Member	GO Biological Processes	GO:0034766	negative regulation of ion transmembrane transport	-3.04613	-1.25978	6/104	88,477,859,3753,5999,102723475	ACTN2,ATP1A2,CAV3,KCNE1,RGS4,LOC102723475
20_Member	GO Biological Processes	GO:0002027	regulation of heart rate	-3.02443	-1.24577	6/105	859,3753,4878,5999,6330,102723475	CAV3,KCNE1,NPPA,RGS4,SCN4B,LOC102723475
20_Member	GO Biological Processes	GO:0086013	membrane repolarization during cardiac muscle cell action potential	-2.98578	-1.21654	3/19	3753,3764,102723475	KCNE1,KCNJ8,LOC102723475
20_Member	GO Biological Processes	GO:0099622	cardiac muscle cell membrane repolarization	-2.98578	-1.21654	3/19	3753,3764,102723475	KCNE1,KCNJ8,LOC102723475
20_Member	GO Molecular Functions	GO:0015079	potassium ion transmembrane transporter activity	-2.85623	-1.12761	7/154	477,3749,3753,3761,3764,3777,102723475	ATP1A2,KCNC4,KCNE1,KCNJ4,KCNJ8,KCNK3,LOC102723475
20_Member	GO Biological Processes	GO:0086011	membrane repolarization during action potential	-2.85512	-1.12761	3/21	3753,3764,102723475	KCNE1,KCNJ8,LOC102723475
20_Member	GO Biological Processes	GO:1902259	regulation of delayed rectifier potassium channel activity	-2.85512	-1.12761	3/21	3753,4878,102723475	KCNE1,NPPA,LOC102723475
20_Member	GO Biological Processes	GO:0071805	potassium ion transmembrane transport	-2.79238	-1.07727	7/158	477,3749,3753,3761,3764,3777,102723475	ATP1A2,KCNC4,KCNE1,KCNJ4,KCNJ8,KCNK3,LOC102723475
20_Member	GO Biological Processes	GO:0034767	positive regulation of ion transmembrane transport	-2.71539	-1.01257	7/163	88,844,3688,3753,4878,6376,7114	ACTN2,CASQ1,ITGB1,KCNE1,NPPA,CX3CL1,TMSB4X
20_Member	GO Molecular Functions	GO:0005267	potassium channel activity	-2.70796	-1.00593	6/121	3749,3753,3761,3764,3777,102723475	KCNC4,KCNE1,KCNJ4,KCNJ8,KCNK3,LOC102723475
20_Member	GO Biological Processes	GO:0032413	negative regulation of ion transmembrane transporter activity	-2.70103	-1.00218	5/83	88,477,859,3753,102723475	ACTN2,ATP1A2,CAV3,KCNE1,LOC102723475
20_Member	GO Molecular Functions	GO:0022890	inorganic cation transmembrane transporter activity	-2.68362	-0.992062	15/596	477,1329,3749,3753,3761,3764,3777,6330,6533,7388,23439,24145,55002,55244,102723475	ATP1A2,COX5B,KCNC4,KCNE1,KCNJ4,KCNJ8,KCNK3,SCN4B,SLC6A6,UQCRH,ATP1B4,PANX1,TMCO3,SLC47A1,LOC102723475
20_Member	GO Biological Processes	GO:0043268	positive regulation of potassium ion transport	-2.66592	-0.981949	4/51	88,2273,3753,4878	ACTN2,FHL1,KCNE1,NPPA
20_Member	GO Biological Processes	GO:0140115	export across plasma membrane	-2.51679	-0.875741	4/56	477,3753,55244,102723475	ATP1A2,KCNE1,SLC47A1,LOC102723475
20_Member	GO Biological Processes	GO:2001257	regulation of cation channel activity	-2.47471	-0.848661	7/180	88,844,3688,3753,4878,7114,102723475	ACTN2,CASQ1,ITGB1,KCNE1,NPPA,TMSB4X,LOC102723475
20_Member	GO Biological Processes	GO:0098662	inorganic cation transmembrane transport	-2.43948	-0.820514	14/571	477,1329,3749,3753,3761,3764,3777,6330,6533,7388,24145,55002,55244,102723475	ATP1A2,COX5B,KCNC4,KCNE1,KCNJ4,KCNJ8,KCNK3,SCN4B,SLC6A6,UQCRH,PANX1,TMCO3,SLC47A1,LOC102723475
20_Member	GO Molecular Functions	GO:0008324	cation transmembrane transporter activity	-2.3341	-0.733147	15/650	477,1329,3749,3753,3761,3764,3777,6330,6533,7388,23439,24145,55002,55244,102723475	ATP1A2,COX5B,KCNC4,KCNE1,KCNJ4,KCNJ8,KCNK3,SCN4B,SLC6A6,UQCRH,ATP1B4,PANX1,TMCO3,SLC47A1,LOC102723475
20_Member	GO Molecular Functions	GO:0022843	voltage-gated cation channel activity	-2.33381	-0.733147	6/144	3749,3753,3761,3764,3777,102723475	KCNC4,KCNE1,KCNJ4,KCNJ8,KCNK3,LOC102723475
20_Member	GO Molecular Functions	GO:0005251	delayed rectifier potassium channel activity	-2.28316	-0.696793	3/33	3749,3753,102723475	KCNC4,KCNE1,LOC102723475
20_Member	GO Biological Processes	GO:1904064	positive regulation of cation transmembrane transport	-2.27645	-0.692528	6/148	88,844,3753,4878,6376,7114	ACTN2,CASQ1,KCNE1,NPPA,CX3CL1,TMSB4X
20_Member	GO Biological Processes	GO:0061337	cardiac conduction	-2.26015	-0.679258	4/66	477,3753,6330,102723475	ATP1A2,KCNE1,SCN4B,LOC102723475
20_Member	GO Biological Processes	GO:0032410	negative regulation of transporter activity	-2.24423	-0.669931	5/106	88,477,859,3753,102723475	ACTN2,ATP1A2,CAV3,KCNE1,LOC102723475
20_Member	GO Molecular Functions	GO:0015267	channel activity	-2.22892	-0.657589	12/480	2743,3749,3753,3761,3764,3777,6330,24145,83862,89872,121601,102723475	GLRB,KCNC4,KCNE1,KCNJ4,KCNJ8,KCNK3,SCN4B,PANX1,TMEM120A,AQP10,ANO4,LOC102723475
20_Member	GO Molecular Functions	GO:0022803	passive transmembrane transporter activity	-2.222	-0.651259	12/481	2743,3749,3753,3761,3764,3777,6330,24145,83862,89872,121601,102723475	GLRB,KCNC4,KCNE1,KCNJ4,KCNJ8,KCNK3,SCN4B,PANX1,TMEM120A,AQP10,ANO4,LOC102723475
20_Member	GO Molecular Functions	GO:0005244	voltage-gated ion channel activity	-2.2155	-0.648247	7/201	3749,3753,3761,3764,3777,6330,102723475	KCNC4,KCNE1,KCNJ4,KCNJ8,KCNK3,SCN4B,LOC102723475
20_Member	GO Molecular Functions	GO:0022832	voltage-gated channel activity	-2.2155	-0.648247	7/201	3749,3753,3761,3764,3777,6330,102723475	KCNC4,KCNE1,KCNJ4,KCNJ8,KCNK3,SCN4B,LOC102723475
20_Member	GO Biological Processes	GO:2001259	positive regulation of cation channel activity	-2.14843	-0.601924	4/71	88,844,4878,7114	ACTN2,CASQ1,NPPA,TMSB4X
20_Member	GO Molecular Functions	GO:0005216	ion channel activity	-2.14188	-0.599187	11/432	2743,3749,3753,3761,3764,3777,6330,24145,83862,121601,102723475	GLRB,KCNC4,KCNE1,KCNJ4,KCNJ8,KCNK3,SCN4B,PANX1,TMEM120A,ANO4,LOC102723475
20_Member	GO Biological Processes	GO:0086091	regulation of heart rate by cardiac conduction	-2.07956	-0.551497	3/39	3753,6330,102723475	KCNE1,SCN4B,LOC102723475
20_Member	GO Biological Processes	GO:0098655	cation transmembrane transport	-2.02024	-0.506157	14/640	477,1329,3749,3753,3761,3764,3777,6330,6533,7388,24145,55002,55244,102723475	ATP1A2,COX5B,KCNC4,KCNE1,KCNJ4,KCNJ8,KCNK3,SCN4B,SLC6A6,UQCRH,PANX1,TMCO3,SLC47A1,LOC102723475

## Sheet: Sheet1
GroupID	Category	Term	Description	LogP	Log(q-value)	InTerm_InList	Genes	Symbols
1_Summary	Hallmark Gene Sets	M5891	HALLMARK HYPOXIA	-13.2209	-9.08426	20/200	1316,1843,2023,2026,2027,2632,3099,3939,5033,5230,6095,6533,6781,7167,7422,8553,8974,9672,26355,284119,5223,6662,6676,9123,477,1329,4708,4709,4712,4725,7388,3313,5606,7277,23478,116496,224,4129,5500,9016,79365,1969,4878,4879,6783,7371,23597,122622,5740,27231,1464,7316,10402,10678,92126,170384,384,2752,10825,8128,8821,27090,29906,8091,4259,51582,79094	KLF6,DUSP1,ENO1,ENO2,ENO3,GBE1,HK2,LDHA,P4HA1,PGK1,RORA,SLC6A6,STC1,TPI1,VEGFA,BHLHE40,P4HA2,SDC3,FAM162A,CAVIN1,PGAM1,SOX9,SPAG4,SLC16A3,ATP1A2,COX5B,NDUFB2,NDUFB3,NDUFB6,NDUFS5,UQCRH,HSPA9,MAP2K3,TUBA4A,SEC11A,NIBAN1,ALDH3A2,MAOB,PPP1CB,SLC25A14,BHLHE41,EPHA2,NPPA,NPPB,SULT1E1,UCK2,ACOT9,ADSS1,PTGIS,NMRK2,CSPG4,UBC,ST3GAL6,B3GNT2,DSEL,FUT11,ARG2,GLUL,NEU3,ST8SIA2,INPP4B,ST6GALNAC4,ST8SIA5,HMGA2…
1_Member	Hallmark Gene Sets	M5891	HALLMARK HYPOXIA	-13.2209	-9.08426	20/200	1316,1843,2023,2026,2027,2632,3099,3939,5033,5230,6095,6533,6781,7167,7422,8553,8974,9672,26355,284119	KLF6,DUSP1,ENO1,ENO2,ENO3,GBE1,HK2,LDHA,P4HA1,PGK1,RORA,SLC6A6,STC1,TPI1,VEGFA,BHLHE40,P4HA2,SDC3,FAM162A,CAVIN1
1_Member	Hallmark Gene Sets	M5937	HALLMARK GLYCOLYSIS	-9.23742	-6.16152	16/200	2023,2026,3099,3939,5033,5223,5230,6662,6676,6781,7167,7422,8974,9123,9672,26355	ENO1,ENO2,HK2,LDHA,P4HA1,PGAM1,PGK1,SOX9,SPAG4,STC1,TPI1,VEGFA,P4HA2,SLC16A3,SDC3,FAM162A
1_Member	GO Biological Processes	GO:0046034	ATP metabolic process	-8.46261	-5.50631	15/195	477,1329,2023,2026,2027,3099,3939,4708,4709,4712,4725,5223,5230,7167,7388	ATP1A2,COX5B,ENO1,ENO2,ENO3,HK2,LDHA,NDUFB2,NDUFB3,NDUFB6,NDUFS5,PGAM1,PGK1,TPI1,UQCRH
1_Member	Hallmark Gene Sets	M5924	HALLMARK MTORC1 SIGNALING	-8.31236	-5.40621	15/200	2023,2632,3099,3313,3939,5033,5230,5606,6533,6781,7167,7277,8553,23478,116496	ENO1,GBE1,HK2,HSPA9,LDHA,P4HA1,PGK1,MAP2K3,SLC6A6,STC1,TPI1,TUBA4A,BHLHE40,SEC11A,NIBAN1
1_Member	GO Biological Processes	GO:0006096	glycolytic process	-8.14142	-5.2601	8/39	2023,2026,2027,3099,3939,5223,5230,7167	ENO1,ENO2,ENO3,HK2,LDHA,PGAM1,PGK1,TPI1
1_Member	GO Biological Processes	GO:0006757	ATP generation from ADP	-8.04855	-5.17912	8/40	2023,2026,2027,3099,3939,5223,5230,7167	ENO1,ENO2,ENO3,HK2,LDHA,PGAM1,PGK1,TPI1
1_Member	WikiPathways	WP534	Glycolysis and gluconeogenesis	-7.62111	-4.79627	8/45	2023,2026,2027,3099,3939,5223,5230,7167	ENO1,ENO2,ENO3,HK2,LDHA,PGAM1,PGK1,TPI1
1_Member	KEGG Pathway	hsa00010	Glycolysis / Gluconeogenesis	-7.39231	-4.58586	9/67	224,2023,2026,2027,3099,3939,5223,5230,7167	ALDH3A2,ENO1,ENO2,ENO3,HK2,LDHA,PGAM1,PGK1,TPI1
1_Member	GO Biological Processes	GO:0046031	ADP metabolic process	-7.39001	-4.58586	8/48	2023,2026,2027,3099,3939,5223,5230,7167	ENO1,ENO2,ENO3,HK2,LDHA,PGAM1,PGK1,TPI1
1_Member	GO Biological Processes	GO:0006091	generation of precursor metabolites and energy	-7.31356	-4.51939	19/388	1329,2023,2026,2027,2632,3099,3939,4129,4708,4709,4712,4725,5223,5230,5500,7167,7388,8974,9016	COX5B,ENO1,ENO2,ENO3,GBE1,HK2,LDHA,MAOB,NDUFB2,NDUFB3,NDUFB6,NDUFS5,PGAM1,PGK1,PPP1CB,TPI1,UQCRH,P4HA2,SLC25A14
1_Member	GO Biological Processes	GO:0006165	nucleoside diphosphate phosphorylation	-6.78489	-4.04624	8/57	2023,2026,2027,3099,3939,5223,5230,7167	ENO1,ENO2,ENO3,HK2,LDHA,PGAM1,PGK1,TPI1
1_Member	GO Biological Processes	GO:0046939	nucleotide phosphorylation	-6.72446	-3.99441	8/58	2023,2026,2027,3099,3939,5223,5230,7167	ENO1,ENO2,ENO3,HK2,LDHA,PGAM1,PGK1,TPI1
1_Member	GO Biological Processes	GO:0006090	pyruvate metabolic process	-6.60708	-3.88546	8/60	2023,2026,2027,3099,3939,5223,5230,7167	ENO1,ENO2,ENO3,HK2,LDHA,PGAM1,PGK1,TPI1
1_Member	GO Biological Processes	GO:0009135	purine nucleoside diphosphate metabolic process	-6.55006	-3.84483	8/61	2023,2026,2027,3099,3939,5223,5230,7167	ENO1,ENO2,ENO3,HK2,LDHA,PGAM1,PGK1,TPI1
1_Member	GO Biological Processes	GO:0009179	purine ribonucleoside diphosphate metabolic process	-6.55006	-3.84483	8/61	2023,2026,2027,3099,3939,5223,5230,7167	ENO1,ENO2,ENO3,HK2,LDHA,PGAM1,PGK1,TPI1
1_Member	WikiPathways	WP4018	Clear cell renal cell carcinoma pathways	-6.39454	-3.74225	9/87	2023,2026,2027,3099,3939,5230,7167,7422,79365	ENO1,ENO2,ENO3,HK2,LDHA,PGK1,TPI1,VEGFA,BHLHE41
1_Member	GO Biological Processes	GO:0009259	ribonucleotide metabolic process	-6.36968	-3.72737	16/320	1969,2023,2026,2027,3099,3939,4878,4879,5223,5230,6095,6783,7167,7371,23597,122622	EPHA2,ENO1,ENO2,ENO3,HK2,LDHA,NPPA,NPPB,PGAM1,PGK1,RORA,SULT1E1,TPI1,UCK2,ACOT9,ADSS1
1_Member	GO Biological Processes	GO:0009117	nucleotide metabolic process	-6.29332	-3.66187	18/408	1969,2023,2026,2027,3099,3939,4878,4879,5223,5230,5740,6095,6783,7167,7371,23597,27231,122622	EPHA2,ENO1,ENO2,ENO3,HK2,LDHA,NPPA,NPPB,PGAM1,PGK1,PTGIS,RORA,SULT1E1,TPI1,UCK2,ACOT9,NMRK2,ADSS1
1_Member	GO Biological Processes	GO:0019693	ribose phosphate metabolic process	-6.1924	-3.58926	16/330	1969,2023,2026,2027,3099,3939,4878,4879,5223,5230,6095,6783,7167,7371,23597,122622	EPHA2,ENO1,ENO2,ENO3,HK2,LDHA,NPPA,NPPB,PGAM1,PGK1,RORA,SULT1E1,TPI1,UCK2,ACOT9,ADSS1
1_Member	GO Biological Processes	GO:0006753	nucleoside phosphate metabolic process	-6.15669	-3.56417	18/417	1969,2023,2026,2027,3099,3939,4878,4879,5223,5230,5740,6095,6783,7167,7371,23597,27231,122622	EPHA2,ENO1,ENO2,ENO3,HK2,LDHA,NPPA,NPPB,PGAM1,PGK1,PTGIS,RORA,SULT1E1,TPI1,UCK2,ACOT9,NMRK2,ADSS1
1_Member	Reactome Gene Sets	R-HSA-71387	Metabolism of carbohydrates	-6.09922	-3.51893	15/295	1464,2023,2026,2027,2632,3099,5223,5230,7167,7316,9672,10402,10678,92126,170384	CSPG4,ENO1,ENO2,ENO3,GBE1,HK2,PGAM1,PGK1,TPI1,UBC,SDC3,ST3GAL6,B3GNT2,DSEL,FUT11
1_Member	GO Biological Processes	GO:0009185	ribonucleoside diphosphate metabolic process	-6.08034	-3.50604	8/70	2023,2026,2027,3099,3939,5223,5230,7167	ENO1,ENO2,ENO3,HK2,LDHA,PGAM1,PGK1,TPI1
1_Member	GO Biological Processes	GO:0009150	purine ribonucleotide metabolic process	-5.97184	-3.4207	15/302	1969,2023,2026,2027,3099,3939,4878,4879,5223,5230,6095,6783,7167,23597,122622	EPHA2,ENO1,ENO2,ENO3,HK2,LDHA,NPPA,NPPB,PGAM1,PGK1,RORA,SULT1E1,TPI1,ACOT9,ADSS1
1_Member	KEGG Pathway	hsa01230	Biosynthesis of amino acids	-5.84829	-3.3574	8/75	384,2023,2026,2027,2752,5223,5230,7167	ARG2,ENO1,ENO2,ENO3,GLUL,PGAM1,PGK1,TPI1
1_Member	Reactome Gene Sets	R-HSA-70263	Gluconeogenesis	-5.82679	-3.34341	6/34	2023,2026,2027,5223,5230,7167	ENO1,ENO2,ENO3,PGAM1,PGK1,TPI1
1_Member	GO Biological Processes	GO:0016052	carbohydrate catabolic process	-5.80554	-3.3317	9/102	2023,2026,2027,3099,3939,5223,5230,7167,10825	ENO1,ENO2,ENO3,HK2,LDHA,PGAM1,PGK1,TPI1,NEU3
1_Member	GO Biological Processes	GO:0006163	purine nucleotide metabolic process	-5.74487	-3.28125	15/315	1969,2023,2026,2027,3099,3939,4878,4879,5223,5230,6095,6783,7167,23597,122622	EPHA2,ENO1,ENO2,ENO3,HK2,LDHA,NPPA,NPPB,PGAM1,PGK1,RORA,SULT1E1,TPI1,ACOT9,ADSS1
1_Member	GO Biological Processes	GO:0072521	purine-containing compound metabolic process	-5.40235	-3.01168	15/336	1969,2023,2026,2027,3099,3939,4878,4879,5223,5230,6095,6783,7167,23597,122622	EPHA2,ENO1,ENO2,ENO3,HK2,LDHA,NPPA,NPPB,PGAM1,PGK1,RORA,SULT1E1,TPI1,ACOT9,ADSS1
1_Member	GO Molecular Functions	GO:0004634	phosphopyruvate hydratase activity	-5.31829	-2.94513	3/4	2023,2026,2027	ENO1,ENO2,ENO3
1_Member	GO Biological Processes	GO:0009132	nucleoside diphosphate metabolic process	-5.2827	-2.91696	8/89	2023,2026,2027,3099,3939,5223,5230,7167	ENO1,ENO2,ENO3,HK2,LDHA,PGAM1,PGK1,TPI1
1_Member	GO Biological Processes	GO:0055086	nucleobase-containing small molecule metabolic process	-5.26108	-2.90579	18/483	1969,2023,2026,2027,3099,3939,4878,4879,5223,5230,5740,6095,6783,7167,7371,23597,27231,122622	EPHA2,ENO1,ENO2,ENO3,HK2,LDHA,NPPA,NPPB,PGAM1,PGK1,PTGIS,RORA,SULT1E1,TPI1,UCK2,ACOT9,NMRK2,ADSS1
1_Member	WikiPathways	WP4629	Aerobic glycolysis	-5.2267	-2.88357	4/12	2023,3939,5230,7167	ENO1,LDHA,PGK1,TPI1
1_Member	Reactome Gene Sets	R-HSA-70171	Glycolysis	-4.95567	-2.67034	7/71	2023,2026,2027,3099,5223,5230,7167	ENO1,ENO2,ENO3,HK2,PGAM1,PGK1,TPI1
1_Member	GO Biological Processes	GO:0005975	carbohydrate metabolic process	-4.9291	-2.65495	17/462	2023,2026,2027,2632,3099,3939,5223,5230,5500,7167,8128,8821,10402,10678,10825,27090,29906	ENO1,ENO2,ENO3,GBE1,HK2,LDHA,PGAM1,PGK1,PPP1CB,TPI1,ST8SIA2,INPP4B,ST3GAL6,B3GNT2,NEU3,ST6GALNAC4,ST8SIA5
1_Member	KEGG Pathway	hsa04066	HIF-1 signaling pathway	-4.63218	-2.42755	8/109	2023,2026,2027,3099,3939,4878,5230,7422	ENO1,ENO2,ENO3,HK2,LDHA,NPPA,PGK1,VEGFA
1_Member	WikiPathways	WP1946	Cori cycle	-4.56309	-2.3764	4/17	3939,5223,5230,7167	LDHA,PGAM1,PGK1,TPI1
1_Member	Reactome Gene Sets	R-HSA-70326	Glucose metabolism	-4.25046	-2.14421	7/91	2023,2026,2027,3099,5223,5230,7167	ENO1,ENO2,ENO3,HK2,PGAM1,PGK1,TPI1
1_Member	WikiPathways	WP4290	Metabolic reprogramming in colon cancer	-3.98094	-1.95325	5/44	2023,3939,5223,5230,9123	ENO1,LDHA,PGAM1,PGK1,SLC16A3
1_Member	GO Biological Processes	GO:0019674	NAD metabolic process	-3.93895	-1.91797	4/24	2023,2026,3099,27231	ENO1,ENO2,HK2,NMRK2
1_Member	GO Biological Processes	GO:0006735	NADH regeneration	-3.72707	-1.76074	3/11	2023,2026,3099	ENO1,ENO2,HK2
1_Member	GO Biological Processes	GO:0061621	canonical glycolysis	-3.72707	-1.76074	3/11	2023,2026,3099	ENO1,ENO2,HK2
1_Member	GO Biological Processes	GO:0061718	glucose catabolic process to pyruvate	-3.72707	-1.76074	3/11	2023,2026,3099	ENO1,ENO2,HK2
1_Member	WikiPathways	WP5049	Glycolysis in senescence	-3.72707	-1.76074	3/11	2023,3939,5230	ENO1,LDHA,PGK1
1_Member	GO Molecular Functions	GO:0016835	carbon-oxygen lyase activity	-3.6866	-1.72754	6/79	2023,2026,2027,5740,7167,8091	ENO1,ENO2,ENO3,PTGIS,TPI1,HMGA2
1_Member	KEGG Pathway	hsa01200	Carbon metabolism	-3.61167	-1.67175	7/115	2023,2026,2027,3099,5223,5230,7167	ENO1,ENO2,ENO3,HK2,PGAM1,PGK1,TPI1
1_Member	GO Molecular Functions	GO:0016829	lyase activity	-3.5719	-1.64214	9/195	2023,2026,2027,4259,5740,7167,8091,51582,79094	ENO1,ENO2,ENO3,MGST3,PTGIS,TPI1,HMGA2,AZIN1,CHAC1
1_Member	GO Biological Processes	GO:0061615	glycolytic process through fructose-6-phosphate	-3.49508	-1.57991	3/13	2023,2026,3099	ENO1,ENO2,HK2
1_Member	GO Biological Processes	GO:0061620	glycolytic process through glucose-6-phosphate	-3.49508	-1.57991	3/13	2023,2026,3099	ENO1,ENO2,HK2
1_Member	GO Biological Processes	GO:0006007	glucose catabolic process	-3.30033	-1.43325	3/15	2023,2026,3099	ENO1,ENO2,HK2
1_Member	GO Biological Processes	GO:0016051	carbohydrate biosynthetic process	-2.78208	-1.06873	6/117	2026,2632,5230,7167,10402,10678	ENO2,GBE1,PGK1,TPI1,ST3GAL6,B3GNT2
1_Member	Reactome Gene Sets	R-HSA-9637690	Response of Mtb to phagocytosis	-2.73762	-1.02997	3/23	2023,5230,7316	ENO1,PGK1,UBC
1_Member	GO Biological Processes	GO:0006734	NADH metabolic process	-2.63096	-0.956015	3/25	2023,2026,3099	ENO1,ENO2,HK2
1_Member	Reactome Gene Sets	R-HSA-9635486	Infection with Mycobacterium tuberculosis	-2.53341	-0.886071	3/27	2023,5230,7316	ENO1,PGK1,UBC
1_Member	GO Biological Processes	GO:0019320	hexose catabolic process	-2.40127	-0.789718	3/30	2023,2026,3099	ENO1,ENO2,HK2
1_Member	GO Biological Processes	GO:0006006	glucose metabolic process	-2.36943	-0.761754	5/99	2023,2026,3099,5230,7167	ENO1,ENO2,HK2,PGK1,TPI1
1_Member	GO Biological Processes	GO:0006094	gluconeogenesis	-2.36048	-0.757275	3/31	2026,5230,7167	ENO2,PGK1,TPI1
1_Member	GO Molecular Functions	GO:0016836	hydro-lyase activity	-2.30768	-0.713907	4/64	2023,2026,2027,5740	ENO1,ENO2,ENO3,PTGIS
1_Member	GO Biological Processes	GO:0019319	hexose biosynthetic process	-2.24645	-0.670959	3/34	2026,5230,7167	ENO2,PGK1,TPI1
1_Member	GO Biological Processes	GO:0046365	monosaccharide catabolic process	-2.17656	-0.621459	3/36	2023,2026,3099	ENO1,ENO2,HK2
1_Member	GO Biological Processes	GO:0046364	monosaccharide biosynthetic process	-2.11093	-0.575305	3/38	2026,5230,7167	ENO2,PGK1,TPI1
2_Summary	Hallmark Gene Sets	M5930	HALLMARK EPITHELIAL MESENCHYMAL TRANSITION	-13.2209	-9.08426	20/200	374,388,1281,1303,1647,1809,2026,3485,3688,3690,5396,5999,6387,6422,6445,7169,7422,8572,10272,56937	AREG,RHOB,COL3A1,COL12A1,GADD45A,DPYSL3,ENO2,IGFBP2,ITGB1,ITGB3,PRRX1,RGS4,CXCL12,SFRP1,SGCG,TPM2,VEGFA,PDLIM4,FSTL3,PMEPA1
2_Member	Hallmark Gene Sets	M5930	HALLMARK EPITHELIAL MESENCHYMAL TRANSITION	-13.2209	-9.08426	20/200	374,388,1281,1303,1647,1809,2026,3485,3688,3690,5396,5999,6387,6422,6445,7169,7422,8572,10272,56937	AREG,RHOB,COL3A1,COL12A1,GADD45A,DPYSL3,ENO2,IGFBP2,ITGB1,ITGB3,PRRX1,RGS4,CXCL12,SFRP1,SGCG,TPM2,VEGFA,PDLIM4,FSTL3,PMEPA1
3_Summary	Hallmark Gene Sets	M5909	HALLMARK MYOGENESIS	-12.1851	-8.22456	19/200	58,88,844,859,1281,1674,2027,2273,3679,3688,4633,5740,6445,7134,7164,7169,8553,8557,58529,650,4878,4879,6662,7137,7422,7490,84525,129446,6095,8291,8572,27295,347273,100128927,2050,3764,5606,8862,23768,51196,83881,1272,64398,1264,3833,6169,51065	ACTA1,ACTN2,CASQ1,CAV3,COL3A1,DES,ENO3,FHL1,ITGA7,ITGB1,MYL2,PTGIS,SGCG,TNNC1,TPD52L1,TPM2,BHLHE40,TCAP,MYOZ1,BMP2,NPPA,NPPB,SOX9,TNNI3,VEGFA,WT1,HOPX,XIRP2,RORA,DYSF,PDLIM4,PDLIM3,CAVIN4,ZBTB42,EPHB4,KCNJ8,MAP2K3,APLN,FLRT2,PLCE1,MIXL1,CNTN1,PALS1,CNN1,KIFC1,RPL38,RPS27L
3_Member	Hallmark Gene Sets	M5909	HALLMARK MYOGENESIS	-12.1851	-8.22456	19/200	58,88,844,859,1281,1674,2027,2273,3679,3688,4633,5740,6445,7134,7164,7169,8553,8557,58529	ACTA1,ACTN2,CASQ1,CAV3,COL3A1,DES,ENO3,FHL1,ITGA7,ITGB1,MYL2,PTGIS,SGCG,TNNC1,TPD52L1,TPM2,BHLHE40,TCAP,MYOZ1
3_Member	GO Biological Processes	GO:0060537	muscle tissue development	-10.6781	-7.28186	21/306	58,88,650,844,859,1281,3679,3688,4633,4878,4879,6445,6662,7134,7137,7422,7490,8557,58529,84525,129446	ACTA1,ACTN2,BMP2,CASQ1,CAV3,COL3A1,ITGA7,ITGB1,MYL2,NPPA,NPPB,SGCG,SOX9,TNNC1,TNNI3,VEGFA,WT1,TCAP,MYOZ1,HOPX,XIRP2
3_Member	GO Biological Processes	GO:0061061	muscle structure development	-10.0111	-6.71958	25/480	58,88,650,844,859,1281,2273,3679,3688,4633,6095,6445,6662,7134,7137,7422,7490,8291,8557,8572,27295,58529,129446,347273,100128927	ACTA1,ACTN2,BMP2,CASQ1,CAV3,COL3A1,FHL1,ITGA7,ITGB1,MYL2,RORA,SGCG,SOX9,TNNC1,TNNI3,VEGFA,WT1,DYSF,TCAP,PDLIM4,PDLIM3,MYOZ1,XIRP2,CAVIN4,ZBTB42
3_Member	GO Biological Processes	GO:0007507	heart development	-9.61836	-6.39744	26/542	88,650,859,1281,2050,3688,3764,4633,4878,4879,5606,6445,6662,7134,7137,7422,7490,8557,8572,8862,23768,27295,51196,83881,84525,129446	ACTN2,BMP2,CAV3,COL3A1,EPHB4,ITGB1,KCNJ8,MYL2,NPPA,NPPB,MAP2K3,SGCG,SOX9,TNNC1,TNNI3,VEGFA,WT1,TCAP,PDLIM4,APLN,FLRT2,PDLIM3,PLCE1,MIXL1,HOPX,XIRP2
3_Member	GO Biological Processes	GO:0014706	striated muscle tissue development	-9.44958	-6.29071	19/287	58,88,650,844,859,3679,3688,4633,4878,4879,6445,7134,7137,7422,7490,8557,58529,84525,129446	ACTA1,ACTN2,BMP2,CASQ1,CAV3,ITGA7,ITGB1,MYL2,NPPA,NPPB,SGCG,TNNC1,TNNI3,VEGFA,WT1,TCAP,MYOZ1,HOPX,XIRP2
3_Member	GO Biological Processes	GO:0048738	cardiac muscle tissue development	-9.18221	-6.1248	15/173	88,650,859,3688,4633,4878,4879,6445,7134,7137,7422,7490,8557,84525,129446	ACTN2,BMP2,CAV3,ITGB1,MYL2,NPPA,NPPB,SGCG,TNNC1,TNNI3,VEGFA,WT1,TCAP,HOPX,XIRP2
3_Member	GO Biological Processes	GO:0007517	muscle organ development	-7.83969	-4.99313	17/285	58,650,844,859,1281,2273,3679,4633,6445,7134,7137,7490,8557,58529,129446,347273,100128927	ACTA1,BMP2,CASQ1,CAV3,COL3A1,FHL1,ITGA7,MYL2,SGCG,TNNC1,TNNI3,WT1,TCAP,MYOZ1,XIRP2,CAVIN4,ZBTB42
3_Member	GO Biological Processes	GO:0042692	muscle cell differentiation	-6.04481	-3.48224	14/259	58,88,650,844,859,3688,4633,6095,6662,7422,7490,8291,8557,58529	ACTA1,ACTN2,BMP2,CASQ1,CAV3,ITGB1,MYL2,RORA,SOX9,VEGFA,WT1,DYSF,TCAP,MYOZ1
3_Member	GO Biological Processes	GO:0010927	cellular component assembly involved in morphogenesis	-5.80554	-3.3317	9/102	58,88,844,1272,3688,4633,8557,58529,64398	ACTA1,ACTN2,CASQ1,CNTN1,ITGB1,MYL2,TCAP,MYOZ1,PALS1
3_Member	GO Biological Processes	GO:0055007	cardiac muscle cell differentiation	-5.43324	-3.03304	8/85	88,650,859,3688,4633,7422,7490,8557	ACTN2,BMP2,CAV3,ITGB1,MYL2,VEGFA,WT1,TCAP
3_Member	GO Biological Processes	GO:0030239	myofibril assembly	-5.40009	-3.01168	7/61	58,88,844,3688,4633,8557,58529	ACTA1,ACTN2,CASQ1,ITGB1,MYL2,TCAP,MYOZ1
3_Member	GO Biological Processes	GO:0055002	striated muscle cell development	-5.35202	-2.9713	7/62	58,88,844,3688,4633,8557,58529	ACTA1,ACTN2,CASQ1,ITGB1,MYL2,TCAP,MYOZ1
3_Member	GO Biological Processes	GO:0055001	muscle cell development	-5.09983	-2.78606	10/157	58,88,844,859,3688,4633,7422,8291,8557,58529	ACTA1,ACTN2,CASQ1,CAV3,ITGB1,MYL2,VEGFA,DYSF,TCAP,MYOZ1
3_Member	GO Biological Processes	GO:0051146	striated muscle cell differentiation	-5.0475	-2.7466	11/195	58,88,650,844,859,3688,4633,7422,7490,8557,58529	ACTA1,ACTN2,BMP2,CASQ1,CAV3,ITGB1,MYL2,VEGFA,WT1,TCAP,MYOZ1
3_Member	GO Biological Processes	GO:0031032	actomyosin structure organization	-4.60339	-2.4088	8/110	58,88,844,1264,3688,4633,8557,58529	ACTA1,ACTN2,CASQ1,CNN1,ITGB1,MYL2,TCAP,MYOZ1
3_Member	GO Biological Processes	GO:0035051	cardiocyte differentiation	-4.46393	-2.29816	8/115	88,650,859,3688,4633,7422,7490,8557	ACTN2,BMP2,CAV3,ITGB1,MYL2,VEGFA,WT1,TCAP
3_Member	GO Biological Processes	GO:0045214	sarcomere organization	-4.29335	-2.16748	5/38	88,844,3688,8557,58529	ACTN2,CASQ1,ITGB1,TCAP,MYOZ1
3_Member	GO Biological Processes	GO:0055013	cardiac muscle cell development	-3.30665	-1.43605	5/61	88,859,4633,7422,8557	ACTN2,CAV3,MYL2,VEGFA,TCAP
3_Member	GO Biological Processes	GO:0055006	cardiac cell development	-3.11887	-1.30861	5/67	88,859,4633,7422,8557	ACTN2,CAV3,MYL2,VEGFA,TCAP
3_Member	GO Biological Processes	GO:0140694	non-membrane-bounded organelle assembly	-2.70179	-1.00218	10/310	58,88,844,3688,3833,4633,6169,8557,51065,58529	ACTA1,ACTN2,CASQ1,ITGB1,KIFC1,MYL2,RPL38,TCAP,RPS27L,MYOZ1
4_Summary	GO Molecular Functions	GO:0050839	cell adhesion molecule binding	-11.5347	-7.70138	29/557	88,421,961,977,1006,1272,1281,1969,2023,3679,3688,3690,3898,3939,4240,4345,5794,6282,6376,6387,7060,8727,10457,10518,23075,55714,81624,114990,152330	ACTN2,ARVCF,CD47,CD151,CDH8,CNTN1,COL3A1,EPHA2,ENO1,ITGA7,ITGB1,ITGB3,LAD1,LDHA,MFGE8,CD200,PTPRH,S100A11,CX3CL1,CXCL12,THBS4,CTNNAL1,GPNMB,CIB2,SWAP70,TENM3,DIAPH3,VASN,CNTN4
4_Member	GO Molecular Functions	GO:0050839	cell adhesion molecule binding	-11.5347	-7.70138	29/557	88,421,961,977,1006,1272,1281,1969,2023,3679,3688,3690,3898,3939,4240,4345,5794,6282,6376,6387,7060,8727,10457,10518,23075,55714,81624,114990,152330	ACTN2,ARVCF,CD47,CD151,CDH8,CNTN1,COL3A1,EPHA2,ENO1,ITGA7,ITGB1,ITGB3,LAD1,LDHA,MFGE8,CD200,PTPRH,S100A11,CX3CL1,CXCL12,THBS4,CTNNAL1,GPNMB,CIB2,SWAP70,TENM3,DIAPH3,VASN,CNTN4
4_Member	GO Molecular Functions	GO:0045296	cadherin binding	-4.15876	-2.0922	13/333	421,1006,1969,2023,3688,3898,3939,5794,6282,8727,23075,81624,114990	ARVCF,CDH8,EPHA2,ENO1,ITGB1,LAD1,LDHA,PTPRH,S100A11,CTNNAL1,SWAP70,DIAPH3,VASN
5_Summary	GO Biological Processes	GO:0030029	actin filament-based process	-11.44	-7.70138	30/602	58,88,388,390,844,859,1264,1809,2620,3688,3753,3764,4633,6330,7114,7169,8557,8572,10083,10160,23075,27295,58529,81624,83543,129446,253260,254102,644150,102723475,7134,7137,8727,11346,22846,24145,26064,56062,79789,91977,1281,1303,1674,5033	ACTA1,ACTN2,RHOB,RND3,CASQ1,CAV3,CNN1,DPYSL3,GAS2,ITGB1,KCNE1,KCNJ8,MYL2,SCN4B,TMSB4X,TPM2,TCAP,PDLIM4,USH1C,FARP1,SWAP70,PDLIM3,MYOZ1,DIAPH3,AIF1L,XIRP2,RICTOR,EHBP1L1,WIPF3,LOC102723475,TNNC1,TNNI3,CTNNAL1,SYNPO,VASH1,PANX1,RAI14,KLHL4,CLMN,MYOZ3,COL3A1,COL12A1,DES,P4HA1
5_Member	GO Biological Processes	GO:0030029	actin filament-based process	-11.44	-7.70138	30/602	58,88,388,390,844,859,1264,1809,2620,3688,3753,3764,4633,6330,7114,7169,8557,8572,10083,10160,23075,27295,58529,81624,83543,129446,253260,254102,644150,102723475	ACTA1,ACTN2,RHOB,RND3,CASQ1,CAV3,CNN1,DPYSL3,GAS2,ITGB1,KCNE1,KCNJ8,MYL2,SCN4B,TMSB4X,TPM2,TCAP,PDLIM4,USH1C,FARP1,SWAP70,PDLIM3,MYOZ1,DIAPH3,AIF1L,XIRP2,RICTOR,EHBP1L1,WIPF3,LOC102723475
5_Member	GO Molecular Functions	GO:0003779	actin binding	-10.8358	-7.33948	25/439	88,1264,2620,3688,4633,7114,7134,7137,7169,8572,8727,10083,11346,22846,24145,26064,27295,56062,58529,79789,81624,83543,91977,129446,644150	ACTN2,CNN1,GAS2,ITGB1,MYL2,TMSB4X,TNNC1,TNNI3,TPM2,PDLIM4,CTNNAL1,USH1C,SYNPO,VASH1,PANX1,RAI14,PDLIM3,KLHL4,MYOZ1,CLMN,DIAPH3,AIF1L,MYOZ3,XIRP2,WIPF3
5_Member	GO Biological Processes	GO:0030036	actin cytoskeleton organization	-8.95141	-5.91173	25/540	58,88,388,390,844,859,1264,1809,2620,3688,4633,7114,7169,8557,8572,10083,10160,23075,27295,58529,81624,83543,129446,253260,254102	ACTA1,ACTN2,RHOB,RND3,CASQ1,CAV3,CNN1,DPYSL3,GAS2,ITGB1,MYL2,TMSB4X,TPM2,TCAP,PDLIM4,USH1C,FARP1,SWAP70,PDLIM3,MYOZ1,DIAPH3,AIF1L,XIRP2,RICTOR,EHBP1L1
5_Member	GO Biological Processes	GO:0097435	supramolecular fiber organization	-7.87682	-5.01898	23/522	58,88,388,390,844,859,1281,1303,1674,1809,2620,3688,4633,5033,7114,7169,8557,10083,23075,58529,81624,83543,129446	ACTA1,ACTN2,RHOB,RND3,CASQ1,CAV3,COL3A1,COL12A1,DES,DPYSL3,GAS2,ITGB1,MYL2,P4HA1,TMSB4X,TPM2,TCAP,USH1C,SWAP70,MYOZ1,DIAPH3,AIF1L,XIRP2
5_Member	GO Biological Processes	GO:0007015	actin filament organization	-5.88829	-3.36448	14/267	58,388,390,859,1809,2620,7114,7169,8557,10083,23075,81624,83543,129446	ACTA1,RHOB,RND3,CAV3,DPYSL3,GAS2,TMSB4X,TPM2,TCAP,USH1C,SWAP70,DIAPH3,AIF1L,XIRP2
5_Member	GO Molecular Functions	GO:0051015	actin filament binding	-4.66988	-2.45739	11/214	88,2620,7134,7137,7169,8727,10083,24145,79789,83543,129446	ACTN2,GAS2,TNNC1,TNNI3,TPM2,CTNNAL1,USH1C,PANX1,CLMN,AIF1L,XIRP2
6_Summary	GO Biological Processes	GO:2000147	positive regulation of cell motility	-11.0355	-7.376	29/584	306,388,650,728,961,977,1969,2043,3688,3690,5328,5606,6237,6282,6376,6387,6662,7060,7114,7422,9423,9806,10457,22800,23075,54437,58515,64115,284119,384,1843,1948,3485,5500,6281,6422,10272,27242,55714,151887,201294	ANXA3,RHOB,BMP2,C5AR1,CD47,CD151,EPHA2,EPHA4,ITGB1,ITGB3,PLAU,MAP2K3,RRAS,S100A11,CX3CL1,CXCL12,SOX9,THBS4,TMSB4X,VEGFA,NTN1,SPOCK2,GPNMB,RRAS2,SWAP70,SEMA5B,SELENOK,VSIR,CAVIN1,ARG2,DUSP1,EFNB2,IGFBP2,PPP1CB,S100A10,SFRP1,FSTL3,TNFRSF21,TENM3,CCDC80,UNC13D
6_Member	GO Biological Processes	GO:2000147	positive regulation of cell motility	-11.0355	-7.376	29/584	306,388,650,728,961,977,1969,2043,3688,3690,5328,5606,6237,6282,6376,6387,6662,7060,7114,7422,9423,9806,10457,22800,23075,54437,58515,64115,284119	ANXA3,RHOB,BMP2,C5AR1,CD47,CD151,EPHA2,EPHA4,ITGB1,ITGB3,PLAU,MAP2K3,RRAS,S100A11,CX3CL1,CXCL12,SOX9,THBS4,TMSB4X,VEGFA,NTN1,SPOCK2,GPNMB,RRAS2,SWAP70,SEMA5B,SELENOK,VSIR,CAVIN1
6_Member	GO Biological Processes	GO:0051272	positive regulation of cellular component movement	-10.8229	-7.33948	29/596	306,388,650,728,961,977,1969,2043,3688,3690,5328,5606,6237,6282,6376,6387,6662,7060,7114,7422,9423,9806,10457,22800,23075,54437,58515,64115,284119	ANXA3,RHOB,BMP2,C5AR1,CD47,CD151,EPHA2,EPHA4,ITGB1,ITGB3,PLAU,MAP2K3,RRAS,S100A11,CX3CL1,CXCL12,SOX9,THBS4,TMSB4X,VEGFA,NTN1,SPOCK2,GPNMB,RRAS2,SWAP70,SEMA5B,SELENOK,VSIR,CAVIN1
6_Member	GO Biological Processes	GO:0040017	positive regulation of locomotion	-10.7706	-7.33293	29/599	306,388,650,728,961,977,1969,2043,3688,3690,5328,5606,6237,6282,6376,6387,6662,7060,7114,7422,9423,9806,10457,22800,23075,54437,58515,64115,284119	ANXA3,RHOB,BMP2,C5AR1,CD47,CD151,EPHA2,EPHA4,ITGB1,ITGB3,PLAU,MAP2K3,RRAS,S100A11,CX3CL1,CXCL12,SOX9,THBS4,TMSB4X,VEGFA,NTN1,SPOCK2,GPNMB,RRAS2,SWAP70,SEMA5B,SELENOK,VSIR,CAVIN1
6_Member	GO Biological Processes	GO:0030335	positive regulation of cell migration	-9.31586	-6.22066	26/560	306,388,650,728,961,977,1969,2043,3688,3690,5328,5606,6237,6282,6376,6387,6662,7060,7114,7422,10457,22800,23075,54437,58515,64115	ANXA3,RHOB,BMP2,C5AR1,CD47,CD151,EPHA2,EPHA4,ITGB1,ITGB3,PLAU,MAP2K3,RRAS,S100A11,CX3CL1,CXCL12,SOX9,THBS4,TMSB4X,VEGFA,GPNMB,RRAS2,SWAP70,SEMA5B,SELENOK,VSIR
6_Member	GO Biological Processes	GO:0030155	regulation of cell adhesion	-7.19829	-4.43105	27/760	384,650,961,1843,1948,1969,2043,3485,5328,5500,6237,6281,6376,6387,6422,6662,7422,9806,10272,10457,23075,27242,55714,58515,64115,151887,201294	ARG2,BMP2,CD47,DUSP1,EFNB2,EPHA2,EPHA4,IGFBP2,PLAU,PPP1CB,RRAS,S100A10,CX3CL1,CXCL12,SFRP1,SOX9,VEGFA,SPOCK2,FSTL3,GPNMB,SWAP70,TNFRSF21,TENM3,SELENOK,VSIR,CCDC80,UNC13D
6_Member	GO Biological Processes	GO:0045785	positive regulation of cell adhesion	-4.53955	-2.3572	16/446	961,1948,2043,3485,6237,6281,6376,6387,6422,7422,9806,10272,58515,64115,151887,201294	CD47,EFNB2,EPHA4,IGFBP2,RRAS,S100A10,CX3CL1,CXCL12,SFRP1,VEGFA,SPOCK2,FSTL3,SELENOK,VSIR,CCDC80,UNC13D
7_Summary	GO Biological Processes	GO:0048729	tissue morphogenesis	-10.849	-7.33948	28/554	58,374,388,650,977,1281,1948,1969,2043,3688,3690,4633,5241,6422,6662,6781,7134,7137,7422,7490,8091,8557,9423,10116,64398,92344,129446,286204,3099,3664,8862,1054,5230,7357,10083,57110	ACTA1,AREG,RHOB,BMP2,CD151,COL3A1,EFNB2,EPHA2,EPHA4,ITGB1,ITGB3,MYL2,PGR,SFRP1,SOX9,STC1,TNNC1,TNNI3,VEGFA,WT1,HMGA2,TCAP,NTN1,FEM1B,PALS1,GORAB,XIRP2,CRB2,HK2,IRF6,APLN,CEBPG,PGK1,UGCG,USH1C,PLAAT1
7_Member	GO Biological Processes	GO:0048729	tissue morphogenesis	-10.849	-7.33948	28/554	58,374,388,650,977,1281,1948,1969,2043,3688,3690,4633,5241,6422,6662,6781,7134,7137,7422,7490,8091,8557,9423,10116,64398,92344,129446,286204	ACTA1,AREG,RHOB,BMP2,CD151,COL3A1,EFNB2,EPHA2,EPHA4,ITGB1,ITGB3,MYL2,PGR,SFRP1,SOX9,STC1,TNNC1,TNNI3,VEGFA,WT1,HMGA2,TCAP,NTN1,FEM1B,PALS1,GORAB,XIRP2,CRB2
7_Member	GO Biological Processes	GO:0002009	morphogenesis of an epithelium	-5.16564	-2.83523	17/443	374,388,650,977,1948,1969,2043,5241,6422,6662,7422,7490,8557,9423,10116,64398,92344	AREG,RHOB,BMP2,CD151,EFNB2,EPHA2,EPHA4,PGR,SFRP1,SOX9,VEGFA,WT1,TCAP,NTN1,FEM1B,PALS1,GORAB
7_Member	GO Biological Processes	GO:0030879	mammary gland development	-5.1313	-2.80762	9/123	374,1969,3099,3664,5241,6662,7422,8862,9423	AREG,EPHA2,HK2,IRF6,PGR,SOX9,VEGFA,APLN,NTN1
7_Member	GO Biological Processes	GO:0060562	epithelial tube morphogenesis	-4.51941	-2.34186	13/307	374,388,650,1948,1969,2043,5241,6422,6662,7422,7490,8557,9423	AREG,RHOB,BMP2,EFNB2,EPHA2,EPHA4,PGR,SFRP1,SOX9,VEGFA,WT1,TCAP,NTN1
7_Member	GO Biological Processes	GO:0061138	morphogenesis of a branching epithelium	-4.18053	-2.10886	9/162	374,650,1969,5241,6422,6662,7422,7490,10116	AREG,BMP2,EPHA2,PGR,SFRP1,SOX9,VEGFA,WT1,FEM1B
7_Member	GO Biological Processes	GO:0001763	morphogenesis of a branching structure	-4.00023	-1.96573	9/171	374,650,1969,5241,6422,6662,7422,7490,10116	AREG,BMP2,EPHA2,PGR,SFRP1,SOX9,VEGFA,WT1,FEM1B
7_Member	GO Biological Processes	GO:0022612	gland morphogenesis	-3.96258	-1.93826	7/101	374,1969,5241,6422,6662,9423,10116	AREG,EPHA2,PGR,SFRP1,SOX9,NTN1,FEM1B
7_Member	GO Biological Processes	GO:0048732	gland development	-3.91909	-1.89977	14/401	374,650,1054,1969,3099,3664,5241,6422,6662,7422,7490,8862,9423,10116	AREG,BMP2,CEBPG,EPHA2,HK2,IRF6,PGR,SFRP1,SOX9,VEGFA,WT1,APLN,NTN1,FEM1B
7_Member	GO Biological Processes	GO:0060603	mammary gland duct morphogenesis	-3.60793	-1.67175	4/29	374,1969,5241,9423	AREG,EPHA2,PGR,NTN1
7_Member	GO Biological Processes	GO:0061180	mammary gland epithelium development	-3.44408	-1.54133	5/57	374,1969,3664,5241,9423	AREG,EPHA2,IRF6,PGR,NTN1
7_Member	GO Biological Processes	GO:0048754	branching morphogenesis of an epithelial tube	-3.22924	-1.38045	7/133	374,650,1969,5241,6662,7422,7490	AREG,BMP2,EPHA2,PGR,SOX9,VEGFA,WT1
7_Member	GO Biological Processes	GO:0060443	mammary gland morphogenesis	-3.02189	-1.24513	4/41	374,1969,5241,9423	AREG,EPHA2,PGR,NTN1
7_Member	GO Biological Processes	GO:0060444	branching involved in mammary gland duct morphogenesis	-2.79488	-1.07824	3/22	374,1969,5241	AREG,EPHA2,PGR
7_Member	GO Biological Processes	GO:0001570	vasculogenesis	-2.19196	-0.630558	4/69	1969,7137,7422,7490	EPHA2,TNNI3,VEGFA,WT1
7_Member	GO Biological Processes	GO:0030855	epithelial cell differentiation	-2.17998	-0.621459	13/549	650,1969,3664,5230,5241,6662,6781,7357,7422,7490,10083,10116,57110	BMP2,EPHA2,IRF6,PGK1,PGR,SOX9,STC1,UGCG,VEGFA,WT1,USH1C,FEM1B,PLAAT1
8_Summary	Reactome Gene Sets	R-HSA-397014	Muscle contraction	-10.296	-6.93752	17/197	58,88,477,844,859,1674,3753,3761,3777,4633,4878,6330,7134,7137,7169,8291,8557,384,3764,5606,23336,102723475,58529,6445,1573,5999,6781,8862,84525,745,1264,2023,4879,27242,51196,6387,7422,100506658,6533,6566,1329,7388,23439,5500,650,1281,129446,2050,6662,23768,2743,10083	ACTA1,ACTN2,ATP1A2,CASQ1,CAV3,DES,KCNE1,KCNJ4,KCNK3,MYL2,NPPA,SCN4B,TNNC1,TNNI3,TPM2,DYSF,TCAP,ARG2,KCNJ8,MAP2K3,SYNM,LOC102723475,MYOZ1,SGCG,CYP2J2,RGS4,STC1,APLN,HOPX,MYRF,CNN1,ENO1,NPPB,TNFRSF21,PLCE1,CXCL12,VEGFA,OCLN,SLC6A6,SLC16A1,COX5B,UQCRH,ATP1B4,PPP1CB,BMP2,COL3A1,XIRP2,EPHB4,SOX9,FLRT2,GLRB,USH1C
8_Member	Reactome Gene Sets	R-HSA-397014	Muscle contraction	-10.296	-6.93752	17/197	58,88,477,844,859,1674,3753,3761,3777,4633,4878,6330,7134,7137,7169,8291,8557	ACTA1,ACTN2,ATP1A2,CASQ1,CAV3,DES,KCNE1,KCNJ4,KCNK3,MYL2,NPPA,SCN4B,TNNC1,TNNI3,TPM2,DYSF,TCAP
8_Member	GO Biological Processes	GO:0006941	striated muscle contraction	-9.91237	-6.65084	13/106	384,477,859,3753,3764,4633,5606,6330,7134,7137,8557,23336,102723475	ARG2,ATP1A2,CAV3,KCNE1,KCNJ8,MYL2,MAP2K3,SCN4B,TNNC1,TNNI3,TCAP,SYNM,LOC102723475
8_Member	GO Biological Processes	GO:0003012	muscle system process	-9.60462	-6.39744	19/281	58,88,384,477,859,1674,3753,3764,4633,4878,5606,6330,7134,7137,7169,8557,23336,58529,102723475	ACTA1,ACTN2,ARG2,ATP1A2,CAV3,DES,KCNE1,KCNJ8,MYL2,NPPA,MAP2K3,SCN4B,TNNC1,TNNI3,TPM2,TCAP,SYNM,MYOZ1,LOC102723475
8_Member	GO Biological Processes	GO:0060047	heart contraction	-9.5122	-6.32985	12/92	477,859,3753,3764,4633,5606,6330,6445,7134,7137,8557,102723475	ATP1A2,CAV3,KCNE1,KCNJ8,MYL2,MAP2K3,SCN4B,SGCG,TNNC1,TNNI3,TCAP,LOC102723475
8_Member	GO Biological Processes	GO:0006936	muscle contraction	-9.33289	-6.22066	17/227	58,88,384,477,859,1674,3753,3764,4633,5606,6330,7134,7137,7169,8557,23336,102723475	ACTA1,ACTN2,ARG2,ATP1A2,CAV3,DES,KCNE1,KCNJ8,MYL2,MAP2K3,SCN4B,TNNC1,TNNI3,TPM2,TCAP,SYNM,LOC102723475
8_Member	GO Biological Processes	GO:0060048	cardiac muscle contraction	-9.32868	-6.22066	11/75	477,859,3753,3764,4633,5606,6330,7134,7137,8557,102723475	ATP1A2,CAV3,KCNE1,KCNJ8,MYL2,MAP2K3,SCN4B,TNNC1,TNNI3,TCAP,LOC102723475
8_Member	GO Biological Processes	GO:0003015	heart process	-8.69271	-5.70224	12/108	477,859,3753,3764,4633,5606,6330,6445,7134,7137,8557,102723475	ATP1A2,CAV3,KCNE1,KCNJ8,MYL2,MAP2K3,SCN4B,SGCG,TNNC1,TNNI3,TCAP,LOC102723475
8_Member	Reactome Gene Sets	R-HSA-390522	Striated Muscle Contraction	-8.43749	-5.50502	8/36	58,88,1674,4633,7134,7137,7169,8557	ACTA1,ACTN2,DES,MYL2,TNNC1,TNNI3,TPM2,TCAP
8_Member	WikiPathways	WP383	Striated muscle contraction pathway	-8.23709	-5.34354	8/38	58,88,1674,4633,7134,7137,7169,8557	ACTA1,ACTN2,DES,MYL2,TNNC1,TNNI3,TPM2,TCAP
8_Member	GO Biological Processes	GO:0008016	regulation of heart contraction	-7.23147	-4.44705	14/207	477,859,1573,1674,3753,4633,4878,5999,6330,6781,7137,8862,84525,102723475	ATP1A2,CAV3,CYP2J2,DES,KCNE1,MYL2,NPPA,RGS4,SCN4B,STC1,TNNI3,APLN,HOPX,LOC102723475
8_Member	GO Biological Processes	GO:0044057	regulation of system process	-6.52388	-3.83444	22/573	477,745,844,859,1264,1573,1674,2023,3753,4633,4878,4879,5999,6330,6781,7134,7137,8862,27242,51196,84525,102723475	ATP1A2,MYRF,CASQ1,CAV3,CNN1,CYP2J2,DES,ENO1,KCNE1,MYL2,NPPA,NPPB,RGS4,SCN4B,STC1,TNNC1,TNNI3,APLN,TNFRSF21,PLCE1,HOPX,LOC102723475
8_Member	GO Biological Processes	GO:0008015	blood circulation	-6.41808	-3.75131	18/400	477,859,3753,3764,4633,4878,4879,5606,6330,6387,6445,7134,7137,7422,8557,8862,100506658,102723475	ATP1A2,CAV3,KCNE1,KCNJ8,MYL2,NPPA,NPPB,MAP2K3,SCN4B,CXCL12,SGCG,TNNC1,TNNI3,VEGFA,TCAP,APLN,OCLN,LOC102723475
8_Member	GO Biological Processes	GO:0003013	circulatory system process	-6.36565	-3.72737	20/492	477,859,3753,3764,4633,4878,4879,5606,6330,6387,6445,6533,6566,7134,7137,7422,8557,8862,100506658,102723475	ATP1A2,CAV3,KCNE1,KCNJ8,MYL2,NPPA,NPPB,MAP2K3,SCN4B,CXCL12,SGCG,SLC6A6,SLC16A1,TNNC1,TNNI3,VEGFA,TCAP,APLN,OCLN,LOC102723475
8_Member	GO Biological Processes	GO:1903522	regulation of blood circulation	-6.10505	-3.51893	14/256	477,859,1573,1674,3753,4633,4878,5999,6330,6781,7137,8862,84525,102723475	ATP1A2,CAV3,CYP2J2,DES,KCNE1,MYL2,NPPA,RGS4,SCN4B,STC1,TNNI3,APLN,HOPX,LOC102723475
8_Member	KEGG Pathway	hsa04260	Cardiac muscle contraction	-5.35697	-2.97243	8/87	477,1329,4633,7134,7137,7169,7388,23439	ATP1A2,COX5B,MYL2,TNNC1,TNNI3,TPM2,UQCRH,ATP1B4
8_Member	KEGG Pathway	hsa04261	Adrenergic signaling in cardiomyocytes	-5.27544	-2.91336	10/150	477,3753,4633,5500,6330,7134,7137,7169,23439,102723475	ATP1A2,KCNE1,MYL2,PPP1CB,SCN4B,TNNC1,TNNI3,TPM2,ATP1B4,LOC102723475
8_Member	GO Biological Processes	GO:0060415	muscle tissue morphogenesis	-4.8754	-2.61096	7/73	650,1281,4633,7134,7137,8557,129446	BMP2,COL3A1,MYL2,TNNC1,TNNI3,TCAP,XIRP2
8_Member	GO Biological Processes	GO:0048644	muscle organ morphogenesis	-4.61315	-2.41607	7/80	650,1281,4633,7134,7137,8557,129446	BMP2,COL3A1,MYL2,TNNC1,TNNI3,TCAP,XIRP2
8_Member	GO Biological Processes	GO:0055008	cardiac muscle tissue morphogenesis	-4.3573	-2.21634	6/60	650,4633,7134,7137,8557,129446	BMP2,MYL2,TNNC1,TNNI3,TCAP,XIRP2
8_Member	GO Molecular Functions	GO:0008307	structural constituent of muscle	-4.07942	-2.02382	5/42	88,4633,7169,8557,23336	ACTN2,MYL2,TPM2,TCAP,SYNM
8_Member	GO Biological Processes	GO:0003007	heart morphogenesis	-4.0577	-2.01278	11/250	650,859,2050,4633,6662,7134,7137,7422,8557,23768,129446	BMP2,CAV3,EPHB4,MYL2,SOX9,TNNC1,TNNI3,VEGFA,TCAP,FLRT2,XIRP2
8_Member	GO Biological Processes	GO:0003009	skeletal muscle contraction	-3.60793	-1.67175	4/29	7134,7137,8557,23336	TNNC1,TNNI3,TCAP,SYNM
8_Member	GO Biological Processes	GO:0050879	multicellular organismal movement	-2.98206	-1.21653	4/42	7134,7137,8557,23336	TNNC1,TNNI3,TCAP,SYNM
8_Member	GO Biological Processes	GO:0050881	musculoskeletal movement	-2.98206	-1.21653	4/42	7134,7137,8557,23336	TNNC1,TNNI3,TCAP,SYNM
8_Member	GO Biological Processes	GO:0003229	ventricular cardiac muscle tissue development	-2.51679	-0.875741	4/56	4633,7134,7137,84525	MYL2,TNNC1,TNNI3,HOPX
8_Member	GO Biological Processes	GO:0050905	neuromuscular process	-2.42378	-0.807666	6/138	2743,7134,7137,8557,10083,23336	GLRB,TNNC1,TNNI3,TCAP,USH1C,SYNM
8_Member	GO Biological Processes	GO:0003205	cardiac chamber development	-2.02903	-0.511445	6/167	650,859,4633,7134,7137,129446	BMP2,CAV3,MYL2,TNNC1,TNNI3,XIRP2
9_Summary	Hallmark Gene Sets	M5890	HALLMARK TNFA SIGNALING VIA NFKB	-10.1921	-6.86846	17/200	374,388,650,1316,1647,1843,5328,5606,5791,5971,7422,8553,22822,24145,24147,51278,56937	AREG,RHOB,BMP2,KLF6,GADD45A,DUSP1,PLAU,MAP2K3,PTPRE,RELB,VEGFA,BHLHE40,PHLDA1,PANX1,FJX1,IER5,PMEPA1
9_Member	Hallmark Gene Sets	M5890	HALLMARK TNFA SIGNALING VIA NFKB	-10.1921	-6.86846	17/200	374,388,650,1316,1647,1843,5328,5606,5791,5971,7422,8553,22822,24145,24147,51278,56937	AREG,RHOB,BMP2,KLF6,GADD45A,DUSP1,PLAU,MAP2K3,PTPRE,RELB,VEGFA,BHLHE40,PHLDA1,PANX1,FJX1,IER5,PMEPA1
10_Summary	GO Biological Processes	GO:0045765	regulation of angiogenesis	-8.90805	-5.8854	20/345	306,388,728,1647,1969,2752,3099,3688,4879,5230,5740,6237,6422,7060,7422,8091,10457,22846,23554,64102,3690,5606,5801,6662,6781,7114,58,374,961,1006,5328,6387,51196	ANXA3,RHOB,C5AR1,GADD45A,EPHA2,GLUL,HK2,ITGB1,NPPB,PGK1,PTGIS,RRAS,SFRP1,THBS4,VEGFA,HMGA2,GPNMB,VASH1,TSPAN12,TNMD,ITGB3,MAP2K3,PTPRR,SOX9,STC1,TMSB4X,ACTA1,AREG,CD47,CDH8,PLAU,CXCL12,PLCE1
10_Member	GO Biological Processes	GO:0045765	regulation of angiogenesis	-8.90805	-5.8854	20/345	306,388,728,1647,1969,2752,3099,3688,4879,5230,5740,6237,6422,7060,7422,8091,10457,22846,23554,64102	ANXA3,RHOB,C5AR1,GADD45A,EPHA2,GLUL,HK2,ITGB1,NPPB,PGK1,PTGIS,RRAS,SFRP1,THBS4,VEGFA,HMGA2,GPNMB,VASH1,TSPAN12,TNMD
10_Member	GO Biological Processes	GO:1901342	regulation of vasculature development	-8.77912	-5.77286	20/351	306,388,728,1647,1969,2752,3099,3688,4879,5230,5740,6237,6422,7060,7422,8091,10457,22846,23554,64102	ANXA3,RHOB,C5AR1,GADD45A,EPHA2,GLUL,HK2,ITGB1,NPPB,PGK1,PTGIS,RRAS,SFRP1,THBS4,VEGFA,HMGA2,GPNMB,VASH1,TSPAN12,TNMD
10_Member	GO Biological Processes	GO:0010632	regulation of epithelial cell migration	-5.4691	-3.0649	14/290	306,388,1647,1969,2752,3690,5606,5801,6237,6662,6781,7114,7422,22846	ANXA3,RHOB,GADD45A,EPHA2,GLUL,ITGB3,MAP2K3,PTPRR,RRAS,SOX9,STC1,TMSB4X,VEGFA,VASH1
10_Member	GO Biological Processes	GO:0010594	regulation of endothelial cell migration	-5.1079	-2.79085	12/230	306,388,1647,1969,2752,3690,5606,6237,6781,7114,7422,22846	ANXA3,RHOB,GADD45A,EPHA2,GLUL,ITGB3,MAP2K3,RRAS,STC1,TMSB4X,VEGFA,VASH1
10_Member	GO Biological Processes	GO:0045766	positive regulation of angiogenesis	-3.77729	-1.79451	9/183	306,388,728,3099,3688,5740,6237,7422,8091	ANXA3,RHOB,C5AR1,HK2,ITGB1,PTGIS,RRAS,VEGFA,HMGA2
10_Member	GO Biological Processes	GO:1904018	positive regulation of vasculature development	-3.77729	-1.79451	9/183	306,388,728,3099,3688,5740,6237,7422,8091	ANXA3,RHOB,C5AR1,HK2,ITGB1,PTGIS,RRAS,VEGFA,HMGA2
10_Member	GO Biological Processes	GO:0010595	positive regulation of endothelial cell migration	-3.26853	-1.41069	7/131	306,388,3690,5606,6237,7114,7422	ANXA3,RHOB,ITGB3,MAP2K3,RRAS,TMSB4X,VEGFA
10_Member	GO Biological Processes	GO:0010634	positive regulation of epithelial cell migration	-3.22326	-1.37559	8/174	306,388,3690,5606,6237,6662,7114,7422	ANXA3,RHOB,ITGB3,MAP2K3,RRAS,SOX9,TMSB4X,VEGFA
10_Member	WikiPathways	WP5087	Malignant pleural mesothelioma	-2.47071	-0.846003	12/447	58,374,961,1006,1969,3688,3690,5328,5606,6387,6422,7422	ACTA1,AREG,CD47,CDH8,EPHA2,ITGB1,ITGB3,PLAU,MAP2K3,CXCL12,SFRP1,VEGFA
10_Member	GO Biological Processes	GO:0043535	regulation of blood vessel endothelial cell migration	-2.24851	-0.670959	6/150	1647,1969,5606,7114,7422,22846	GADD45A,EPHA2,MAP2K3,TMSB4X,VEGFA,VASH1
10_Member	KEGG Pathway	hsa04015	Rap1 signaling pathway	-2.11525	-0.577451	7/210	1969,3688,3690,5606,6237,7422,51196	EPHA2,ITGB1,ITGB3,MAP2K3,RRAS,VEGFA,PLCE1
11_Summary	Canonical Pathways	M255	PID HIF1 TFPATHWAY	-8.67575	-5.70052	10/66	664,2023,3099,3939,5230,6095,6387,7422,8553,79365,3485,6566,3777,8091,114088	BNIP3,ENO1,HK2,LDHA,PGK1,RORA,CXCL12,VEGFA,BHLHE40,BHLHE41,IGFBP2,SLC16A1,KCNK3,HMGA2,TRIM9
11_Member	Canonical Pathways	M255	PID HIF1 TFPATHWAY	-8.67575	-5.70052	10/66	664,2023,3099,3939,5230,6095,6387,7422,8553,79365	BNIP3,ENO1,HK2,LDHA,PGK1,RORA,CXCL12,VEGFA,BHLHE40,BHLHE41
11_Member	WikiPathways	WP3614	Photodynamic therapy-induced HIF-1 survival signaling	-5.60082	-3.18023	6/37	664,3485,3939,5230,6566,7422	BNIP3,IGFBP2,LDHA,PGK1,SLC16A1,VEGFA
11_Member	Canonical Pathways	M44	PID HIF2PATHWAY	-2.24645	-0.670959	3/34	5230,7422,8553	PGK1,VEGFA,BHLHE40
11_Member	WikiPathways	WP5094	Orexin receptor pathway	-2.18072	-0.621459	6/155	3777,3939,7422,8091,8553,114088	KCNK3,LDHA,VEGFA,HMGA2,BHLHE40,TRIM9
12_Summary	GO Biological Processes	GO:0035239	tube morphogenesis	-8.45257	-5.50631	27/661	374,388,650,1281,1464,1948,1969,2043,2050,2752,3688,3690,4240,5241,5396,6095,6376,6422,6662,7137,7422,7490,8557,8862,9423,22846,23554,196,201294,977,1111,1164,3664,6781,8091,10763	AREG,RHOB,BMP2,COL3A1,CSPG4,EFNB2,EPHA2,EPHA4,EPHB4,GLUL,ITGB1,ITGB3,MFGE8,PGR,PRRX1,RORA,CX3CL1,SFRP1,SOX9,TNNI3,VEGFA,WT1,TCAP,APLN,NTN1,VASH1,TSPAN12,AHR,UNC13D,CD151,CHEK1,CKS2,IRF6,STC1,HMGA2,NES
12_Member	GO Biological Processes	GO:0035239	tube morphogenesis	-8.45257	-5.50631	27/661	374,388,650,1281,1464,1948,1969,2043,2050,2752,3688,3690,4240,5241,5396,6095,6376,6422,6662,7137,7422,7490,8557,8862,9423,22846,23554	AREG,RHOB,BMP2,COL3A1,CSPG4,EFNB2,EPHA2,EPHA4,EPHB4,GLUL,ITGB1,ITGB3,MFGE8,PGR,PRRX1,RORA,CX3CL1,SFRP1,SOX9,TNNI3,VEGFA,WT1,TCAP,APLN,NTN1,VASH1,TSPAN12
12_Member	GO Biological Processes	GO:0048514	blood vessel morphogenesis	-6.7942	-4.04677	19/419	388,1281,1464,1948,1969,2050,2752,3688,3690,4240,5396,6095,6376,7137,7422,7490,8862,22846,23554	RHOB,COL3A1,CSPG4,EFNB2,EPHA2,EPHB4,GLUL,ITGB1,ITGB3,MFGE8,PRRX1,RORA,CX3CL1,TNNI3,VEGFA,WT1,APLN,VASH1,TSPAN12
12_Member	GO Biological Processes	GO:0001944	vasculature development	-6.52775	-3.83444	21/526	196,388,1281,1464,1948,1969,2050,2752,3688,3690,4240,5396,6095,6376,7137,7422,7490,8862,22846,23554,201294	AHR,RHOB,COL3A1,CSPG4,EFNB2,EPHA2,EPHB4,GLUL,ITGB1,ITGB3,MFGE8,PRRX1,RORA,CX3CL1,TNNI3,VEGFA,WT1,APLN,VASH1,TSPAN12,UNC13D
12_Member	GO Biological Processes	GO:0001568	blood vessel development	-6.21579	-3.60424	20/503	196,388,1281,1464,1948,1969,2050,2752,3688,3690,4240,5396,6095,6376,7137,7422,7490,8862,22846,23554	AHR,RHOB,COL3A1,CSPG4,EFNB2,EPHA2,EPHB4,GLUL,ITGB1,ITGB3,MFGE8,PRRX1,RORA,CX3CL1,TNNI3,VEGFA,WT1,APLN,VASH1,TSPAN12
12_Member	GO Biological Processes	GO:0001525	angiogenesis	-5.6441	-3.21079	15/321	388,1464,1948,1969,2050,2752,3688,3690,4240,6095,6376,7422,8862,22846,23554	RHOB,CSPG4,EFNB2,EPHA2,EPHB4,GLUL,ITGB1,ITGB3,MFGE8,RORA,CX3CL1,VEGFA,APLN,VASH1,TSPAN12
12_Member	GO Biological Processes	GO:0008283	cell population proliferation	-4.068	-2.01954	16/489	374,650,977,1111,1164,1281,1464,1969,2752,3664,6095,6376,6662,6781,8091,10763	AREG,BMP2,CD151,CHEK1,CKS2,COL3A1,CSPG4,EPHA2,GLUL,IRF6,RORA,CX3CL1,SOX9,STC1,HMGA2,NES
13_Summary	Hallmark Gene Sets	M5947	HALLMARK IL2 STAT5 SIGNALING	-8.34205	-5.42294	15/199	196,388,650,1316,2027,3099,3664,5033,6095,7371,8553,22822,23075,27242,84525,1647,5740,83881	AHR,RHOB,BMP2,KLF6,ENO3,HK2,IRF6,P4HA1,RORA,UCK2,BHLHE40,PHLDA1,SWAP70,TNFRSF21,HOPX,GADD45A,PTGIS,MIXL1
13_Member	Hallmark Gene Sets	M5947	HALLMARK IL2 STAT5 SIGNALING	-8.34205	-5.42294	15/199	196,388,650,1316,2027,3099,3664,5033,6095,7371,8553,22822,23075,27242,84525	AHR,RHOB,BMP2,KLF6,ENO3,HK2,IRF6,P4HA1,RORA,UCK2,BHLHE40,PHLDA1,SWAP70,TNFRSF21,HOPX
13_Member	WikiPathways	WP236	Adipogenesis	-3.26853	-1.41069	7/131	196,650,1316,1647,5740,6095,83881	AHR,BMP2,KLF6,GADD45A,PTGIS,RORA,MIXL1
14_Summary	GO Biological Processes	GO:0032989	cellular component morphogenesis	-7.77545	-4.93988	24/573	58,88,844,1272,1948,1969,2043,2050,3688,4633,6387,7422,8128,8557,9423,10160,10678,10763,23768,54437,58529,64398,139065,152330,388,1281,1297,1809,3690,6169,6171,6237,6330,7277,7316,51065,728,5328,6376,10457,123920,27242,374,10083,79789,1006,6781,5396,6422,51196,55714,100506658	ACTA1,ACTN2,CASQ1,CNTN1,EFNB2,EPHA2,EPHA4,EPHB4,ITGB1,MYL2,CXCL12,VEGFA,ST8SIA2,TCAP,NTN1,FARP1,B3GNT2,NES,FLRT2,SEMA5B,MYOZ1,PALS1,SLITRK4,CNTN4,RHOB,COL3A1,COL9A1,DPYSL3,ITGB3,RPL38,RPL41,RRAS,SCN4B,TUBA4A,UBC,RPS27L,C5AR1,PLAU,CX3CL1,GPNMB,CMTM3,TNFRSF21,AREG,USH1C,CLMN,CDH8,STC1,PRRX1,SFRP1,PLCE1,TENM3,OCLN
14_Member	GO Biological Processes	GO:0032989	cellular component morphogenesis	-7.77545	-4.93988	24/573	58,88,844,1272,1948,1969,2043,2050,3688,4633,6387,7422,8128,8557,9423,10160,10678,10763,23768,54437,58529,64398,139065,152330	ACTA1,ACTN2,CASQ1,CNTN1,EFNB2,EPHA2,EPHA4,EPHB4,ITGB1,MYL2,CXCL12,VEGFA,ST8SIA2,TCAP,NTN1,FARP1,B3GNT2,NES,FLRT2,SEMA5B,MYOZ1,PALS1,SLITRK4,CNTN4
14_Member	Reactome Gene Sets	R-HSA-422475	Axon guidance	-6.18804	-3.58926	21/552	388,1272,1281,1297,1809,1948,1969,2043,2050,3688,3690,6169,6171,6237,6330,6387,7277,7316,8128,9423,51065	RHOB,CNTN1,COL3A1,COL9A1,DPYSL3,EFNB2,EPHA2,EPHA4,EPHB4,ITGB1,ITGB3,RPL38,RPL41,RRAS,SCN4B,CXCL12,TUBA4A,UBC,ST8SIA2,NTN1,RPS27L
14_Member	Reactome Gene Sets	R-HSA-9675108	Nervous system development	-5.88123	-3.36268	21/577	388,1272,1281,1297,1809,1948,1969,2043,2050,3688,3690,6169,6171,6237,6330,6387,7277,7316,8128,9423,51065	RHOB,CNTN1,COL3A1,COL9A1,DPYSL3,EFNB2,EPHA2,EPHA4,EPHB4,ITGB1,ITGB3,RPL38,RPL41,RRAS,SCN4B,CXCL12,TUBA4A,UBC,ST8SIA2,NTN1,RPS27L
14_Member	GO Biological Processes	GO:0007411	axon guidance	-5.16568	-2.83523	12/227	1272,1948,1969,2043,2050,6387,7422,9423,10678,23768,54437,152330	CNTN1,EFNB2,EPHA2,EPHA4,EPHB4,CXCL12,VEGFA,NTN1,B3GNT2,FLRT2,SEMA5B,CNTN4
14_Member	GO Biological Processes	GO:0097485	neuron projection guidance	-5.14632	-2.81928	12/228	1272,1948,1969,2043,2050,6387,7422,9423,10678,23768,54437,152330	CNTN1,EFNB2,EPHA2,EPHA4,EPHB4,CXCL12,VEGFA,NTN1,B3GNT2,FLRT2,SEMA5B,CNTN4
14_Member	GO Biological Processes	GO:0006935	chemotaxis	-4.98692	-2.69543	18/506	728,1272,1948,1969,2043,2050,3690,5328,6376,6387,7422,9423,10457,10678,23768,54437,123920,152330	C5AR1,CNTN1,EFNB2,EPHA2,EPHA4,EPHB4,ITGB3,PLAU,CX3CL1,CXCL12,VEGFA,NTN1,GPNMB,B3GNT2,FLRT2,SEMA5B,CMTM3,CNTN4
14_Member	GO Biological Processes	GO:0042330	taxis	-4.94099	-2.66173	18/510	728,1272,1948,1969,2043,2050,3690,5328,6376,6387,7422,9423,10457,10678,23768,54437,123920,152330	C5AR1,CNTN1,EFNB2,EPHA2,EPHA4,EPHB4,ITGB3,PLAU,CX3CL1,CXCL12,VEGFA,NTN1,GPNMB,B3GNT2,FLRT2,SEMA5B,CMTM3,CNTN4
14_Member	GO Biological Processes	GO:0048858	cell projection morphogenesis	-4.91702	-2.6492	17/463	1272,1948,1969,2043,2050,3688,6387,7422,8128,9423,10160,10678,10763,23768,54437,139065,152330	CNTN1,EFNB2,EPHA2,EPHA4,EPHB4,ITGB1,CXCL12,VEGFA,ST8SIA2,NTN1,FARP1,B3GNT2,NES,FLRT2,SEMA5B,SLITRK4,CNTN4
14_Member	GO Biological Processes	GO:0061564	axon development	-4.76717	-2.52339	15/380	1272,1948,1969,2043,2050,3688,6387,7422,9423,10678,23768,27242,54437,139065,152330	CNTN1,EFNB2,EPHA2,EPHA4,EPHB4,ITGB1,CXCL12,VEGFA,NTN1,B3GNT2,FLRT2,TNFRSF21,SEMA5B,SLITRK4,CNTN4
14_Member	GO Biological Processes	GO:0032990	cell part morphogenesis	-4.69404	-2.46593	17/482	1272,1948,1969,2043,2050,3688,6387,7422,8128,9423,10160,10678,10763,23768,54437,139065,152330	CNTN1,EFNB2,EPHA2,EPHA4,EPHB4,ITGB1,CXCL12,VEGFA,ST8SIA2,NTN1,FARP1,B3GNT2,NES,FLRT2,SEMA5B,SLITRK4,CNTN4
14_Member	GO Biological Processes	GO:0031175	neuron projection development	-4.66949	-2.45739	20/639	374,1272,1948,1969,2043,2050,3688,6387,7422,8128,9423,10083,10160,10678,23768,27242,54437,79789,139065,152330	AREG,CNTN1,EFNB2,EPHA2,EPHA4,EPHB4,ITGB1,CXCL12,VEGFA,ST8SIA2,NTN1,USH1C,FARP1,B3GNT2,FLRT2,TNFRSF21,SEMA5B,CLMN,SLITRK4,CNTN4
14_Member	GO Biological Processes	GO:0007409	axonogenesis	-4.66031	-2.45314	14/342	1272,1948,1969,2043,2050,3688,6387,7422,9423,10678,23768,54437,139065,152330	CNTN1,EFNB2,EPHA2,EPHA4,EPHB4,ITGB1,CXCL12,VEGFA,NTN1,B3GNT2,FLRT2,SEMA5B,SLITRK4,CNTN4
14_Member	GO Biological Processes	GO:0048812	neuron projection morphogenesis	-4.43574	-2.27458	16/455	1272,1948,1969,2043,2050,3688,6387,7422,8128,9423,10160,10678,23768,54437,139065,152330	CNTN1,EFNB2,EPHA2,EPHA4,EPHB4,ITGB1,CXCL12,VEGFA,ST8SIA2,NTN1,FARP1,B3GNT2,FLRT2,SEMA5B,SLITRK4,CNTN4
14_Member	GO Biological Processes	GO:0120039	plasma membrane bounded cell projection morphogenesis	-4.39052	-2.24069	16/459	1272,1948,1969,2043,2050,3688,6387,7422,8128,9423,10160,10678,23768,54437,139065,152330	CNTN1,EFNB2,EPHA2,EPHA4,EPHB4,ITGB1,CXCL12,VEGFA,ST8SIA2,NTN1,FARP1,B3GNT2,FLRT2,SEMA5B,SLITRK4,CNTN4
14_Member	GO Biological Processes	GO:0048667	cell morphogenesis involved in neuron differentiation	-4.37556	-2.23019	15/411	1272,1948,1969,2043,2050,3688,6387,7422,9423,10160,10678,23768,54437,139065,152330	CNTN1,EFNB2,EPHA2,EPHA4,EPHB4,ITGB1,CXCL12,VEGFA,NTN1,FARP1,B3GNT2,FLRT2,SEMA5B,SLITRK4,CNTN4
14_Member	GO Biological Processes	GO:0000902	cell morphogenesis	-4.35449	-2.21572	20/673	1006,1272,1948,1969,2043,2050,3688,3690,6387,6781,7422,8128,9423,10160,10678,10763,23768,54437,139065,152330	CDH8,CNTN1,EFNB2,EPHA2,EPHA4,EPHB4,ITGB1,ITGB3,CXCL12,STC1,VEGFA,ST8SIA2,NTN1,FARP1,B3GNT2,NES,FLRT2,SEMA5B,SLITRK4,CNTN4
14_Member	GO Biological Processes	GO:0000904	cell morphogenesis involved in differentiation	-4.26226	-2.15097	17/522	1272,1948,1969,2043,2050,3688,3690,6387,6781,7422,9423,10160,10678,23768,54437,139065,152330	CNTN1,EFNB2,EPHA2,EPHA4,EPHB4,ITGB1,ITGB3,CXCL12,STC1,VEGFA,NTN1,FARP1,B3GNT2,FLRT2,SEMA5B,SLITRK4,CNTN4
14_Member	KEGG Pathway	hsa04360	Axon guidance	-3.79516	-1.80314	9/182	1948,1969,2043,2050,3688,6237,6387,9423,54437	EFNB2,EPHA2,EPHA4,EPHB4,ITGB1,RRAS,CXCL12,NTN1,SEMA5B
14_Member	GO Biological Processes	GO:0120035	regulation of plasma membrane bounded cell projection organization	-2.92388	-1.17117	16/622	1272,1809,1948,1969,2043,5396,6376,6387,6422,7422,9423,10083,51196,54437,55714,100506658	CNTN1,DPYSL3,EFNB2,EPHA2,EPHA4,PRRX1,CX3CL1,CXCL12,SFRP1,VEGFA,NTN1,USH1C,PLCE1,SEMA5B,TENM3,OCLN
14_Member	GO Biological Processes	GO:0031344	regulation of cell projection organization	-2.80447	-1.08452	16/639	1272,1809,1948,1969,2043,5396,6376,6387,6422,7422,9423,10083,51196,54437,55714,100506658	CNTN1,DPYSL3,EFNB2,EPHA2,EPHA4,PRRX1,CX3CL1,CXCL12,SFRP1,VEGFA,NTN1,USH1C,PLCE1,SEMA5B,TENM3,OCLN
14_Member	GO Biological Processes	GO:0010975	regulation of neuron projection development	-2.59806	-0.932755	12/431	1272,1809,1948,2043,5396,6376,6387,6422,7422,9423,54437,55714	CNTN1,DPYSL3,EFNB2,EPHA4,PRRX1,CX3CL1,CXCL12,SFRP1,VEGFA,NTN1,SEMA5B,TENM3
14_Member	GO Biological Processes	GO:0031346	positive regulation of cell projection organization	-2.40661	-0.792459	10/341	1272,1809,2043,6376,6387,7422,9423,51196,55714,100506658	CNTN1,DPYSL3,EPHA4,CX3CL1,CXCL12,VEGFA,NTN1,PLCE1,TENM3,OCLN
15_Summary	GO Molecular Functions	GO:0051373	FATZ binding	-7.19658	-4.43105	4/5	88,8557,58529,91977,3753	ACTN2,TCAP,MYOZ1,MYOZ3,KCNE1
15_Member	GO Molecular Functions	GO:0051373	FATZ binding	-7.19658	-4.43105	4/5	88,8557,58529,91977	ACTN2,TCAP,MYOZ1,MYOZ3
15_Member	GO Molecular Functions	GO:0031433	telethonin binding	-4.38667	-2.23908	3/7	3753,58529,91977	KCNE1,MYOZ1,MYOZ3
16_Summary	GO Molecular Functions	GO:0005178	integrin binding	-6.88774	-4.13135	12/156	88,977,1281,3679,3688,3690,4240,6376,6387,7060,10457,10518,1674,4633,6445,7134,7137,7169,27231,859,967,5328,5500,6237,7422,22800,51196,54776,7114,81624,961,4345,1297,22987,1464,54829,9672,9806,1969,6169,8091,286204,477,1948,9074,1006,92421,6566,9123,5606,650,1272,6330,7277	ACTN2,CD151,COL3A1,ITGA7,ITGB1,ITGB3,MFGE8,CX3CL1,CXCL12,THBS4,GPNMB,CIB2,DES,MYL2,SGCG,TNNC1,TNNI3,TPM2,NMRK2,CAV3,CD63,PLAU,PPP1CB,RRAS,VEGFA,RRAS2,PLCE1,PPP1R12C,TMSB4X,DIAPH3,CD47,CD200,COL9A1,SV2C,CSPG4,ASPN,SDC3,SPOCK2,EPHA2,RPL38,HMGA2,CRB2,ATP1A2,EFNB2,CLDN6,CDH8,CHMP4C,SLC16A1,SLC16A3,MAP2K3,BMP2,CNTN1,SCN4B,TUBA4A
16_Member	GO Molecular Functions	GO:0005178	integrin binding	-6.88774	-4.13135	12/156	88,977,1281,3679,3688,3690,4240,6376,6387,7060,10457,10518	ACTN2,CD151,COL3A1,ITGA7,ITGB1,ITGB3,MFGE8,CX3CL1,CXCL12,THBS4,GPNMB,CIB2
16_Member	KEGG Pathway	hsa05410	Hypertrophic cardiomyopathy	-6.26781	-3.6431	9/90	1674,3679,3688,3690,4633,6445,7134,7137,7169	DES,ITGA7,ITGB1,ITGB3,MYL2,SGCG,TNNC1,TNNI3,TPM2
16_Member	KEGG Pathway	hsa05414	Dilated cardiomyopathy	-6.02833	-3.47152	9/96	1674,3679,3688,3690,4633,6445,7134,7137,7169	DES,ITGA7,ITGB1,ITGB3,MYL2,SGCG,TNNC1,TNNI3,TPM2
16_Member	CORUM	CORUM:2395	ITGA7-ITGB1-CD151 complex	-5.91689	-3.38235	3/3	977,3679,3688	CD151,ITGA7,ITGB1
16_Member	CORUM	CORUM:2397	ITGA7-ITGB1-ITGB1BP3 complex	-5.91689	-3.38235	3/3	3679,3688,27231	ITGA7,ITGB1,NMRK2
16_Member	KEGG Pathway	hsa05205	Proteoglycans in cancer	-4.84336	-2.58471	11/205	859,967,3688,3690,5328,5500,6237,7422,22800,51196,54776	CAV3,CD63,ITGB1,ITGB3,PLAU,PPP1CB,RRAS,VEGFA,RRAS2,PLCE1,PPP1R12C
16_Member	KEGG Pathway	hsa04810	Regulation of actin cytoskeleton	-4.59566	-2.40601	11/218	3679,3688,3690,4633,5500,6237,6387,7114,22800,54776,81624	ITGA7,ITGB1,ITGB3,MYL2,PPP1CB,RRAS,CXCL12,TMSB4X,RRAS2,PPP1R12C,DIAPH3
16_Member	GO Biological Processes	GO:0034113	heterotypic cell-cell adhesion	-4.41007	-2.258	5/36	961,3679,3688,3690,4345	CD47,ITGA7,ITGB1,ITGB3,CD200
16_Member	KEGG Pathway	hsa04512	ECM-receptor interaction	-4.3441	-2.20751	7/88	961,1297,3679,3688,3690,7060,22987	CD47,COL9A1,ITGA7,ITGB1,ITGB3,THBS4,SV2C
16_Member	KEGG Pathway	hsa04510	Focal adhesion	-4.17767	-2.10886	10/201	859,1297,3679,3688,3690,4633,5500,7060,7422,54776	CAV3,COL9A1,ITGA7,ITGB1,ITGB3,MYL2,PPP1CB,THBS4,VEGFA,PPP1R12C
16_Member	Canonical Pathways	M18	PID INTEGRIN1 PATHWAY	-4.12178	-2.0589	6/66	1281,1464,3679,3688,5328,7422	COL3A1,CSPG4,ITGA7,ITGB1,PLAU,VEGFA
16_Member	Reactome Gene Sets	R-HSA-3000178	ECM proteoglycans	-3.77927	-1.79451	6/76	1281,1297,3679,3688,3690,54829	COL3A1,COL9A1,ITGA7,ITGB1,ITGB3,ASPN
16_Member	WikiPathways	WP2118	Arrhythmogenic right ventricular cardiomyopathy	-3.77927	-1.79451	6/76	88,1674,3679,3688,3690,6445	ACTN2,DES,ITGA7,ITGB1,ITGB3,SGCG
16_Member	KEGG Pathway	hsa05412	Arrhythmogenic right ventricular cardiomyopathy	-3.74791	-1.76968	6/77	88,1674,3679,3688,3690,6445	ACTN2,DES,ITGA7,ITGB1,ITGB3,SGCG
16_Member	Reactome Gene Sets	R-HSA-3000170	Syndecan interactions	-3.73202	-1.76074	4/27	1281,3688,3690,9672	COL3A1,ITGB1,ITGB3,SDC3
16_Member	GO Molecular Functions	GO:0050840	extracellular matrix binding	-3.517	-1.59789	5/55	3679,3688,3690,7422,9806	ITGA7,ITGB1,ITGB3,VEGFA,SPOCK2
16_Member	Reactome Gene Sets	R-HSA-216083	Integrin cell surface interactions	-3.51299	-1.59519	6/85	961,1281,1297,3679,3688,3690	CD47,COL3A1,COL9A1,ITGA7,ITGB1,ITGB3
16_Member	WikiPathways	WP306	Focal adhesion	-3.45933	-1.55086	9/202	859,3679,3688,3690,4633,5500,7060,7422,54776	CAV3,ITGA7,ITGB1,ITGB3,MYL2,PPP1CB,THBS4,VEGFA,PPP1R12C
16_Member	GO Biological Processes	GO:0007498	mesoderm development	-3.43334	-1.53605	7/123	1969,3688,3690,6169,7422,8091,286204	EPHA2,ITGB1,ITGB3,RPL38,VEGFA,HMGA2,CRB2
16_Member	GO Biological Processes	GO:0051580	regulation of neurotransmitter uptake	-3.13272	-1.31834	3/17	477,3688,3690	ATP1A2,ITGB1,ITGB3
16_Member	GO Biological Processes	GO:0001707	mesoderm formation	-3.08947	-1.28834	5/68	1969,3688,3690,8091,286204	EPHA2,ITGB1,ITGB3,HMGA2,CRB2
16_Member	GO Biological Processes	GO:0048332	mesoderm morphogenesis	-3.03216	-1.24967	5/70	1969,3688,3690,8091,286204	EPHA2,ITGB1,ITGB3,HMGA2,CRB2
16_Member	GO Molecular Functions	GO:0001618	virus receptor activity	-2.87105	-1.13612	5/76	1948,1969,3688,3690,9074	EFNB2,EPHA2,ITGB1,ITGB3,CLDN6
16_Member	GO Molecular Functions	GO:0140272	exogenous protein binding	-2.84566	-1.12068	5/77	1948,1969,3688,3690,9074	EFNB2,EPHA2,ITGB1,ITGB3,CLDN6
16_Member	WikiPathways	WP4541	Hippo-Merlin signaling dysregulation	-2.67202	-0.984132	6/123	1006,1969,3679,3688,3690,5500	CDH8,EPHA2,ITGA7,ITGB1,ITGB3,PPP1CB
16_Member	GO Biological Processes	GO:0048333	mesodermal cell differentiation	-2.58114	-0.92239	3/26	3688,3690,8091	ITGB1,ITGB3,HMGA2
16_Member	Canonical Pathways	M47	PID INTEGRIN CS PATHWAY	-2.58114	-0.92239	3/26	3679,3688,3690	ITGA7,ITGB1,ITGB3
16_Member	GO Biological Processes	GO:0007160	cell-matrix adhesion	-2.51883	-0.875741	6/132	88,967,1281,3679,3688,3690	ACTN2,CD63,COL3A1,ITGA7,ITGB1,ITGB3
16_Member	GO Biological Processes	GO:0052126	movement in host environment	-2.50261	-0.865704	6/133	1948,1969,3688,3690,9074,92421	EFNB2,EPHA2,ITGB1,ITGB3,CLDN6,CHMP4C
16_Member	GO Biological Processes	GO:0007229	integrin-mediated signaling pathway	-2.48567	-0.858277	5/93	961,1281,3679,3688,3690	CD47,COL3A1,ITGA7,ITGB1,ITGB3
16_Member	Reactome Gene Sets	R-HSA-202733	Cell surface interactions at the vascular wall	-2.43925	-0.820514	6/137	961,3688,3690,6566,9123,9672	CD47,ITGB1,ITGB3,SLC16A1,SLC16A3,SDC3
16_Member	Reactome Gene Sets	R-HSA-3000171	Non-integrin membrane-ECM interactions	-2.43452	-0.817096	4/59	1281,3688,3690,9672	COL3A1,ITGB1,ITGB3,SDC3
16_Member	GO Biological Processes	GO:0051701	biological process involved in interaction with host	-2.29061	-0.6987	6/147	1948,1969,3688,3690,9074,92421	EFNB2,EPHA2,ITGB1,ITGB3,CLDN6,CHMP4C
16_Member	GO Biological Processes	GO:0046718	viral entry into host cell	-2.27894	-0.694408	5/104	1948,1969,3688,3690,9074	EFNB2,EPHA2,ITGB1,ITGB3,CLDN6
16_Member	WikiPathways	WP185	Integrin-mediated cell adhesion	-2.27894	-0.694408	5/104	859,3679,3688,3690,5606	CAV3,ITGA7,ITGB1,ITGB3,MAP2K3
16_Member	GO Biological Processes	GO:0044409	entry into host	-2.24423	-0.669931	5/106	1948,1969,3688,3690,9074	EFNB2,EPHA2,ITGB1,ITGB3,CLDN6
16_Member	Reactome Gene Sets	R-HSA-2129379	Molecules associated with elastic fibres	-2.11093	-0.575305	3/38	650,3688,3690	BMP2,ITGB1,ITGB3
16_Member	GO Biological Processes	GO:0033627	cell adhesion mediated by integrin	-2.07956	-0.551497	3/39	3679,3688,3690	ITGA7,ITGB1,ITGB3
16_Member	Reactome Gene Sets	R-HSA-373760	L1CAM interactions	-2.03683	-0.517238	5/119	1272,3688,3690,6330,7277	CNTN1,ITGB1,ITGB3,SCN4B,TUBA4A
17_Summary	GO Biological Processes	GO:0001666	response to hypoxia	-6.50524	-3.82349	15/274	650,664,859,3099,3777,5230,5328,5740,6095,6387,6422,6781,7422,26355,114990	BMP2,BNIP3,CAV3,HK2,KCNK3,PGK1,PLAU,PTGIS,RORA,CXCL12,SFRP1,STC1,VEGFA,FAM162A,VASN
17_Member	GO Biological Processes	GO:0001666	response to hypoxia	-6.50524	-3.82349	15/274	650,664,859,3099,3777,5230,5328,5740,6095,6387,6422,6781,7422,26355,114990	BMP2,BNIP3,CAV3,HK2,KCNK3,PGK1,PLAU,PTGIS,RORA,CXCL12,SFRP1,STC1,VEGFA,FAM162A,VASN
17_Member	GO Biological Processes	GO:0036293	response to decreased oxygen levels	-6.24952	-3.63144	15/287	650,664,859,3099,3777,5230,5328,5740,6095,6387,6422,6781,7422,26355,114990	BMP2,BNIP3,CAV3,HK2,KCNK3,PGK1,PLAU,PTGIS,RORA,CXCL12,SFRP1,STC1,VEGFA,FAM162A,VASN
17_Member	GO Biological Processes	GO:0071456	cellular response to hypoxia	-5.86699	-3.35878	10/129	664,3777,5230,5740,6095,6422,6781,7422,26355,114990	BNIP3,KCNK3,PGK1,PTGIS,RORA,SFRP1,STC1,VEGFA,FAM162A,VASN
17_Member	GO Biological Processes	GO:0070482	response to oxygen levels	-5.84812	-3.3574	15/309	650,664,859,3099,3777,5230,5328,5740,6095,6387,6422,6781,7422,26355,114990	BMP2,BNIP3,CAV3,HK2,KCNK3,PGK1,PLAU,PTGIS,RORA,CXCL12,SFRP1,STC1,VEGFA,FAM162A,VASN
17_Member	GO Biological Processes	GO:0036294	cellular response to decreased oxygen levels	-5.62905	-3.20002	10/137	664,3777,5230,5740,6095,6422,6781,7422,26355,114990	BNIP3,KCNK3,PGK1,PTGIS,RORA,SFRP1,STC1,VEGFA,FAM162A,VASN
17_Member	GO Biological Processes	GO:0071453	cellular response to oxygen levels	-5.22428	-2.88357	10/152	664,3777,5230,5740,6095,6422,6781,7422,26355,114990	BNIP3,KCNK3,PGK1,PTGIS,RORA,SFRP1,STC1,VEGFA,FAM162A,VASN
18_Summary	WikiPathways	WP3888	VEGFA-VEGFR2 signaling pathway	-6.48467	-3.81047	19/439	650,1969,3688,3690,3939,4633,5230,5328,5606,7114,7422,8821,8974,23597,24147,51278,79094,253260,100506658	BMP2,EPHA2,ITGB1,ITGB3,LDHA,MYL2,PGK1,PLAU,MAP2K3,TMSB4X,VEGFA,INPP4B,P4HA2,ACOT9,FJX1,IER5,CHAC1,RICTOR,OCLN
18_Member	WikiPathways	WP3888	VEGFA-VEGFR2 signaling pathway	-6.48467	-3.81047	19/439	650,1969,3688,3690,3939,4633,5230,5328,5606,7114,7422,8821,8974,23597,24147,51278,79094,253260,100506658	BMP2,EPHA2,ITGB1,ITGB3,LDHA,MYL2,PGK1,PLAU,MAP2K3,TMSB4X,VEGFA,INPP4B,P4HA2,ACOT9,FJX1,IER5,CHAC1,RICTOR,OCLN
19_Summary	GO Molecular Functions	GO:0042803	protein homodimerization activity	-6.40438	-3.74491	24/680	196,224,664,1647,2023,4281,5648,6281,6282,7134,7164,7167,7169,7422,8553,8572,10518,23255,55714,79365,79953,83881,92421,114088,477,3688,51504	AHR,ALDH3A2,BNIP3,GADD45A,ENO1,MID1,MASP1,S100A10,S100A11,TNNC1,TPD52L1,TPI1,TPM2,VEGFA,BHLHE40,PDLIM4,CIB2,MTCL1,TENM3,BHLHE41,SYNDIG1,MIXL1,CHMP4C,TRIM9,ATP1A2,ITGB1,TRMT112
19_Member	GO Molecular Functions	GO:0042803	protein homodimerization activity	-6.40438	-3.74491	24/680	196,224,664,1647,2023,4281,5648,6281,6282,7134,7164,7167,7169,7422,8553,8572,10518,23255,55714,79365,79953,83881,92421,114088	AHR,ALDH3A2,BNIP3,GADD45A,ENO1,MID1,MASP1,S100A10,S100A11,TNNC1,TPD52L1,TPI1,TPM2,VEGFA,BHLHE40,PDLIM4,CIB2,MTCL1,TENM3,BHLHE41,SYNDIG1,MIXL1,CHMP4C,TRIM9
19_Member	GO Molecular Functions	GO:0046982	protein heterodimerization activity	-2.0129	-0.500075	9/331	196,477,1647,3688,7169,8553,51504,55714,79365	AHR,ATP1A2,GADD45A,ITGB1,TPM2,BHLHE40,TRMT112,TENM3,BHLHE41
20_Summary	GO Biological Processes	GO:1901379	regulation of potassium ion transmembrane transport	-6.06702	-3.49863	9/95	88,859,967,2273,3688,3753,4878,5999,102723475,6281,6330,8557,24145,140730,477,844,3099,3749,3761,3764,6376,7114,8682,51582,100506658,1272,3690,4129,6387,6781,3777,7137,1329,2743,6533,7388,9016,23439,55002,55244,83862,89872,121601,664,644150	ACTN2,CAV3,CD63,FHL1,ITGB1,KCNE1,NPPA,RGS4,LOC102723475,S100A10,SCN4B,TCAP,PANX1,RIMS4,ATP1A2,CASQ1,HK2,KCNC4,KCNJ4,KCNJ8,CX3CL1,TMSB4X,PEA15,AZIN1,OCLN,CNTN1,ITGB3,MAOB,CXCL12,STC1,KCNK3,TNNI3,COX5B,GLRB,SLC6A6,UQCRH,SLC25A14,ATP1B4,TMCO3,SLC47A1,TMEM120A,AQP10,ANO4,BNIP3,WIPF3
20_Member	GO Biological Processes	GO:1901379	regulation of potassium ion transmembrane transport	-6.06702	-3.49863	9/95	88,859,967,2273,3688,3753,4878,5999,102723475	ACTN2,CAV3,CD63,FHL1,ITGB1,KCNE1,NPPA,RGS4,LOC102723475
20_Member	GO Molecular Functions	GO:0044325	transmembrane transporter binding	-5.92919	-3.38366	10/127	88,859,2273,3753,6281,6330,8557,24145,140730,102723475	ACTN2,CAV3,FHL1,KCNE1,S100A10,SCN4B,TCAP,PANX1,RIMS4,LOC102723475
20_Member	GO Biological Processes	GO:0034762	regulation of transmembrane transport	-5.84564	-3.3574	21/580	88,477,844,859,967,2273,3099,3688,3749,3753,3761,3764,4878,5999,6330,6376,7114,8682,51582,100506658,102723475	ACTN2,ATP1A2,CASQ1,CAV3,CD63,FHL1,HK2,ITGB1,KCNC4,KCNE1,KCNJ4,KCNJ8,NPPA,RGS4,SCN4B,CX3CL1,TMSB4X,PEA15,AZIN1,OCLN,LOC102723475
20_Member	GO Biological Processes	GO:0043266	regulation of potassium ion transport	-5.53106	-3.11874	9/110	88,859,967,2273,3688,3753,4878,5999,102723475	ACTN2,CAV3,CD63,FHL1,ITGB1,KCNE1,NPPA,RGS4,LOC102723475
20_Member	GO Biological Processes	GO:0043269	regulation of ion transport	-5.25706	-2.90579	22/685	88,477,844,859,967,1272,2273,3688,3690,3749,3753,3761,3764,4129,4878,5999,6330,6376,6387,6781,7114,102723475	ACTN2,ATP1A2,CASQ1,CAV3,CD63,CNTN1,FHL1,ITGB1,ITGB3,KCNC4,KCNE1,KCNJ4,KCNJ8,MAOB,NPPA,RGS4,SCN4B,CX3CL1,CXCL12,STC1,TMSB4X,LOC102723475
20_Member	GO Biological Processes	GO:1901016	regulation of potassium ion transmembrane transporter activity	-5.12429	-2.80394	7/67	88,859,2273,3688,3753,4878,102723475	ACTN2,CAV3,FHL1,ITGB1,KCNE1,NPPA,LOC102723475
20_Member	GO Biological Processes	GO:0010959	regulation of metal ion transport	-5.07808	-2.76756	16/403	88,477,844,859,967,1272,2273,3688,3753,4878,5999,6330,6376,6387,6781,102723475	ACTN2,ATP1A2,CASQ1,CAV3,CD63,CNTN1,FHL1,ITGB1,KCNE1,NPPA,RGS4,SCN4B,CX3CL1,CXCL12,STC1,LOC102723475
20_Member	GO Biological Processes	GO:0086001	cardiac muscle cell action potential	-4.86838	-2.60685	6/49	477,859,3753,3764,6330,102723475	ATP1A2,CAV3,KCNE1,KCNJ8,SCN4B,LOC102723475
20_Member	GO Biological Processes	GO:0099623	regulation of cardiac muscle cell membrane repolarization	-4.80975	-2.55965	5/30	859,3753,4878,6330,102723475	CAV3,KCNE1,NPPA,SCN4B,LOC102723475
20_Member	GO Biological Processes	GO:0034765	regulation of ion transmembrane transport	-4.68264	-2.45986	17/483	88,477,844,859,967,2273,3688,3749,3753,3761,3764,4878,5999,6330,6376,7114,102723475	ACTN2,ATP1A2,CASQ1,CAV3,CD63,FHL1,ITGB1,KCNC4,KCNE1,KCNJ4,KCNJ8,NPPA,RGS4,SCN4B,CX3CL1,TMSB4X,LOC102723475
20_Member	GO Biological Processes	GO:1901380	negative regulation of potassium ion transmembrane transport	-4.66719	-2.45739	5/32	88,859,3753,5999,102723475	ACTN2,CAV3,KCNE1,RGS4,LOC102723475
20_Member	GO Biological Processes	GO:1904062	regulation of cation transmembrane transport	-4.50964	-2.33447	14/353	88,477,844,859,967,2273,3688,3753,4878,5999,6330,6376,7114,102723475	ACTN2,ATP1A2,CASQ1,CAV3,CD63,FHL1,ITGB1,KCNE1,NPPA,RGS4,SCN4B,CX3CL1,TMSB4X,LOC102723475
20_Member	GO Biological Processes	GO:0043270	positive regulation of ion transport	-4.37123	-2.22808	12/273	88,844,1272,2273,3688,3753,4878,6330,6376,6387,6781,7114	ACTN2,CASQ1,CNTN1,FHL1,ITGB1,KCNE1,NPPA,SCN4B,CX3CL1,CXCL12,STC1,TMSB4X
20_Member	GO Biological Processes	GO:0086002	cardiac muscle cell action potential involved in contraction	-4.29335	-2.16748	5/38	859,3753,3764,6330,102723475	CAV3,KCNE1,KCNJ8,SCN4B,LOC102723475
20_Member	GO Biological Processes	GO:0043267	negative regulation of potassium ion transport	-4.23756	-2.13727	5/39	88,859,3753,5999,102723475	ACTN2,CAV3,KCNE1,RGS4,LOC102723475
20_Member	GO Biological Processes	GO:0060306	regulation of membrane repolarization	-4.23756	-2.13727	5/39	859,3753,4878,6330,102723475	CAV3,KCNE1,NPPA,SCN4B,LOC102723475
20_Member	GO Biological Processes	GO:0086005	ventricular cardiac muscle cell action potential	-4.17727	-2.10886	4/21	859,3753,3764,102723475	CAV3,KCNE1,KCNJ8,LOC102723475
20_Member	Reactome Gene Sets	R-HSA-5576891	Cardiac conduction	-4.10882	-2.04777	8/129	477,844,3753,3761,3777,4878,6330,7137	ATP1A2,CASQ1,KCNE1,KCNJ4,KCNK3,NPPA,SCN4B,TNNI3
20_Member	GO Biological Processes	GO:0086003	cardiac muscle cell contraction	-4.02953	-1.98985	5/43	859,3753,3764,6330,102723475	CAV3,KCNE1,KCNJ8,SCN4B,LOC102723475
20_Member	GO Biological Processes	GO:0060307	regulation of ventricular cardiac muscle cell membrane repolarization	-3.86689	-1.86384	4/25	859,3753,6330,102723475	CAV3,KCNE1,SCN4B,LOC102723475
20_Member	GO Biological Processes	GO:0086009	membrane repolarization	-3.86689	-1.86384	4/25	477,3753,3764,102723475	ATP1A2,KCNE1,KCNJ8,LOC102723475
20_Member	GO Biological Processes	GO:0032412	regulation of ion transmembrane transporter activity	-3.86374	-1.86228	11/263	88,477,844,859,2273,3688,3753,4878,6330,7114,102723475	ACTN2,ATP1A2,CASQ1,CAV3,FHL1,ITGB1,KCNE1,NPPA,SCN4B,TMSB4X,LOC102723475
20_Member	GO Molecular Functions	GO:0015318	inorganic molecular entity transmembrane transporter activity	-3.86067	-1.86079	20/732	477,1329,2743,3749,3753,3761,3764,3777,6330,6533,7388,9016,23439,24145,55002,55244,83862,89872,121601,102723475	ATP1A2,COX5B,GLRB,KCNC4,KCNE1,KCNJ4,KCNJ8,KCNK3,SCN4B,SLC6A6,UQCRH,SLC25A14,ATP1B4,PANX1,TMCO3,SLC47A1,TMEM120A,AQP10,ANO4,LOC102723475
20_Member	GO Biological Processes	GO:0022898	regulation of transmembrane transporter activity	-3.72284	-1.75798	11/273	88,477,844,859,2273,3688,3753,4878,6330,7114,102723475	ACTN2,ATP1A2,CASQ1,CAV3,FHL1,ITGB1,KCNE1,NPPA,SCN4B,TMSB4X,LOC102723475
20_Member	GO Biological Processes	GO:1901017	negative regulation of potassium ion transmembrane transporter activity	-3.66873	-1.71541	4/28	88,859,3753,102723475	ACTN2,CAV3,KCNE1,LOC102723475
20_Member	GO Biological Processes	GO:0042391	regulation of membrane potential	-3.65902	-1.70711	14/425	88,477,664,859,2273,2743,3753,3764,3777,4878,5999,6330,140730,102723475	ACTN2,ATP1A2,BNIP3,CAV3,FHL1,GLRB,KCNE1,KCNJ8,KCNK3,NPPA,RGS4,SCN4B,RIMS4,LOC102723475
20_Member	GO Biological Processes	GO:0098915	membrane repolarization during ventricular cardiac muscle cell action potential	-3.60558	-1.67175	3/12	3753,3764,102723475	KCNE1,KCNJ8,LOC102723475
20_Member	GO Biological Processes	GO:0099625	ventricular cardiac muscle cell membrane repolarization	-3.60558	-1.67175	3/12	3753,3764,102723475	KCNE1,KCNJ8,LOC102723475
20_Member	GO Molecular Functions	GO:1902282	voltage-gated potassium channel activity involved in ventricular cardiac muscle cell action potential repolarization	-3.60558	-1.67175	3/12	3753,3764,102723475	KCNE1,KCNJ8,LOC102723475
20_Member	GO Biological Processes	GO:0043271	negative regulation of ion transport	-3.55823	-1.63249	8/155	88,477,859,3753,4129,5999,6781,102723475	ACTN2,ATP1A2,CAV3,KCNE1,MAOB,RGS4,STC1,LOC102723475
20_Member	GO Molecular Functions	GO:0005249	voltage-gated potassium channel activity	-3.35319	-1.47066	6/91	3749,3753,3761,3764,3777,102723475	KCNC4,KCNE1,KCNJ4,KCNJ8,KCNK3,LOC102723475
20_Member	GO Biological Processes	GO:0006813	potassium ion transport	-3.3239	-1.44857	8/168	477,3749,3753,3761,3764,3777,23439,102723475	ATP1A2,KCNC4,KCNE1,KCNJ4,KCNJ8,KCNK3,ATP1B4,LOC102723475
20_Member	GO Biological Processes	GO:0032409	regulation of transporter activity	-3.31427	-1.44131	11/305	88,477,844,859,2273,3688,3753,4878,6330,7114,102723475	ACTN2,ATP1A2,CASQ1,CAV3,FHL1,ITGB1,KCNE1,NPPA,SCN4B,TMSB4X,LOC102723475
20_Member	GO Molecular Functions	GO:0086008	voltage-gated potassium channel activity involved in cardiac muscle cell action potential repolarization	-3.30033	-1.43325	3/15	3753,3764,102723475	KCNE1,KCNJ8,LOC102723475
20_Member	GO Biological Processes	GO:0034764	positive regulation of transmembrane transport	-3.29215	-1.42623	9/213	88,844,3688,3753,4878,6376,7114,51582,100506658	ACTN2,CASQ1,ITGB1,KCNE1,NPPA,CX3CL1,TMSB4X,AZIN1,OCLN
20_Member	GO Biological Processes	GO:0098660	inorganic ion transmembrane transport	-3.24908	-1.39352	17/637	477,1329,2743,3749,3753,3761,3764,3777,6330,6533,7388,9016,24145,55002,55244,121601,102723475	ATP1A2,COX5B,GLRB,KCNC4,KCNE1,KCNJ4,KCNJ8,KCNK3,SCN4B,SLC6A6,UQCRH,SLC25A14,PANX1,TMCO3,SLC47A1,ANO4,LOC102723475
20_Member	GO Biological Processes	GO:0001508	action potential	-3.20538	-1.36545	6/97	477,859,3753,3764,6330,102723475	ATP1A2,CAV3,KCNE1,KCNJ8,SCN4B,LOC102723475
20_Member	GO Biological Processes	GO:0030048	actin filament-based movement	-3.20538	-1.36545	6/97	859,3753,3764,6330,644150,102723475	CAV3,KCNE1,KCNJ8,SCN4B,WIPF3,LOC102723475
20_Member	GO Biological Processes	GO:1904063	negative regulation of cation transmembrane transport	-3.1818	-1.35056	6/98	88,477,859,3753,5999,102723475	ACTN2,ATP1A2,CAV3,KCNE1,RGS4,LOC102723475
20_Member	GO Biological Processes	GO:0070252	actin-mediated cell contraction	-3.11887	-1.30861	5/67	859,3753,3764,6330,102723475	CAV3,KCNE1,KCNJ8,SCN4B,LOC102723475
20_Member	GO Biological Processes	GO:0034763	negative regulation of transmembrane transport	-3.07904	-1.28355	7/141	88,477,859,3753,5999,8682,102723475	ACTN2,ATP1A2,CAV3,KCNE1,RGS4,PEA15,LOC102723475
20_Member	GO Biological Processes	GO:0034766	negative regulation of ion transmembrane transport	-3.04613	-1.25978	6/104	88,477,859,3753,5999,102723475	ACTN2,ATP1A2,CAV3,KCNE1,RGS4,LOC102723475
20_Member	GO Biological Processes	GO:0002027	regulation of heart rate	-3.02443	-1.24577	6/105	859,3753,4878,5999,6330,102723475	CAV3,KCNE1,NPPA,RGS4,SCN4B,LOC102723475
20_Member	GO Biological Processes	GO:0086013	membrane repolarization during cardiac muscle cell action potential	-2.98578	-1.21654	3/19	3753,3764,102723475	KCNE1,KCNJ8,LOC102723475
20_Member	GO Biological Processes	GO:0099622	cardiac muscle cell membrane repolarization	-2.98578	-1.21654	3/19	3753,3764,102723475	KCNE1,KCNJ8,LOC102723475
20_Member	GO Molecular Functions	GO:0015079	potassium ion transmembrane transporter activity	-2.85623	-1.12761	7/154	477,3749,3753,3761,3764,3777,102723475	ATP1A2,KCNC4,KCNE1,KCNJ4,KCNJ8,KCNK3,LOC102723475
20_Member	GO Biological Processes	GO:0086011	membrane repolarization during action potential	-2.85512	-1.12761	3/21	3753,3764,102723475	KCNE1,KCNJ8,LOC102723475
20_Member	GO Biological Processes	GO:1902259	regulation of delayed rectifier potassium channel activity	-2.85512	-1.12761	3/21	3753,4878,102723475	KCNE1,NPPA,LOC102723475
20_Member	GO Biological Processes	GO:0071805	potassium ion transmembrane transport	-2.79238	-1.07727	7/158	477,3749,3753,3761,3764,3777,102723475	ATP1A2,KCNC4,KCNE1,KCNJ4,KCNJ8,KCNK3,LOC102723475
20_Member	GO Biological Processes	GO:0034767	positive regulation of ion transmembrane transport	-2.71539	-1.01257	7/163	88,844,3688,3753,4878,6376,7114	ACTN2,CASQ1,ITGB1,KCNE1,NPPA,CX3CL1,TMSB4X
20_Member	GO Molecular Functions	GO:0005267	potassium channel activity	-2.70796	-1.00593	6/121	3749,3753,3761,3764,3777,102723475	KCNC4,KCNE1,KCNJ4,KCNJ8,KCNK3,LOC102723475
20_Member	GO Biological Processes	GO:0032413	negative regulation of ion transmembrane transporter activity	-2.70103	-1.00218	5/83	88,477,859,3753,102723475	ACTN2,ATP1A2,CAV3,KCNE1,LOC102723475
20_Member	GO Molecular Functions	GO:0022890	inorganic cation transmembrane transporter activity	-2.68362	-0.992062	15/596	477,1329,3749,3753,3761,3764,3777,6330,6533,7388,23439,24145,55002,55244,102723475	ATP1A2,COX5B,KCNC4,KCNE1,KCNJ4,KCNJ8,KCNK3,SCN4B,SLC6A6,UQCRH,ATP1B4,PANX1,TMCO3,SLC47A1,LOC102723475
20_Member	GO Biological Processes	GO:0043268	positive regulation of potassium ion transport	-2.66592	-0.981949	4/51	88,2273,3753,4878	ACTN2,FHL1,KCNE1,NPPA
20_Member	GO Biological Processes	GO:0140115	export across plasma membrane	-2.51679	-0.875741	4/56	477,3753,55244,102723475	ATP1A2,KCNE1,SLC47A1,LOC102723475
20_Member	GO Biological Processes	GO:2001257	regulation of cation channel activity	-2.47471	-0.848661	7/180	88,844,3688,3753,4878,7114,102723475	ACTN2,CASQ1,ITGB1,KCNE1,NPPA,TMSB4X,LOC102723475
20_Member	GO Biological Processes	GO:0098662	inorganic cation transmembrane transport	-2.43948	-0.820514	14/571	477,1329,3749,3753,3761,3764,3777,6330,6533,7388,24145,55002,55244,102723475	ATP1A2,COX5B,KCNC4,KCNE1,KCNJ4,KCNJ8,KCNK3,SCN4B,SLC6A6,UQCRH,PANX1,TMCO3,SLC47A1,LOC102723475
20_Member	GO Molecular Functions	GO:0008324	cation transmembrane transporter activity	-2.3341	-0.733147	15/650	477,1329,3749,3753,3761,3764,3777,6330,6533,7388,23439,24145,55002,55244,102723475	ATP1A2,COX5B,KCNC4,KCNE1,KCNJ4,KCNJ8,KCNK3,SCN4B,SLC6A6,UQCRH,ATP1B4,PANX1,TMCO3,SLC47A1,LOC102723475
20_Member	GO Molecular Functions	GO:0022843	voltage-gated cation channel activity	-2.33381	-0.733147	6/144	3749,3753,3761,3764,3777,102723475	KCNC4,KCNE1,KCNJ4,KCNJ8,KCNK3,LOC102723475
20_Member	GO Molecular Functions	GO:0005251	delayed rectifier potassium channel activity	-2.28316	-0.696793	3/33	3749,3753,102723475	KCNC4,KCNE1,LOC102723475
20_Member	GO Biological Processes	GO:1904064	positive regulation of cation transmembrane transport	-2.27645	-0.692528	6/148	88,844,3753,4878,6376,7114	ACTN2,CASQ1,KCNE1,NPPA,CX3CL1,TMSB4X
20_Member	GO Biological Processes	GO:0061337	cardiac conduction	-2.26015	-0.679258	4/66	477,3753,6330,102723475	ATP1A2,KCNE1,SCN4B,LOC102723475
20_Member	GO Biological Processes	GO:0032410	negative regulation of transporter activity	-2.24423	-0.669931	5/106	88,477,859,3753,102723475	ACTN2,ATP1A2,CAV3,KCNE1,LOC102723475
20_Member	GO Molecular Functions	GO:0015267	channel activity	-2.22892	-0.657589	12/480	2743,3749,3753,3761,3764,3777,6330,24145,83862,89872,121601,102723475	GLRB,KCNC4,KCNE1,KCNJ4,KCNJ8,KCNK3,SCN4B,PANX1,TMEM120A,AQP10,ANO4,LOC102723475
20_Member	GO Molecular Functions	GO:0022803	passive transmembrane transporter activity	-2.222	-0.651259	12/481	2743,3749,3753,3761,3764,3777,6330,24145,83862,89872,121601,102723475	GLRB,KCNC4,KCNE1,KCNJ4,KCNJ8,KCNK3,SCN4B,PANX1,TMEM120A,AQP10,ANO4,LOC102723475
20_Member	GO Molecular Functions	GO:0005244	voltage-gated ion channel activity	-2.2155	-0.648247	7/201	3749,3753,3761,3764,3777,6330,102723475	KCNC4,KCNE1,KCNJ4,KCNJ8,KCNK3,SCN4B,LOC102723475
20_Member	GO Molecular Functions	GO:0022832	voltage-gated channel activity	-2.2155	-0.648247	7/201	3749,3753,3761,3764,3777,6330,102723475	KCNC4,KCNE1,KCNJ4,KCNJ8,KCNK3,SCN4B,LOC102723475
20_Member	GO Biological Processes	GO:2001259	positive regulation of cation channel activity	-2.14843	-0.601924	4/71	88,844,4878,7114	ACTN2,CASQ1,NPPA,TMSB4X
20_Member	GO Molecular Functions	GO:0005216	ion channel activity	-2.14188	-0.599187	11/432	2743,3749,3753,3761,3764,3777,6330,24145,83862,121601,102723475	GLRB,KCNC4,KCNE1,KCNJ4,KCNJ8,KCNK3,SCN4B,PANX1,TMEM120A,ANO4,LOC102723475
20_Member	GO Biological Processes	GO:0086091	regulation of heart rate by cardiac conduction	-2.07956	-0.551497	3/39	3753,6330,102723475	KCNE1,SCN4B,LOC102723475
20_Member	GO Biological Processes	GO:0098655	cation transmembrane transport	-2.02024	-0.506157	14/640	477,1329,3749,3753,3761,3764,3777,6330,6533,7388,24145,55002,55244,102723475	ATP1A2,COX5B,KCNC4,KCNE1,KCNJ4,KCNJ8,KCNK3,SCN4B,SLC6A6,UQCRH,PANX1,TMCO3,SLC47A1,LOC102723475

## Sheet: Sheet2
GroupID	Category	Term	Description	LogP	Log(q-value)	InTerm_InList	Genes	Symbols
1_Member	Hallmark Gene Sets	M5891	HALLMARK HYPOXIA	-13.2209	-9.08426	20/200	1316,1843,2023,2026,2027,2632,3099,3939,5033,5230,6095,6533,6781,7167,7422,8553,8974,9672,26355,284119	KLF6,DUSP1,ENO1,ENO2,ENO3,GBE1,HK2,LDHA,P4HA1,PGK1,RORA,SLC6A6,STC1,TPI1,VEGFA,BHLHE40,P4HA2,SDC3,FAM162A,CAVIN1
1_Member	Hallmark Gene Sets	M5937	HALLMARK GLYCOLYSIS	-9.23742	-6.16152	16/200	2023,2026,3099,3939,5033,5223,5230,6662,6676,6781,7167,7422,8974,9123,9672,26355	ENO1,ENO2,HK2,LDHA,P4HA1,PGAM1,PGK1,SOX9,SPAG4,STC1,TPI1,VEGFA,P4HA2,SLC16A3,SDC3,FAM162A
2_Summary	Hallmark Gene Sets	M5930	HALLMARK EPITHELIAL MESENCHYMAL TRANSITION	-13.2209	-9.08426	20/200	374,388,1281,1303,1647,1809,2026,3485,3688,3690,5396,5999,6387,6422,6445,7169,7422,8572,10272,56937	AREG,RHOB,COL3A1,COL12A1,GADD45A,DPYSL3,ENO2,IGFBP2,ITGB1,ITGB3,PRRX1,RGS4,CXCL12,SFRP1,SGCG,TPM2,VEGFA,PDLIM4,FSTL3,PMEPA1
3_Member	GO Biological Processes	GO:0048738	cardiac muscle tissue development	-9.18221	-6.1248	15/173	88,650,859,3688,4633,4878,4879,6445,7134,7137,7422,7490,8557,84525,129446	ACTN2,BMP2,CAV3,ITGB1,MYL2,NPPA,NPPB,SGCG,TNNC1,TNNI3,VEGFA,WT1,TCAP,HOPX,XIRP2
3_Member	GO Biological Processes	GO:0045214	sarcomere organization	-4.29335	-2.16748	5/38	88,844,3688,8557,58529	ACTN2,CASQ1,ITGB1,TCAP,MYOZ1
5_Summary	GO Biological Processes	GO:0030029	actin filament-based process	-11.44	-7.70138	30/602	58,88,388,390,844,859,1264,1809,2620,3688,3753,3764,4633,6330,7114,7169,8557,8572,10083,10160,23075,27295,58529,81624,83543,129446,253260,254102,644150,102723475,7134,7137,8727,11346,22846,24145,26064,56062,79789,91977,1281,1303,1674,5033	ACTA1,ACTN2,RHOB,RND3,CASQ1,CAV3,CNN1,DPYSL3,GAS2,ITGB1,KCNE1,KCNJ8,MYL2,SCN4B,TMSB4X,TPM2,TCAP,PDLIM4,USH1C,FARP1,SWAP70,PDLIM3,MYOZ1,DIAPH3,AIF1L,XIRP2,RICTOR,EHBP1L1,WIPF3,LOC102723475,TNNC1,TNNI3,CTNNAL1,SYNPO,VASH1,PANX1,RAI14,KLHL4,CLMN,MYOZ3,COL3A1,COL12A1,DES,P4HA1
8_Summary	Reactome Gene Sets	R-HSA-397014	Muscle contraction	-10.296	-6.93752	17/197	58,88,477,844,859,1674,3753,3761,3777,4633,4878,6330,7134,7137,7169,8291,8557,384,3764,5606,23336,102723475,58529,6445,1573,5999,6781,8862,84525,745,1264,2023,4879,27242,51196,6387,7422,100506658,6533,6566,1329,7388,23439,5500,650,1281,129446,2050,6662,23768,2743,10083	ACTA1,ACTN2,ATP1A2,CASQ1,CAV3,DES,KCNE1,KCNJ4,KCNK3,MYL2,NPPA,SCN4B,TNNC1,TNNI3,TPM2,DYSF,TCAP,ARG2,KCNJ8,MAP2K3,SYNM,LOC102723475,MYOZ1,SGCG,CYP2J2,RGS4,STC1,APLN,HOPX,MYRF,CNN1,ENO1,NPPB,TNFRSF21,PLCE1,CXCL12,VEGFA,OCLN,SLC6A6,SLC16A1,COX5B,UQCRH,ATP1B4,PPP1CB,BMP2,COL3A1,XIRP2,EPHB4,SOX9,FLRT2,GLRB,USH1C
9_Summary	Hallmark Gene Sets	M5890	HALLMARK TNFA SIGNALING VIA NFKB	-10.1921	-6.86846	17/200	374,388,650,1316,1647,1843,5328,5606,5791,5971,7422,8553,22822,24145,24147,51278,56937	AREG,RHOB,BMP2,KLF6,GADD45A,DUSP1,PLAU,MAP2K3,PTPRE,RELB,VEGFA,BHLHE40,PHLDA1,PANX1,FJX1,IER5,PMEPA1
14_Member	GO Biological Processes	GO:0007411	axon guidance	-5.16568	-2.83523	12/227	1272,1948,1969,2043,2050,6387,7422,9423,10678,23768,54437,152330	CNTN1,EFNB2,EPHA2,EPHA4,EPHB4,CXCL12,VEGFA,NTN1,B3GNT2,FLRT2,SEMA5B,CNTN4
16_Summary	GO Molecular Functions	GO:0005178	integrin binding	-6.88774	-4.13135	12/156	88,977,1281,3679,3688,3690,4240,6376,6387,7060,10457,10518,1674,4633,6445,7134,7137,7169,27231,859,967,5328,5500,6237,7422,22800,51196,54776,7114,81624,961,4345,1297,22987,1464,54829,9672,9806,1969,6169,8091,286204,477,1948,9074,1006,92421,6566,9123,5606,650,1272,6330,7277	ACTN2,CD151,COL3A1,ITGA7,ITGB1,ITGB3,MFGE8,CX3CL1,CXCL12,THBS4,GPNMB,CIB2,DES,MYL2,SGCG,TNNC1,TNNI3,TPM2,NMRK2,CAV3,CD63,PLAU,PPP1CB,RRAS,VEGFA,RRAS2,PLCE1,PPP1R12C,TMSB4X,DIAPH3,CD47,CD200,COL9A1,SV2C,CSPG4,ASPN,SDC3,SPOCK2,EPHA2,RPL38,HMGA2,CRB2,ATP1A2,EFNB2,CLDN6,CDH8,CHMP4C,SLC16A1,SLC16A3,MAP2K3,BMP2,CNTN1,SCN4B,TUBA4A
16_Member	KEGG Pathway	hsa05410	Hypertrophic cardiomyopathy	-6.26781	-3.6431	9/90	1674,3679,3688,3690,4633,6445,7134,7137,7169	DES,ITGA7,ITGB1,ITGB3,MYL2,SGCG,TNNC1,TNNI3,TPM2
16_Member	KEGG Pathway	hsa05414	Dilated cardiomyopathy	-6.02833	-3.47152	9/96	1674,3679,3688,3690,4633,6445,7134,7137,7169	DES,ITGA7,ITGB1,ITGB3,MYL2,SGCG,TNNC1,TNNI3,TPM2
20_Member	GO Biological Processes	GO:0086005	ventricular cardiac muscle cell action potential	-4.17727	-2.10886	4/21	859,3753,3764,102723475	CAV3,KCNE1,KCNJ8,LOC102723475

## Sheet: Sheet3
GroupID	Category	Term	Description	LogP	Log(q-value)	InTerm_InList	Genes	Symbols
1_Member	Hallmark Gene Sets	M5937	HALLMARK GLYCOLYSIS	-9.23742	-6.16152	16/200	2023,2026,3099,3939,5033,5223,5230,6662,6676,6781,7167,7422,8974,9123,9672,26355	ENO1,ENO2,HK2,LDHA,P4HA1,PGAM1,PGK1,SOX9,SPAG4,STC1,TPI1,VEGFA,P4HA2,SLC16A3,SDC3,FAM162A
3_Member	GO Biological Processes	GO:0048738	cardiac muscle tissue development	-9.18221	-6.1248	15/173	88,650,859,3688,4633,4878,4879,6445,7134,7137,7422,7490,8557,84525,129446	ACTN2,BMP2,CAV3,ITGB1,MYL2,NPPA,NPPB,SGCG,TNNC1,TNNI3,VEGFA,WT1,TCAP,HOPX,XIRP2
3_Member	GO Biological Processes	GO:0045214	sarcomere organization	-4.29335	-2.16748	5/38	88,844,3688,8557,58529	ACTN2,CASQ1,ITGB1,TCAP,MYOZ1
5_Summary	GO Biological Processes	GO:0030029	actin filament-based process	-11.44	-7.70138	30/602	58,88,388,390,844,859,1264,1809,2620,3688,3753,3764,4633,6330,7114,7169,8557,8572,10083,10160,23075,27295,58529,81624,83543,129446,253260,254102,644150,102723475,7134,7137,8727,11346,22846,24145,26064,56062,79789,91977,1281,1303,1674,5033	ACTA1,ACTN2,RHOB,RND3,CASQ1,CAV3,CNN1,DPYSL3,GAS2,ITGB1,KCNE1,KCNJ8,MYL2,SCN4B,TMSB4X,TPM2,TCAP,PDLIM4,USH1C,FARP1,SWAP70,PDLIM3,MYOZ1,DIAPH3,AIF1L,XIRP2,RICTOR,EHBP1L1,WIPF3,LOC102723475,TNNC1,TNNI3,CTNNAL1,SYNPO,VASH1,PANX1,RAI14,KLHL4,CLMN,MYOZ3,COL3A1,COL12A1,DES,P4HA1
8_Summary	Reactome Gene Sets	R-HSA-397014	Muscle contraction	-10.296	-6.93752	17/197	58,88,477,844,859,1674,3753,3761,3777,4633,4878,6330,7134,7137,7169,8291,8557,384,3764,5606,23336,102723475,58529,6445,1573,5999,6781,8862,84525,745,1264,2023,4879,27242,51196,6387,7422,100506658,6533,6566,1329,7388,23439,5500,650,1281,129446,2050,6662,23768,2743,10083	ACTA1,ACTN2,ATP1A2,CASQ1,CAV3,DES,KCNE1,KCNJ4,KCNK3,MYL2,NPPA,SCN4B,TNNC1,TNNI3,TPM2,DYSF,TCAP,ARG2,KCNJ8,MAP2K3,SYNM,LOC102723475,MYOZ1,SGCG,CYP2J2,RGS4,STC1,APLN,HOPX,MYRF,CNN1,ENO1,NPPB,TNFRSF21,PLCE1,CXCL12,VEGFA,OCLN,SLC6A6,SLC16A1,COX5B,UQCRH,ATP1B4,PPP1CB,BMP2,COL3A1,XIRP2,EPHB4,SOX9,FLRT2,GLRB,USH1C
9_Summary	Hallmark Gene Sets	M5890	HALLMARK TNFA SIGNALING VIA NFKB	-10.1921	-6.86846	17/200	374,388,650,1316,1647,1843,5328,5606,5791,5971,7422,8553,22822,24145,24147,51278,56937	AREG,RHOB,BMP2,KLF6,GADD45A,DUSP1,PLAU,MAP2K3,PTPRE,RELB,VEGFA,BHLHE40,PHLDA1,PANX1,FJX1,IER5,PMEPA1
16_Summary	GO Molecular Functions	GO:0005178	integrin binding	-6.88774	-4.13135	12/156	88,977,1281,3679,3688,3690,4240,6376,6387,7060,10457,10518,1674,4633,6445,7134,7137,7169,27231,859,967,5328,5500,6237,7422,22800,51196,54776,7114,81624,961,4345,1297,22987,1464,54829,9672,9806,1969,6169,8091,286204,477,1948,9074,1006,92421,6566,9123,5606,650,1272,6330,7277	ACTN2,CD151,COL3A1,ITGA7,ITGB1,ITGB3,MFGE8,CX3CL1,CXCL12,THBS4,GPNMB,CIB2,DES,MYL2,SGCG,TNNC1,TNNI3,TPM2,NMRK2,CAV3,CD63,PLAU,PPP1CB,RRAS,VEGFA,RRAS2,PLCE1,PPP1R12C,TMSB4X,DIAPH3,CD47,CD200,COL9A1,SV2C,CSPG4,ASPN,SDC3,SPOCK2,EPHA2,RPL38,HMGA2,CRB2,ATP1A2,EFNB2,CLDN6,CDH8,CHMP4C,SLC16A1,SLC16A3,MAP2K3,BMP2,CNTN1,SCN4B,TUBA4A
16_Member	KEGG Pathway	hsa05410	Hypertrophic cardiomyopathy	-6.26781	-3.6431	9/90	1674,3679,3688,3690,4633,6445,7134,7137,7169	DES,ITGA7,ITGB1,ITGB3,MYL2,SGCG,TNNC1,TNNI3,TPM2
16_Member	KEGG Pathway	hsa05414	Dilated cardiomyopathy	-6.02833	-3.47152	9/96	1674,3679,3688,3690,4633,6445,7134,7137,7169	DES,ITGA7,ITGB1,ITGB3,MYL2,SGCG,TNNC1,TNNI3,TPM2
20_Member	GO Biological Processes	GO:0086005	ventricular cardiac muscle cell action potential	-4.17727	-2.10886	4/21	859,3753,3764,102723475	CAV3,KCNE1,KCNJ8,LOC102723475
