# Supplementary material for: HSBP7 Rescue of a Titin Cardiomyopathy Identified by Morphological Profiling
Source: Research Square preprint supplement (doi:10.21203/rs.3.rs-4558927/v1), 2024-07-08
Supplement: Supplementary file 3 [file d308595221e0000f64cf8700.xlsx]

## Sheet: GeneSelectionFromGWAS_LVESVi_LV
Gene	Distance TSS to index variant [bp]	GWAS Trait	Index variant	Chr Index variant	Position [b38] Index variant	P-value Index variant	eQTL heart left ventricle	median(TPM) heart left ventricle	Fibroblasts % cells expressing	Cardiomyocytes % cells expressing
CLCNKA	4	LVESVi	rs945425	1	16021917	8.5e-23	1	0.196	0	0.1
FBXO42	231510	LVESVi	rs945425	1	16021917	8.5e-23	0	4.863	29.5	24.1
HSPB7	2323	LVESVi	rs945425	1	16021917	8.5e-23	0	1825.31	2.5	28.7
MAST2	245627	LVESVi	rs753562515	1	45541360	1.7e-08	0	32.742	11.5	46.6
PRDX1	1372	LVESVi	rs753562515	1	45541360	1.7e-08	0	134.224	3.7	2.6
TTN	1810	LVESVi	rs2562845	2	178649706	1.6e-22	0	66.761	28.5	99.2
TTN	1810	LVESVi	rs190093681	2	179229625	1.6e-08	0	66.761	28.5	99.2
FNDC3B	2082	LVESVi	rs1499813	3	172042637	2.8e-09	0	7.715	73.9	61.7
PLD1	231687	LVESVi	rs1499813	3	172042637	2.8e-09	0	4.752	33.1	45.3
CPNE5	77869	LVESVi	rs3176326	6	36679512	1.8e-14	0	14.434	1.8	33.1
MTCH1	291404	LVESVi	rs3176326	6	36679512	1.8e-14	0	113.105	6.9	11.4
NDUFB9	291505	LVESVi	rs200712209	8	124846296	3.3e-12	0	188.245	3.5	9.1
NSMCE2	245383	LVESVi	rs200712209	8	124846296	3.3e-12	0	5.687	32.3	40.4
TMEM65	473595	LVESVi	rs200712209	8	124846296	3.3e-12	0	8.511	5.1	39.6
PTK2	37854	LVESVi	rs1962104	8	140625230	6.4e-10	0	6.464	39.3	39.5
TRAPPC9	166651	LVESVi	rs1962104	8	140625230	6.4e-10	0	6.385	16.1	34.1
RBM20	39221	LVESVi	rs189569984	10	110784367	2.1e-09	0	29.918	4.7	88
BAG3	437	LVESVi	rs72840788	10	119656173	1.7e-28	0	87.716	1.7	4.1
GRK5	203725	LVESVi	rs72840788	10	119656173	1.7e-28	0	27.196	68	32.3
PRDX3	477361	LVESVi	rs72840788	10	119656173	1.7e-28	0	153.451	2.1	2.7
SPON1	80122	LVESVi	rs11023059	11	14042845	6.5e-10	1	3.956	20.4	2.7
PXN	3887	LVESVi	rs116904997	12	120230731	1.1e-08	1	25.52	10.9	7.5
RNF10	302749	LVESVi	rs116904997	12	120230731	1.1e-08	0	78.814	9.7	19.1
RPLP0	29496	LVESVi	rs116904997	12	120230731	1.1e-08	0	334.077	8.2	3.8
ALPK3	11626	LVESVi	rs149369954	15	84805730	1.4e-11	0	46.292	1.9	29.7
LMF1	4683	LVESVi	rs8063213	16	942961	7.6e-11	1	1.862	5.4	5.8
NXN	491125	LVESVi	rs2302455	17	1470901	4.6e-09	0	5.5	27.4	15.5
YWHAE	70679	LVESVi	rs2302455	17	1470901	4.6e-09	0	162.502	18.7	22.7
PRKCA	4718	LVESVi	rs9892651	17	66307675	2.1e-09	1	1.641	14.8	11.1
FRMD4B	266039	LVEF	rs56099248	3	69808622	5.1e-12	0	1.765	17.5	21.6
MITF	14214	LVEF	rs56099248	3	69808622	5.1e-12	0	9.039	5.5	64.1
BHLHE41	70459	LVEF	rs113819537	12	26195496	1.7e-08	0	4.629	0.6	0.7
ITPR2	232441	LVEF	rs113819537	12	26195496	1.7e-08	0	1.535	33.9	29.4
RASSF8	130468	LVEF	rs113819537	12	26195496	1.7e-08	0	2.702	27.1	13.2
SSPN	77	LVEF	rs113819537	12	26195496	1.7e-08	1	6.501	2.3	4.2
ALPK2	247486	LVEF	rs10871753	18	58289633	6.1e-10	0	23.686	1.6	46.1
ATP8B1	486318	LVEF	rs10871753	18	58289633	6.1e-10	0	2.101	21.4	11.9
MALT1	381832	LVEF	rs10871753	18	58289633	6.1e-10	0	2.969	4.3	11.2
NEDD4L	1569	LVEF	rs10871753	18	58289633	6.1e-10	0	4.133	3.3	32.9
