# Supplementary material for: HSBP7 Rescue of a Titin Cardiomyopathy Identified by Morphological Profiling
Source: Research Square preprint supplement (doi:10.21203/rs.3.rs-4558927/v1), 2024-07-08
Supplement: Supplementary file 4 [file ede6fb8d342bbab9332bb6ed.xlsx]

## Sheet: Sheet1
Platemap Name	Well	Clone ID	Target Sequence	Barcode Sequence	Vector	Search Taxon	On-target Gene IDs	On-target Gene Symbols	Orig. Target Taxon	Orig. Target Gene ID	Orig. Target Gene Symbol	Notes	Virus Particles per mL
DXH88	A01												913000
DXH88	A02	BRDN0001145912	GGAAGTGCTAACCCCAATGG	GGAAGTGCTAACCCCAATGG	pXPR_BRD003	9606	57538	ALPK3	9606	57538	ALPK3		7224905-maxOut
DXH88	A03	BRDN0000582691	TTCACGAGCGTCCTGTATGC	TTCACGAGCGTCCTGTATGC	pXPR_BRD003	9606	4286	MITF	9606	4286	MITF		7224905-maxOut
DXH88	A04	BRDN0003097827	ACTCACGGATCATTTGACTT	ACTCACGGATCATTTGACTT	pXPR_BRD003	9606	4286	MITF	9606	4286	MITF		7224905-maxOut
DXH88	A05	BRDN0003578940	CGAGGCAGCGCACATTCACA	CGAGGCAGCGCACATTCACA	pXPR_BRD050	9606	9921	RNF10	9606	9921	RNF10		7224905-maxOut
DXH88	A06	BRDN0003482319	TGAAAGCAATGATCTCCGTG	TGAAAGCAATGATCTCCGTG	pXPR_BRD050	9606	5052	PRDX1	9606	5052	PRDX1		7224905-maxOut
DXH88	A07	BRDN0002662143	TGATGCTGGGGAAAAAACTG	TGATGCTGGGGAAAAAACTG	pXPR_BRD050	9606	64778	FNDC3B	9606	64778	FNDC3B		7224905-maxOut
DXH88	A08	BRDN0003481472	CTGCAAAAATGACTAAGCCG	CTGCAAAAATGACTAAGCCG	pXPR_BRD050	9606	5205	ATP8B1	9606	5205	ATP8B1		7224905-maxOut
DXH88	A09	BRDN0003485993	AGGGACGTGCTCATTACGGT	AGGGACGTGCTCATTACGGT	pXPR_BRD050	9606	5829	PXN	9606	5829	PXN		7224905-maxOut
DXH88	A10	BRDN0001146449	AGCTGGCTAACGATGTAGCG	AGCTGGCTAACGATGTAGCG	pXPR_BRD003	9606	23139	MAST2	9606	23139	MAST2		7224905-maxOut
DXH88	A11	BRDN0003229977	AATTACACTTACAAATCCAA	AATTACACTTACAAATCCAA	pXPR_BRD050	9606	10935	PRDX3	9606	10935	PRDX3		7224905-maxOut
DXH88	A12	BRDN0001146703	ATGTGGGAGATACTGATGCA	ATGTGGGAGATACTGATGCA	pXPR_BRD003	9606	5747	PTK2	9606	5747	PTK2		7224905-maxOut
DXH88	B01	BRDN0003786162	CCAATTATCGCACACAACCG	CCAATTATCGCACACAACCG	pXPR_BRD050	9606	83696	TRAPPC9	9606	83696	TRAPPC9		7224905-maxOut
DXH88	B02	BRDN0001488494	AAGAACAAAACCTACCTGGG	AAGAACAAAACCTACCTGGG	pXPR_BRD003	9606	10892	MALT1	9606	10892	MALT1		7224905-maxOut
DXH88	B03	BRDN0003491613	ATTGGCGCAAGGTCGTACGA	ATTGGCGCAAGGTCGTACGA	pXPR_BRD050	9606	3709	ITPR2	9606	3709	ITPR2		7224905-maxOut
DXH88	B04	BRDN0000990543	CGATCATACTGGGAGATGCG	CGATCATACTGGGAGATGCG	pXPR_BRD003	9606	5747	PTK2	9606	5747	PTK2		7224905-maxOut
DXH88	B05	BRDN0003483162	CGCTTCGGGTCTGATACCAA	CGCTTCGGGTCTGATACCAA	pXPR_BRD050	9606	5052	PRDX1	9606	5052	PRDX1		7224905-maxOut
DXH88	B06	BRDN0003676531	GAGCAGGCTGAGCGATACGA	GAGCAGGCTGAGCGATACGA	pXPR_BRD050	9606	7531	YWHAE	9606	7531	YWHAE		7224905-maxOut
DXH88	B07	BRDN0003485910	TGTGCGTCATGTATACCCAA	TGTGCGTCATGTATACCCAA	pXPR_BRD050	9606	57699	CPNE5	9606	57699	CPNE5		7224905-maxOut
DXH88	B08	BRDN0001145588	AGGAAGGAAACATGGAACTC	AGGAAGGAAACATGGAACTC	pXPR_BRD003	9606	5578	PRKCA	9606	5578	PRKCA		7224905-maxOut
DXH88	B09	BRDN0002662635	CAGGTCAATGTCGACCACCG	CAGGTCAATGTCGACCACCG	pXPR_BRD050	9606	64778	FNDC3B	9606	64778	FNDC3B		7224905-maxOut
DXH88	B10	BRDN0003099907	TTGTCATCGAGAGAATCGCA	TTGTCATCGAGAGAATCGCA	pXPR_BRD050	9606	10418	SPON1	9606	10418	SPON1		7224905-maxOut
DXH88	B11	BRDN0003487512	CCAAACACTCACCCAATGTG	CCAAACACTCACCCAATGTG	pXPR_BRD050	9606	64359	NXN	9606	64359	NXN		7224905-maxOut
DXH88	B12	BRDN0001484878	GCAATCGTATCTCTCATAGG	GCAATCGTATCTCTCATAGG	pXPR_BRD003	9606	4715	NDUFB9	9606	4715	NDUFB9		7224905-maxOut
DXH88	C01	BRDN0001146758	GGAGCTCTAGGACCCGCTGT	GGAGCTCTAGGACCCGCTGT	pXPR_BRD003	9606	57538	ALPK3	9606	57538	ALPK3		7224905-maxOut
DXH88	C02	BRDN0003579578	GCTCACAGGCAAAATGCCAA	GCTCACAGGCAAAATGCCAA	pXPR_BRD050	9606	23150	FRMD4B	9606	23150	FRMD4B		7224905-maxOut
DXH88	C03	BRDN0003419729	CACCTCCAACAACCACATCG	CACCTCCAACAACCACATCG	pXPR_BRD050	9606	27129	HSPB7	9606	27129	HSPB7		7224905-maxOut
DXH88	C04	BRDN0001148106	AGAGGTTCAATAAAGTACGG	AGAGGTTCAATAAAGTACGG	pXPR_BRD003	9606	7273	TTN	9606	7273	TTN		7224905-maxOut
DXH88	C05	BRDN0004308356	ACTGCATTGTGACAACCCAT	ACTGCATTGTGACAACCCAT	pXPR_BRD050	9606	54455	FBXO42	9606	54455	FBXO42		7224905-maxOut
DXH88	C06	BRDN0003579171	TGCATAAGAAGGATCTCAAG	TGCATAAGAAGGATCTCAAG	pXPR_BRD050	9606	9921	RNF10	9606	9921	RNF10		7224905-maxOut
DXH88	C07	BRDN0002985972	ATATTTCGGCAGTTGCAGCA	ATATTTCGGCAGTTGCAGCA	pXPR_BRD050	9606			9606 (neg ctrl)			NO_SITE (4 zeros)	7224905-maxOut
DXH88	C08	BRDN0003676011	AGCCTTGACAGCGTCCACAG	AGCCTTGACAGCGTCCACAG	pXPR_BRD050	9606	64788	LMF1	9606	64788	LMF1		7224905-maxOut
DXH88	C09	BRDN0004310485	CAACTATCTTAATCCTCGGA	CAACTATCTTAATCCTCGGA	pXPR_BRD050	9606	54455	FBXO42	9606	54455	FBXO42		7224905-maxOut
DXH88	C10	BRDN0001149352	AGGTGGGGCTTCCGTAAGTG	AGGTGGGGCTTCCGTAAGTG	pXPR_BRD003	9606	5578	PRKCA	9606	5578	PRKCA		7224905-maxOut
DXH88	C11	BRDN0001480673	TGAGACCAAAAAGCTATACA	TGAGACCAAAAAGCTATACA	pXPR_BRD003	9606	10892	MALT1	9606	10892	MALT1		7224905-maxOut
DXH88	C12	BRDN0003419123	CTGCATCATCATCTCGTAGG	CTGCATCATCATCTCGTAGG	pXPR_BRD050	9606	23787	MTCH1	9606	23787	MTCH1		7224905-maxOut
DXH88	D01	BRDN0003491193	GGACAACGCCCCGACCACTG	GGACAACGCCCCGACCACTG	pXPR_BRD050	9606	23787	MTCH1	9606	23787	MTCH1		7224905-maxOut
DXH88	D02	BRDN0003417926	GCAGGCAACATCAAGACCCT	GCAGGCAACATCAAGACCCT	pXPR_BRD050	9606	27129	HSPB7	9606	27129	HSPB7		7224905-maxOut
DXH88	D03	BRDN0003676184	ATGAAGCTGGATTCCCGCGG	ATGAAGCTGGATTCCCGCGG	pXPR_BRD050	9606	79365	BHLHE41	9606	79365	BHLHE41		7224905-maxOut
DXH88	D04	BRDN0003488935	GATCAACCACTTGCACGCCG	GATCAACCACTTGCACGCCG	pXPR_BRD050	9606	79365	BHLHE41	9606	79365	BHLHE41		7224905-maxOut
DXH88	D05	BRDN0003483498	GAGAAGCCTAAGCGGAATGG	GAGAAGCCTAAGCGGAATGG	pXPR_BRD050	9606	5829	PXN	9606	5829	PXN		7224905-maxOut
DXH88	D06	BRDN0001497612	GGAATGGAGATGTACCCCCG	GGAATGGAGATGTACCCCCG	pXPR_BRD050	9606	9531	BAG3	9606	9531	BAG3		7224905-maxOut
DXH88	D07	BRDN0005315820	TTCCAAGCCTGTATCAACTC	TTCCAAGCCTGTATCAACTC	pXPR_BRD050	9606	286053	NSMCE2	9606	286053	NSMCE2		7224905-maxOut
DXH88	D08	BRDN0001148840	TATGCGGCAGAGATCCTCTG	TATGCGGCAGAGATCCTCTG	pXPR_BRD003	9606	2869	GRK5	9606	2869	GRK5		7224905-maxOut
DXH88	D09	BRDN0001145734	TCTGATGATAAATGACTGCG	TCTGATGATAAATGACTGCG	pXPR_BRD003	9606	5747	PTK2	9606	5747	PTK2		7224905-maxOut
DXH88	D10	BRDN0001487932	TCTGGACGCACCACGACTCG	TCTGGACGCACCACGACTCG	pXPR_BRD003	9606	4715	NDUFB9	9606	4715	NDUFB9		7224905-maxOut
DXH88	D11	BRDN0002662890	GGTACCAATGTCGTTTCGAG	GGTACCAATGTCGTTTCGAG	pXPR_BRD050	9606	64778	FNDC3B	9606	64778	FNDC3B		7224905-maxOut
DXH88	D12	BRDN0001146913	GAAAGGCCTAGTCGGCTGGG	GAAAGGCCTAGTCGGCTGGG	pXPR_BRD003	9606	57538	ALPK3	9606	57538	ALPK3		7224905-maxOut
DXH88	E01	BRDN0001065841	ACAGCTATAGACATGCTCGG	ACAGCTATAGACATGCTCGG	pXPR_BRD003	9606	5337	PLD1	9606	5337	PLD1		7224905-maxOut
DXH88	E02	BRDN0002985967	TCTCGTAGCCTAATGCGCCA	TCTCGTAGCCTAATGCGCCA	pXPR_BRD050	9606			9606 (neg ctrl)			NO_SITE (5 zeros)	7224905-maxOut
DXH88	E03	BRDN0004309017	TGAAGTGCTTGATATCACAG	TGAAGTGCTTGATATCACAG	pXPR_BRD050	9606	6175	RPLP0	9606	6175	RPLP0		7224905-maxOut
DXH88	E04	BRDN0003514225	GTTGGGGTAGAAAGCCACGT	GTTGGGGTAGAAAGCCACGT	pXPR_BRD050	9606	83696	TRAPPC9	9606	83696	TRAPPC9		7224905-maxOut
DXH88	E05	BRDN0003786580	GGCTGCGGAGAACAGCCTAG	GGCTGCGGAGAACAGCCTAG	pXPR_BRD050	9606	7531	YWHAE	9606	7531	YWHAE		7224905-maxOut
DXH88	E06	BRDN0001499772	CTGGACAGATGACCTGAACG	CTGGACAGATGACCTGAACG	pXPR_BRD050	9606	9531	BAG3	9606	9531	BAG3		7224905-maxOut
DXH88	E07	BRDN0001149298	GTGACAAGCAGCCAATCGGG	GTGACAAGCAGCCAATCGGG	pXPR_BRD003	9606	2869	GRK5	9606	2869	GRK5		7224905-maxOut
DXH88	E08	BRDN0001147970	CAGTATGTCACGCTCCACGA	CAGTATGTCACGCTCCACGA	pXPR_BRD003	9606	23139	MAST2	9606	23139	MAST2		7224905-maxOut
DXH88	E09	BRDN0001482907	ATTCTTATGTTCTTCAAACC	ATTCTTATGTTCTTCAAACC	pXPR_BRD003	9606	4715	NDUFB9	9606	4715	NDUFB9		7224905-maxOut
DXH88	E10	BRDN0001146333	ATCATTAGCTCAACACTCGG	ATCATTAGCTCAACACTCGG	pXPR_BRD003	9606	115701	ALPK2	9606	115701	ALPK2		7224905-maxOut
DXH88	E11	BRDN0001149127	GGCCTGAGCCCCGACTACTG	GGCCTGAGCCCCGACTACTG	pXPR_BRD003	9606	2869	GRK5	9606	2869	GRK5		7224905-maxOut
DXH88	E12	BRDN0002986023	TAAGCGTAAGCATAGCCATG	TAAGCGTAAGCATAGCCATG	pXPR_BRD050	9606	4286	MITF	9606	4286	MITF		7224905-maxOut
DXH88	F01	BRDN0003692904	AGGAGCCGTAGCGATCCTTG	AGGAGCCGTAGCGATCCTTG	pXPR_BRD050	9606	4625	MYH7	9606	4625	MYH7		7224905-maxOut
DXH88	F02	BRDN0001147473	GAGAGCAAGGCATCAGACGG	GAGAGCAAGGCATCAGACGG	pXPR_BRD003	9606	115701	ALPK2	9606	115701	ALPK2		7224905-maxOut
DXH88	F03	BRDN0001481186	ACCTCGGACCACACACCCGA	ACCTCGGACCACACACCCGA	pXPR_BRD003	9606	1187	CLCNKA	9606	1187	CLCNKA		7224905-maxOut
DXH88	F04	BRDN0001146731	GCACATCACCTACACTACCA	GCACATCACCTACACTACCA	pXPR_BRD003	9606	23139	MAST2	9606	23139	MAST2		7224905-maxOut
DXH88	F05	BRDN0003692918	AAGCCGGGAACCAGCTACCG	AAGCCGGGAACCAGCTACCG	pXPR_BRD050	9606	10418	SPON1	9606	10418	SPON1		7224905-maxOut
DXH88	F06	BRDN0003418618	TTGAAGTTCATGATCCACGA	TTGAAGTTCATGATCCACGA	pXPR_BRD050	9606	23150	FRMD4B	9606	23150	FRMD4B		7224905-maxOut
DXH88	F07	BRDN0003229632	CAGATCCGGACTATGGAAAG	CAGATCCGGACTATGGAAAG	pXPR_BRD050	9606	11228	RASSF8	9606	11228	RASSF8		7224905-maxOut
DXH88	F08	BRDN0003786175	TGGAGTGTCCCTGACTAGCA	TGGAGTGTCCCTGACTAGCA	pXPR_BRD050	9606	8082	SSPN	9606	8082	SSPN		7224905-maxOut
DXH88	F09	BRDN0003291896	CAATGGCAATAGACTCGAAG	CAATGGCAATAGACTCGAAG	pXPR_BRD050	9606	157378	TMEM65	9606	157378	TMEM65		7224905-maxOut
DXH88	F10	BRDN0003229315	TGCCCCCCTTAGCTAAACTG	TGCCCCCCTTAGCTAAACTG	pXPR_BRD050	9606	11228	RASSF8	9606	11228	RASSF8		7224905-maxOut
DXH88	F11	BRDN0003488232	CAGGGCCTGATCAAGATCCG	CAGGGCCTGATCAAGATCCG	pXPR_BRD050	9606	64788	LMF1	9606	64788	LMF1		7224905-maxOut
DXH88	F12	BRDN0004309372	TCTGGGGACATCGTACCTCG	TCTGGGGACATCGTACCTCG	pXPR_BRD050	9606	23327	NEDD4L	9606	23327	NEDD4L		7224905-maxOut
DXH88	G01	BRDN0003292287	CTATGAAAGGTATCGCATTG	CTATGAAAGGTATCGCATTG	pXPR_BRD050	9606	157378	TMEM65	9606	157378	TMEM65		7224905-maxOut
DXH88	G02	BRDN0003482986	AGTTCCTCAAATCTCTACCC	AGTTCCTCAAATCTCTACCC	pXPR_BRD050	9606	5205	ATP8B1	9606	5205	ATP8B1		7224905-maxOut
DXH88	G03	BRDN0005318647	AGACTGCTGCCTCATATCCG	AGACTGCTGCCTCATATCCG	pXPR_BRD050	9606	6175	RPLP0	9606	6175	RPLP0		7224905-maxOut
DXH88	G04	BRDN0003489117	GAGCTGCGAATAGTGGTGGG	GAGCTGCGAATAGTGGTGGG	pXPR_BRD050	9606	8082	SSPN	9606	8082	SSPN		7224905-maxOut
DXH88	G05	BRDN0004437980	AGCAGACTCTACACCACTGA	AGCAGACTCTACACCACTGA	pXPR_BRD050	9606	286053	NSMCE2	9606	286053	NSMCE2		2430000
DXH88	G06	BRDN0001145502	GTACCTAACGACGAAAGGTG	GTACCTAACGACGAAAGGTG	pXPR_BRD003	9606	7273	TTN	9606	7273	TTN		7224905-maxOut
DXH88	G07	BRDN0003492553	GGCATAGCGAACAGGCACCA	GGCATAGCGAACAGGCACCA	pXPR_BRD050	9606	3709	ITPR2	9606	3709	ITPR2		7224905-maxOut
DXH88	G08	BRDN0003463641	GACAGCAGGTGCATGGCATG	GACAGCAGGTGCATGGCATG	pXPR_BRD050	9606	10935	PRDX3	9606	10935	PRDX3		7224905-maxOut
DXH88	G09	BRDN0001485360	GGACGCCGCAGATGCCACTG	GGACGCCGCAGATGCCACTG	pXPR_BRD003	9606	1187	CLCNKA	9606	1187	CLCNKA		7224905-maxOut
DXH88	G10	BRDN0001146981	TGAGTGCTTTCAAGCGACCA	TGAGTGCTTTCAAGCGACCA	pXPR_BRD003	9606	115701	ALPK2	9606	115701	ALPK2		7224905-maxOut
DXH88	G11	BRDN0004618871	AGAACAGGGCCATCTACCAC	AGAACAGGGCCATCTACCAC	pXPR_BRD050	9606	23327	NEDD4L	9606	23327	NEDD4L		7224905-maxOut
DXH88	G12	BRDN0001483404	TGTTCTTATTGGATATGTGT	TGTTCTTATTGGATATGTGT	pXPR_BRD003	9606	10892	MALT1	9606	10892	MALT1		7224905-maxOut
DXH88	H01	BRDN0003439557	CTCACCGGACTACGAGACCG	CTCACCGGACTACGAGACCG	pXPR_BRD050	9606	282996	RBM20	9606	282996	RBM20		7224905-maxOut
DXH88	H02	BRDN0001065840	GTGAGCCCACAAATAGACGG	GTGAGCCCACAAATAGACGG	pXPR_BRD003	9606	5337	PLD1	9606	5337	PLD1		7224905-maxOut
DXH88	H03	BRDN0004618536	TTATCCGAAATGTTTCATTG	TTATCCGAAATGTTTCATTG	pXPR_BRD050	9606	6175	RPLP0	9606	6175	RPLP0		7224905-maxOut
DXH88	H04	BRDN0003439414	GTTTGCGATCATGTGCCCAG	GTTTGCGATCATGTGCCCAG	pXPR_BRD050	9606	282996	RBM20	9606	282996	RBM20		7224905-maxOut
DXH88	H05	BRDN0001065838	CAGTGGTTGAGGGAAATCGT	CAGTGGTTGAGGGAAATCGT	pXPR_BRD003	9606	5337	PLD1	9606	5337	PLD1		7224905-maxOut
DXH88	H06	BRDN0003479599	GGGCAATGAGTACGTCACCA	GGGCAATGAGTACGTCACCA	pXPR_BRD050	9606	4625	MYH7	9606	4625	MYH7		7224905-maxOut
DXH88	H07	BRDN0001481750	CTGACCATACCACTTTGCCC	CTGACCATACCACTTTGCCC	pXPR_BRD003	9606	1187	CLCNKA	9606	1187	CLCNKA		7224905-maxOut
DXH88	H08	BRDN0001148197	CCTTGACCGAGTGAAACTCA	CCTTGACCGAGTGAAACTCA	pXPR_BRD003	9606	5578	PRKCA	9606	5578	PRKCA		7224905-maxOut
DXH88	H09	BRDN0001502955	ACAACAGCCGCACCACTACG	ACAACAGCCGCACCACTACG	pXPR_BRD050	9606	9531	BAG3	9606	9531	BAG3		7224905-maxOut
DXH88	H10	BRDN0001146399	AGAACCTGCAACAATCACCG	AGAACCTGCAACAATCACCG	pXPR_BRD003	9606	7273	TTN	9606	7273	TTN		7224905-maxOut
DXH88	H11	BRDN0003486577	GGCTGTACGGAATCCAAGGT	GGCTGTACGGAATCCAAGGT	pXPR_BRD050	9606	64359	NXN	9606	64359	NXN		7224905-maxOut
DXH88	H12	BRDN0003484466	GGTATTCTACAGAAGCAACG	GGTATTCTACAGAAGCAACG	pXPR_BRD050	9606	57699	CPNE5	9606	57699	CPNE5		1580000
