# Supplementary figures and images for: HSBP7 Rescue of a Titin Cardiomyopathy Identified by Morphological Profiling
Source: Research Square preprint supplement (doi:10.21203/rs.3.rs-4558927/v1), 2024-07-08

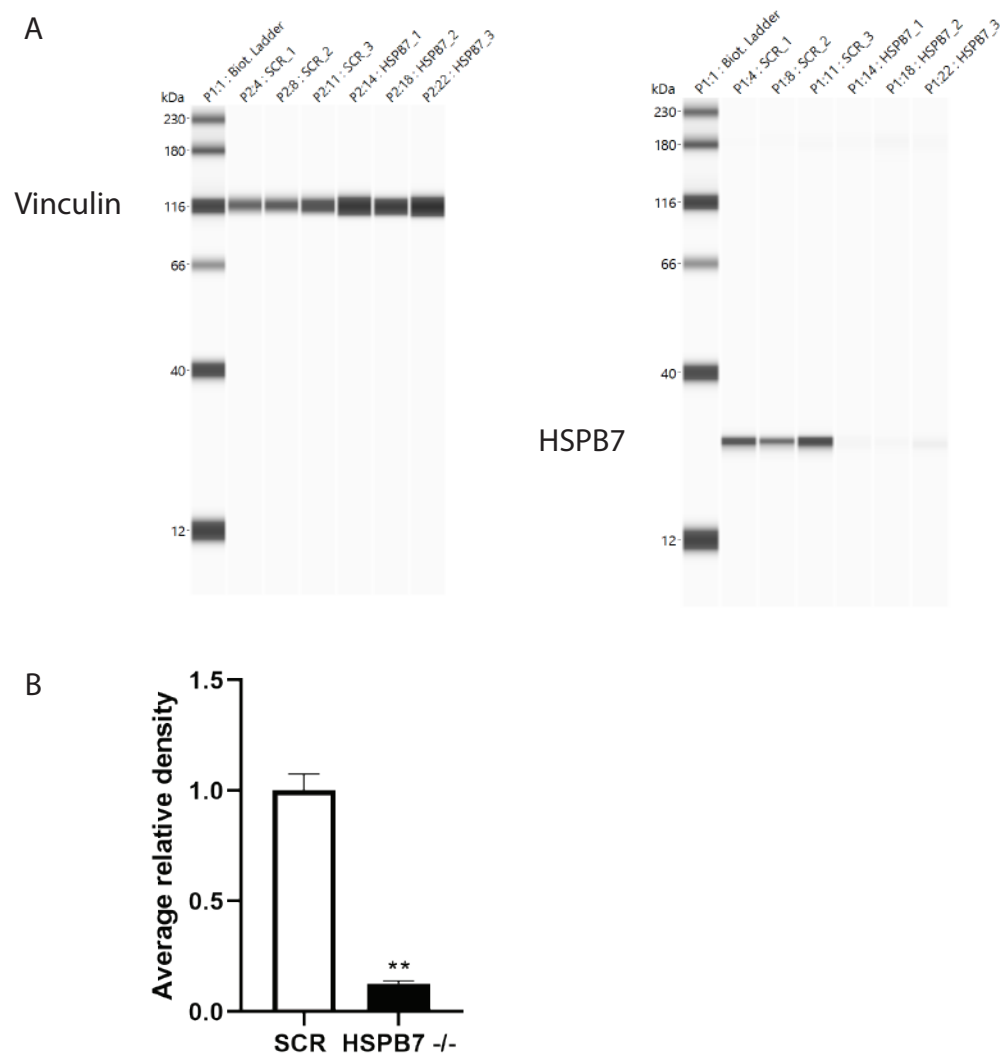

Figure S6

Supplement: Supplementary file 1 [file 3c44a4e4365670af0aa93445.pdf]

A

I Sarcomere feature changes compared to control

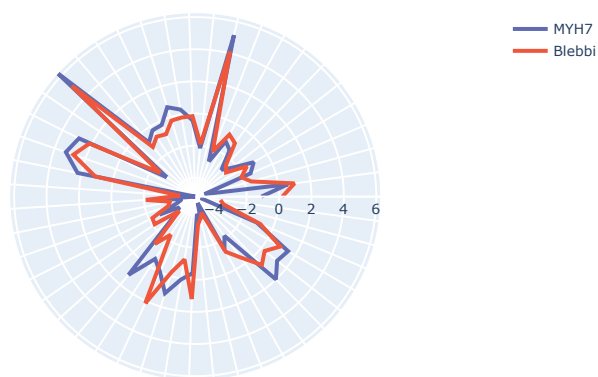

B

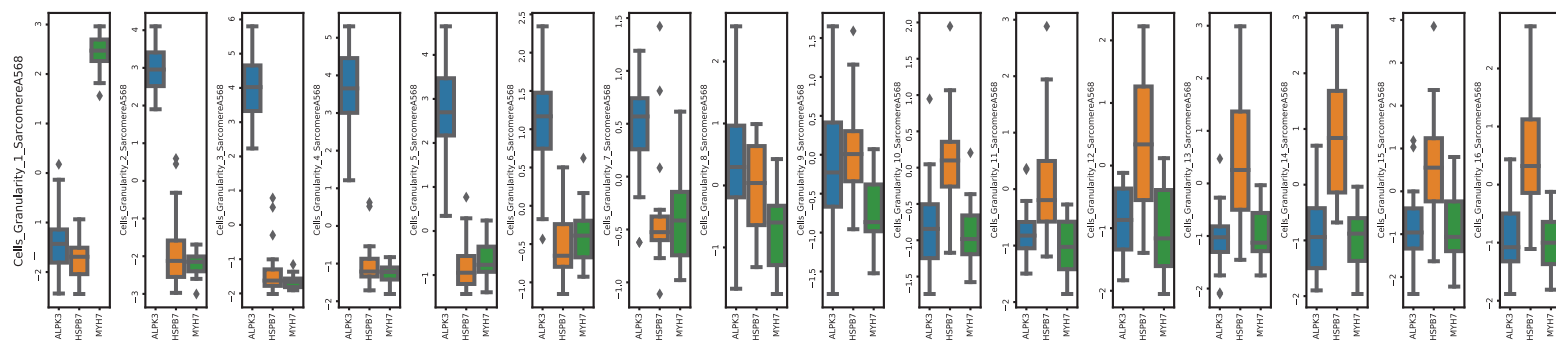

C

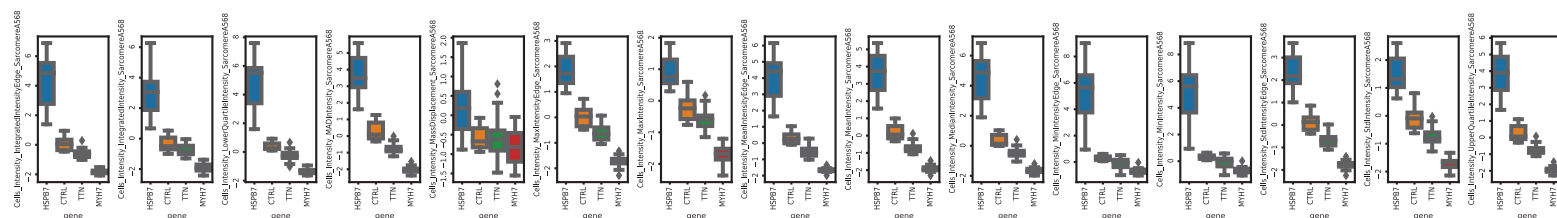

Figure S4

Supplement: Supplementary file 2 [file 6f3c6cab32560660e883be6f.pdf]
